# Supplementary material for: A gridded dataset of consumptive water footprints, evaporation, transpiration, and associated benchmarks related to crop production in China during 2000–2018
Source: Copernicus journal article supplement (doi:10.5194/essd-15-4803-2023), 2023-10-31
Supplement: Supplementary file 1 [file essd-15-4803-2023-supplement.pdf]

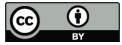

*Supplement of*

**A gridded dataset of consumptive water footprints, evaporation, transpiration, and associated benchmarks related to crop production in China during 2000–2018**

Wei Wang et al.

*Correspondence to:* La Zhuo ([zhuola@nwafu.edu.cn](mailto:zhuola@nwafu.edu.cn), [lzhuo@ms.iswc.ac.cn](mailto:lzhuo@ms.iswc.ac.cn)) and Pute Wu ([gjzwpt@vip.sina.com](mailto:gjzwpt@vip.sina.com))

The copyright of individual parts of the supplement might differ from the article licence.

# Contents

|                                                                                                                                                                              |          |
|------------------------------------------------------------------------------------------------------------------------------------------------------------------------------|----------|
| <b>Supplementary Table</b> .....                                                                                                                                             | <b>1</b> |
| Table S1. Benchmarks for the uWFCP at different production percentiles of 21 crops under various water supply and irrigation practices ( $\text{m}^3 \text{ton}^{-1}$ )..... | 1        |
| <b>Supplementary Figures</b> .....                                                                                                                                           | <b>4</b> |
| Fig. S1 The WFCP (a), WFCPg (b), WFCPb (c) of 21 crops, and total WFCP under different water supply and irrigation practices (d).....                                        | 4        |
| Fig. S2 Total national monthly WFCPg and WFCPb in soil evaporation (cross filling represents WFCPg, dot filling indicates WFCPb). .....                                      | 5        |
| Fig. S3 Total national monthly WFCPg and WFCPb in crop transpiration (cross filling represents WFCPg, dot filling indicates WFCPb). .....                                    | 6        |
| Fig. S4 Gridded WFCPb and WFCPg in 2017.....                                                                                                                                 | 7        |
| Fig. S5 Gridded WFCPg and WFCPg in 2017.....                                                                                                                                 | 8        |
| Fig. S6 Gridded monthly total WFCP (a), WFCPb (b) and WFCPg (c) of 21crops in furrow irrigation in 2017.....                                                                 | 9        |
| Fig. S7 Gridded monthly total WFCP (a), WFCPb (b) and WFCPg (c) of 21crops in micro irrigation in 2017. ....                                                                 | 10       |
| Fig. S8 Gridded monthly total WFCP (a), WFCPb (b) and WFCPg (c) of 21crops in sprinkler irrigation in 2017.....                                                              | 11       |
| Fig. S9 Gridded monthly total WFCP in rain-fed conditions in 2017.....                                                                                                       | 12       |
| Fig. S10 Gridded monthly total WFCP, WFCPb and WFCPg in furrow irrigation (a), micro irrigation (b), sprinkler irrigation (c) and rain-fed conditions (d) in 2017.....       | 12       |
| Fig. S11 Gridded WFCPb in soil evaporation in 2017.....                                                                                                                      | 13       |
| Fig. S12 Gridded WFCPg in soil evaporation in 2017.....                                                                                                                      | 14       |
| Fig. S13 Gridded WFCPb in soil crop transpiration in 2017. ....                                                                                                              | 15       |
| Fig. S14 Gridded WFCPg in soil crop transpiration in 2017. ....                                                                                                              | 16       |
| Fig. S15 Interannual variation in uWFCPb, uWFCPg and yield under different water supply and irrigation practices over 2000-2018. ....                                        | 18       |
| Fig. S16 Proportion of blue and green water consumption for soil evaporation and crop transpiration under different water supply and irrigation practices. ....              | 19       |
| Fig. S17 Gridded uWFCPb (Annual average for 2010-2018).....                                                                                                                  | 20       |
| Fig. S18 Gridded uWFCPg (Annual average for 2010-2018).....                                                                                                                  | 21       |
| Fig. S19 Relative changes of the average gridded uWFCP for 2000-2009 to that for 2010-2018.....                                                                              | 22       |
| Fig. S20 Relative changes of the average gridded uWFCPb for 2000-2009 to that for 2010-2018.....                                                                             | 23       |
| Fig. S21 Relative changes of the average gridded uWFCPg for 2000-2009 to that for 2010-2018.....                                                                             | 24       |



|                                                                                                                                                         |           |
|---------------------------------------------------------------------------------------------------------------------------------------------------------|-----------|
| Fig. S22 Gridded uWFCPb (Annual average for 2010-2018).....                                                                                             | 28        |
| Fig. S23 Gridded uWFCPg (Annual average for 2010-2018).....                                                                                             | 32        |
| Fig. S24 Relative changes of the average gridded uWFCPb under different water supply and irrigation practices for 2000-2009 to that for 2010-2018. .... | 36        |
| Fig. S25 Relative changes of the average gridded uWFCPg under different water supply and irrigation practices for 2000-2009 to that for 2010-2018. .... | 40        |
| Fig. S26 Benchmarks for the uWFCP at different production percentiles under micro irrigation in China by 2018.....                                      | 41        |
| Fig. S27 Benchmarks for the uWFCP at different production percentiles under sprinkler irrigation in China by 2018.....                                  | 42        |
| Fig. S28 Benchmarks for the uWFCP at different production percentiles under rain-fed conditions in China by 2018.....                                   | 43        |
| <b>Supplementary data and methods .....</b>                                                                                                             | <b>44</b> |
| Planting area selection .....                                                                                                                           | 44        |
| Validation results.....                                                                                                                                 | 49        |
| Phenology selection .....                                                                                                                               | 52        |
| <b>References.....</b>                                                                                                                                  | <b>54</b> |

## Supplementary Table

**Table S1. Benchmarks for the uWFCP at different production percentiles of 21 crops under various water supply and irrigation practices ( $\text{m}^3 \text{ton}^{-1}$ )**

| Crop           | Climate zones | Furrow irrigation |             |             | Micro irrigation |             |             |
|----------------|---------------|-------------------|-------------|-------------|------------------|-------------|-------------|
|                |               | 10th              | 20th        | 25th        | 10th             | 20th        | 25th        |
| Wheat          | Humid         | 859±92            | 889±96      | 901±98      | 846±94           | 903±87      | 918±87      |
|                | Arid          | 854±56            | 959±62      | 1,002±67    | 731±61           | 770±76      | 789±80      |
| Maize          | Humid         | 747±68            | 804±56      | 826±53      | 664±111          | 716±94      | 746±83      |
|                | Arid          | 657±155           | 714±142     | 731±143     | 560±138          | 576±144     | 582±145     |
| Early rice     | Humid         | 544±36            | 566±35      | 578±34      | –                | –           | –           |
|                | Arid          | –                 | –           | –           | –                | –           | –           |
| Mid rice       | Humid         | 629±25            | 660±30      | 673±33      | –                | –           | –           |
|                | Arid          | 755±50            | 798±63      | 814±66      | –                | –           | –           |
| Late rice      | Humid         | 672±34            | 701±34      | 712±35      | –                | –           | –           |
|                | Arid          | –                 | –           | –           | –                | –           | –           |
| Sorghum        | Humid         | 1,061±149         | 1,147±176   | 1,181±190   | 1,076±200        | 1,144±230   | 1,178±250   |
|                | Arid          | 1,022±187         | 1,121±177   | 1,183±166   | 743±201          | 802±236     | 826±252     |
| Millet         | Humid         | 1,166±337         | 1,303±351   | 1,398±316   | 1,342±223        | 1,436±227   | 1,463±225   |
|                | Arid          | 1,446±516         | 1,712±502   | 1,767±478   | 1,521±523        | 1,635±570   | 1,674±580   |
| Barley         | Humid         | 622±94            | 661±96      | 687±87      | 480±55           | 524±61      | 550±67      |
|                | Arid          | 504±34            | 579±82      | 601±93      | 544±102          | 579±106     | 591±106     |
| Soybean        | Humid         | 1855±98           | 2032±74     | 2,098±84    | 1,890±197        | 2,000±200   | 2,068±170   |
|                | Arid          | 2,214±162         | 2,362±174   | 2,420±181   | 2,101±277        | 2,186±287   | 2,218±290   |
| Potatoes       | Humid         | 153±42            | 218±75      | 248±79      | 133±56           | 169±62      | 184±68      |
|                | Arid          | 126±17            | 142±24      | 145±24      | 143±41           | 267±275     | 339±335     |
| Sweet potatoes | Humid         | 858±127           | 944±90      | 981±93      | 831±150          | 921±124     | 949±124     |
|                | Arid          | 1,061±161         | 1,211±178   | 1,235±185   | 749±203          | 787±217     | 833±245     |
| Cotton         | Humid         | 4,663±412         | 5,307±494   | 5,704±506   | 2,266±1,579      | 3,225±2,113 | 4,108±1,584 |
|                | Arid          | 1,704±306         | 1,713±309   | 1,728±308   | 1,582±283        | 1,588±287   | 1,592±287   |
| Sugar cane     | Humid         | 26±2              | 27±2        | 29±3        | 29±4             | 33±11       | 37±16       |
|                | Arid          | 360±172           | 364±173     | 364±173     | 345±165          | 349±165     | 349±165     |
| Sugar beets    | Humid         | 9±2               | 9±2         | 9±2         | 8±2              | 8±2         | 8±2         |
|                | Arid          | 11±2              | 11±2        | 11±2        | 10±2             | 10±2        | 10±2        |
| Groundnuts     | Humid         | 705±176           | 752±205     | 793±219     | 732±123          | 816±131     | 849±134     |
|                | Arid          | 1,025±80          | 1,054±83    | 1,061±84    | 957±71           | 1,001±80    | 1,061±136   |
| Rapeseed       | Humid         | 1,079±211         | 1,079±211   | 1,079±211   | 989±241          | 989±241     | 989±241     |
|                | Arid          | –                 | –           | –           | –                | –           | –           |
| Sunflower      | Humid         | 1,438±289         | 1,698±342   | 1,820±348   | 1,134±358        | 1,388±501   | 1,532±595   |
|                | Arid          | 943±202           | 991±224     | 1,017±229   | 968±188          | 999±190     | 1,026±171   |
| Tomatoes       | Humid         | 56±12             | 60±13       | 62±13       | 52±13            | 57±12       | 58±13       |
|                | Arid          | 61±11             | 67±12       | 70±13       | 49±11            | 53±12       | 55±12       |
| Apple          | Humid         | 280±92            | 298±98      | 304±100     | 264±80           | 293±76      | 322±64      |
|                | Arid          | 364±166           | 529±198     | 576±183     | 424±127          | 439±134     | 443±135     |
| Tea            | Humid         | 3,485±1,387       | 3,900±1,520 | 4,225±1,533 | 3,298±1,432      | 3,645±1,597 | 3,852±1,670 |

|         |       |              |              |              |              |              |              |
|---------|-------|--------------|--------------|--------------|--------------|--------------|--------------|
|         | Arid  | 16,588±9,371 | 16,892±9,542 | 17,026±9,662 | 14,006±7,945 | 14,345±8,133 | 14,459±8,213 |
| Tobacco | Humid | 1,256±301    | 1,455±363    | 1,587±319    | 1,202±201    | 1,321±202    | 1,424±275    |
|         | Arid  | 1,218±280    | 1,259±296    | 1,287±307    | 1,041±185    | 1,101±196    | 1,132±209    |
| Cabbage | Humid | 747±68       | 804±56       | 826±53       | 664±111      | 716±94       | 746±83       |
|         | Arid  | 657±155      | 714±142      | 731±143      | 560±138      | 576±144      | 582±145      |
| Grapes  | Humid | –            | –            | –            | –            | –            | –            |
|         | Arid  | 280±58       | 280±58       | 280±58       | 245±58       | 245±58       | 245±58       |

**Continued Table S1.**

| Crop           | Climate zones | Sprinkler irrigation |           |           | Rain-fed  |           |           |
|----------------|---------------|----------------------|-----------|-----------|-----------|-----------|-----------|
|                |               | 10th                 | 20th      | 25th      | 10th      | 20th      | 25th      |
| Wheat          | Humid         | 894±104              | 932±112   | 958±120   | 844±108   | 924±121   | 966±120   |
|                | Arid          | 984±59               | 1,107±97  | 1,120±100 | 832±140   | 1,010±129 | 1,042±126 |
| Maize          | Humid         | 738±93               | 782±92    | 803±91    | 676±68    | 718±61    | 737±58    |
|                | Arid          | 738±151              | 763±161   | 772±165   | 691±139   | 750±141   | 775±140   |
| Early rice     | Humid         | 558±33               | 581±33    | 589±34    | –         | –         | –         |
|                | Arid          | –                    | –         | –         | –         | –         | –         |
| Mid rice       | Humid         | 608±26               | 632±27    | 642±28    | –         | –         | –         |
|                | Arid          | 728±28               | 758±28    | 781±36    | –         | –         | –         |
| Late rice      | Humid         | 660±36               | 698±38    | 710±41    | –         | –         | –         |
|                | Arid          | –                    | –         | –         | –         | –         | –         |
| Sorghum        | Humid         | 1,156±248            | 1,218±281 | 1,275±301 | 616±117   | 653±129   | 690±153   |
|                | Arid          | 1,180±207            | 1,317±257 | 1,408±250 | 704±184   | 772±234   | 802±240   |
| Millet         | Humid         | 1,225±316            | 1,363±380 | 1,418±414 | 1,284±377 | 1,472±307 | 1,515±293 |
|                | Arid          | 1,501±540            | 1,770±593 | 1,847±594 | 1,557±371 | 1,650±394 | 1,705±396 |
| Barley         | Humid         | 632±110              | 703±105   | 736±92    | 490±66    | 576±80    | 615±78    |
|                | Arid          | 563±101              | 625±125   | 649±144   | 444±55    | 498±87    | 568±166   |
| Soybean        | Humid         | 1,834±255            | 2,008±251 | 2,103±220 | 1,868±154 | 2,056±172 | 2,105±188 |
|                | Arid          | 2,239±357            | 2,420±277 | 2,496±243 | 2,431±343 | 2,696±335 | 2,802±329 |
| Potatoes       | Humid         | 175±51               | 220±72    | 238±67    | 400±144   | 763±137   | 905±103   |
|                | Arid          | 141±26               | 145±25    | 147±26    | 786±166   | 994±231   | 1,102±258 |
| Sweet potatoes | Humid         | 845±158              | 957±139   | 986±138   | 952±86    | 1,055±45  | 1,086±39  |
|                | Arid          | 879±137              | 980±134   | 1,008±127 | 1,156±175 | 1,283±234 | 1,331±248 |
| Cotton         | Humid         | 5,356±760            | 6,235±586 | 6,394±619 | 4,457±458 | 4,837±395 | 4,969±369 |
|                | Arid          | 1,758±316            | 1,772±316 | 1,788±320 | 1,309±238 | 1,415±253 | 1,465±257 |
| Sugar cane     | Humid         | 27±3                 | 31±4      | 32±5      | 109±9     | 115±10    | 118±9     |
|                | Arid          | 368±177              | 372±177   | 372±177   | –         | –         | –         |
| Sugar beets    | Humid         | 9±2                  | 9±2       | 13±11     | 31±13     | 45±25     | 51±30     |
|                | Arid          | 11±2                 | 11±2      | 11±2      | 22±4      | 29±3      | 31±3      |
| Groundnuts     | Humid         | 723±182              | 802±180   | 868±156   | 898±140   | 1,048±156 | 1,111±151 |
|                | Arid          | 1070±96              | 1,090±95  | 1097±97   | 2,084±623 | 2,400±669 | 2,514±679 |
| Rapeseed       | Humid         | 1,111±196            | 1,111±196 | 1,111±196 | 77±20     | 101±35    | 122±50    |
|                | Arid          | –                    | –         | –         | 89±21     | 128±35    | 168±43    |
| Sunflower      | Humid         | 1,280±454            | 1,676±355 | 1,746±376 | 732±219   | 818±291   | 888±322   |
|                | Arid          | 993±242              | 1,044±268 | 1,062±273 | 940±167   | 1,059±180 | 1,122±163 |
| Tomatoes       | Humid         | 48±12                | 53±13     | 56±14     | –         | –         | –         |
|                | Arid          | 66±16                | 75±17     | 76±17     | –         | –         | –         |
| Apple          | Humid         | 303±102              | 329±113   | 346±118   | 281±84    | 304±89    | 317±89    |

|         |       |              |               |               |             |             |             |
|---------|-------|--------------|---------------|---------------|-------------|-------------|-------------|
|         | Arid  | 369±149      | 527±150       | 563±127       | 394±153     | 426±160     | 444±164     |
| Tea     | Humid | 3,467±1,326  | 3,861±1,552   | 4,101±1,653   | 4,012±1,023 | 4,477±1,071 | 4,716±1,062 |
|         | Arid  | 17,694±9,990 | 18,040±10,210 | 18,165±10,314 |             |             |             |
| Tobacco | Humid | 1,178±275    | 1,316±298     | 1,355±313     | 1,836±134   | 1,995±94    | 2,044±98    |
|         | Arid  | 1,256±307    | 1,294±337     | 1,326±360     | 1,537±422   | 2,037±531   | 2,267±600   |
| Cabbage | Humid | 738±93       | 782±92        | 803±91        | 676±68      | 718±61      | 737±58      |
|         | Arid  | 738±151      | 763±161       | 772±165       | 691±139     | 750±141     | 775±140     |
| Grapes  | Humid | –            | –             | –             | 229±42      | 251±46      | 260±47      |
|         | Arid  | 294±60       | 294±60        | 294±60        | 232±46      | 243±50      | 248±52      |

Note: Data are mean ± SD for the years 2000–2018. “–” means no crops are grown.

## Supplementary Figures

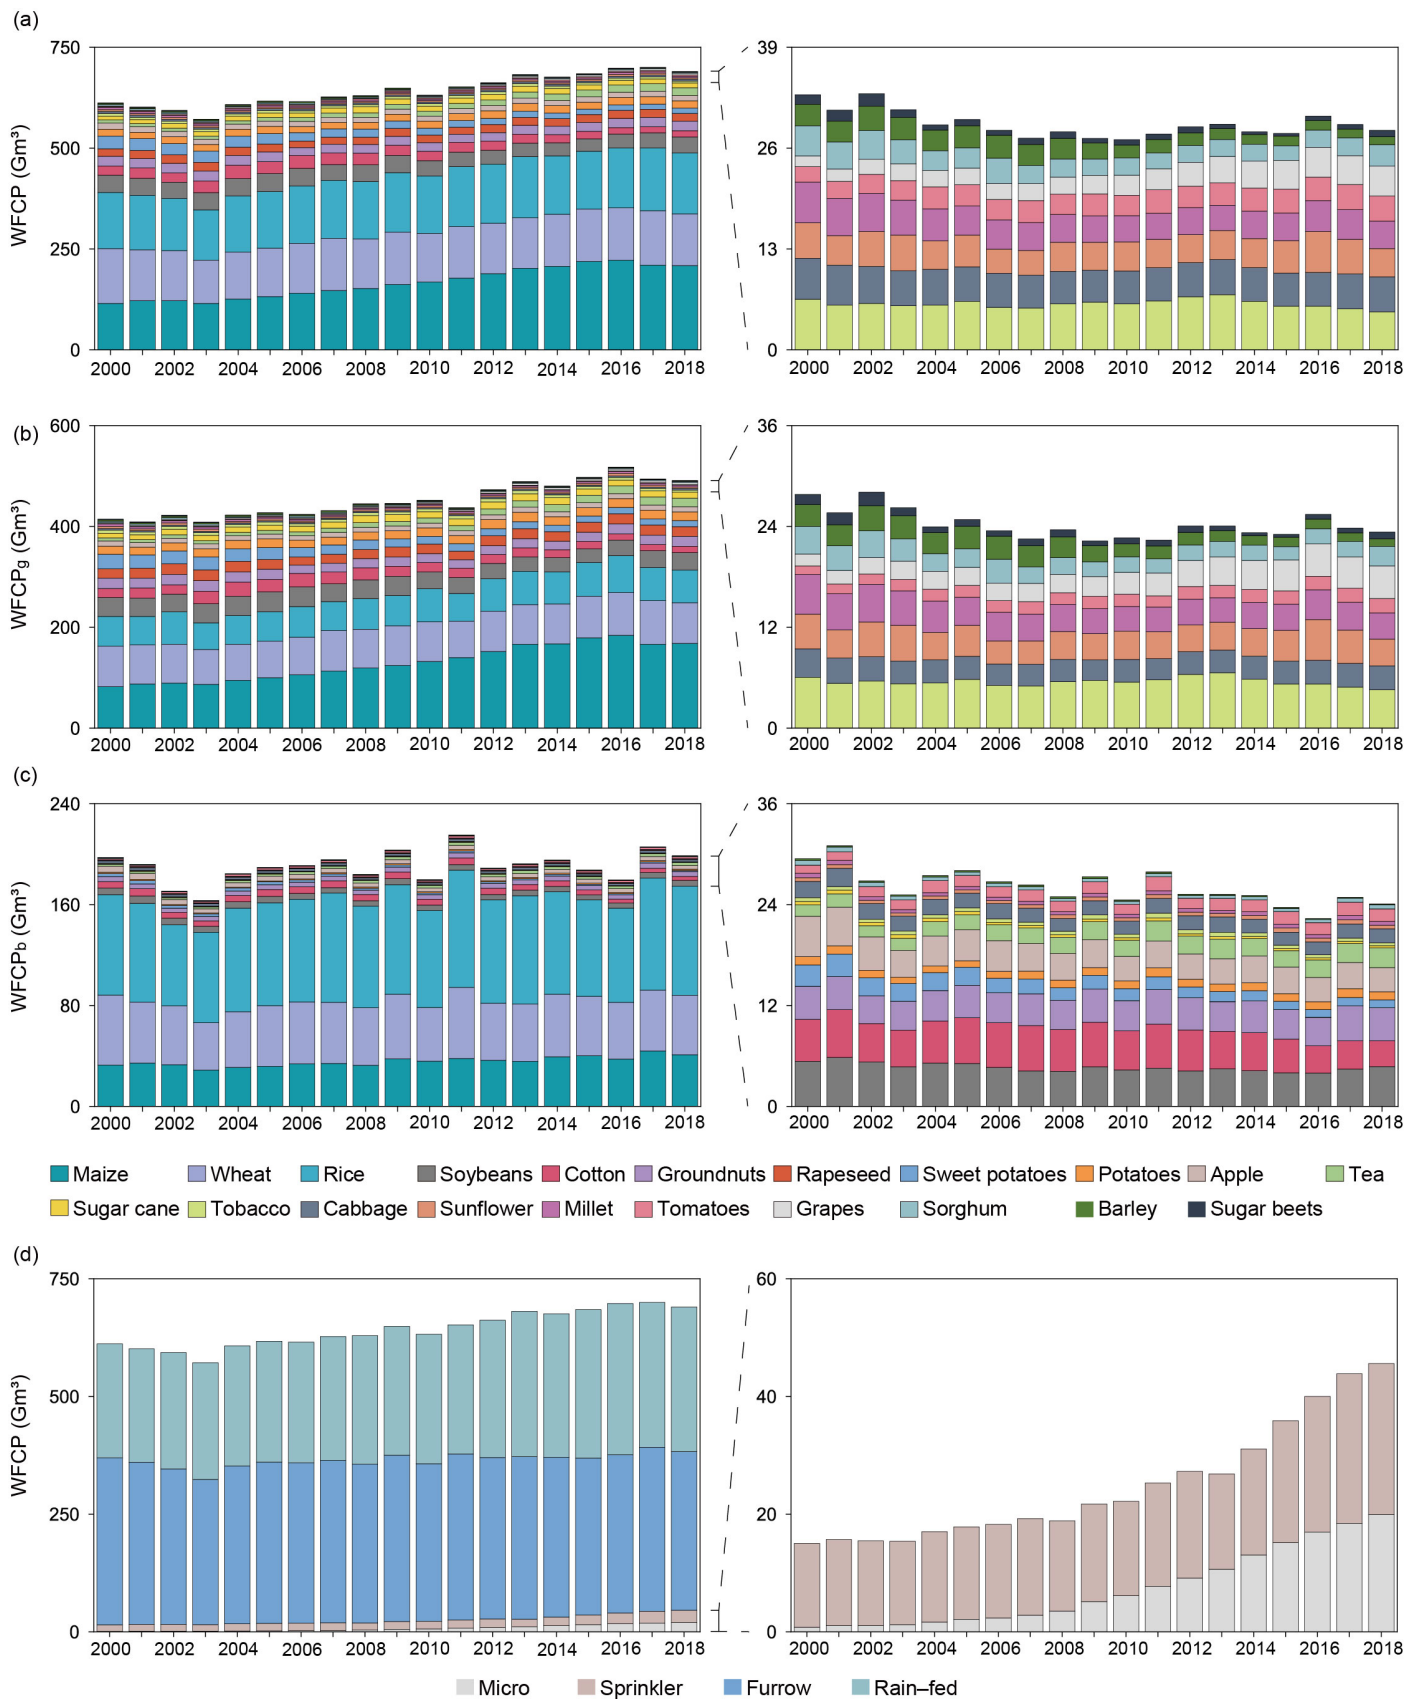

Fig. S1 The WFCP (a), WFCPg (b), WFCPb (c) of 21 crops, and total WFCP under different water supply and irrigation practices (d).

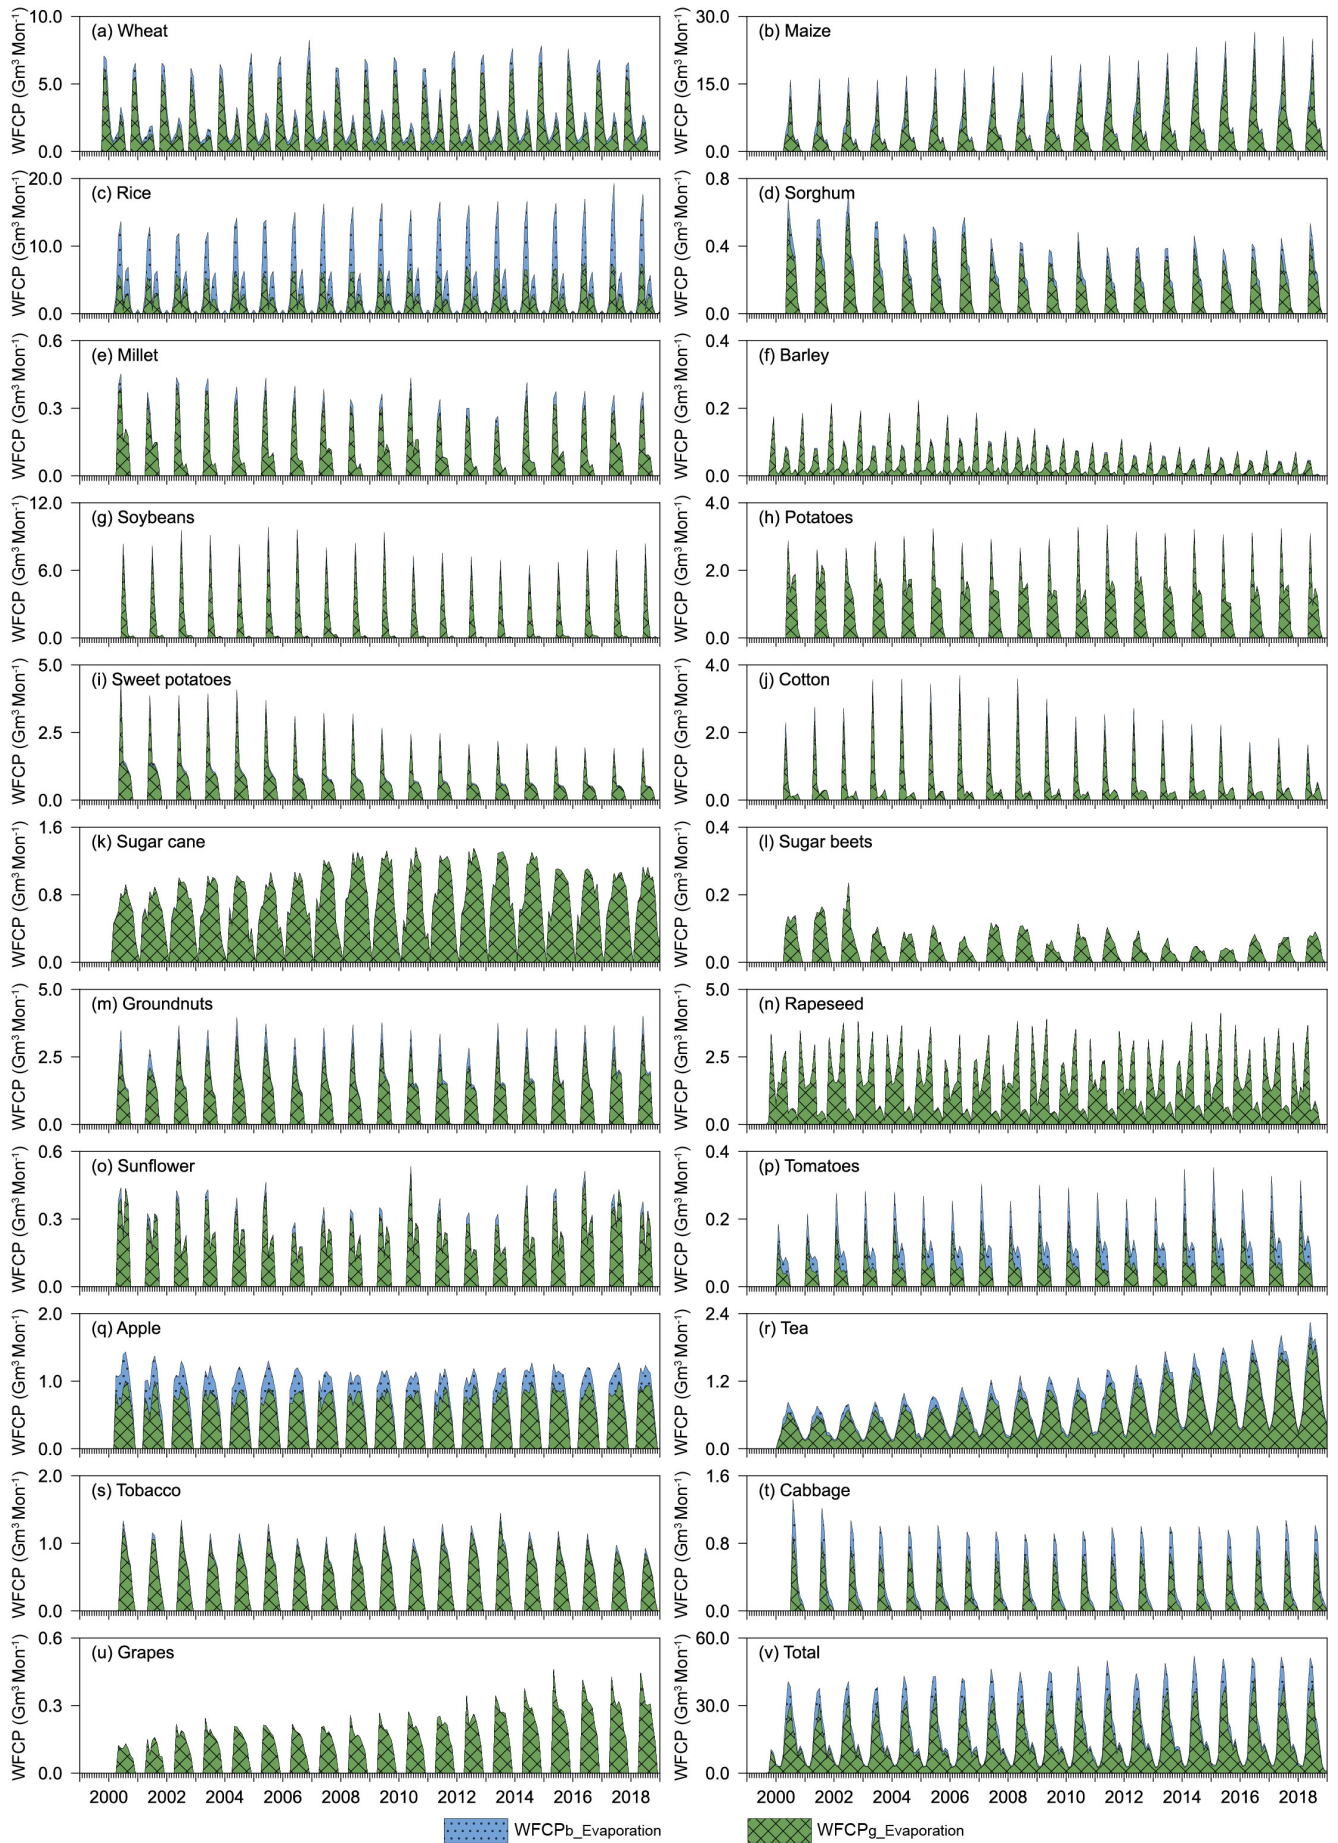

Fig. S2 Total national monthly WFCPg and WFCPb in soil evaporation (cross filling represents WFCPg, dot filling indicates WFCPb).



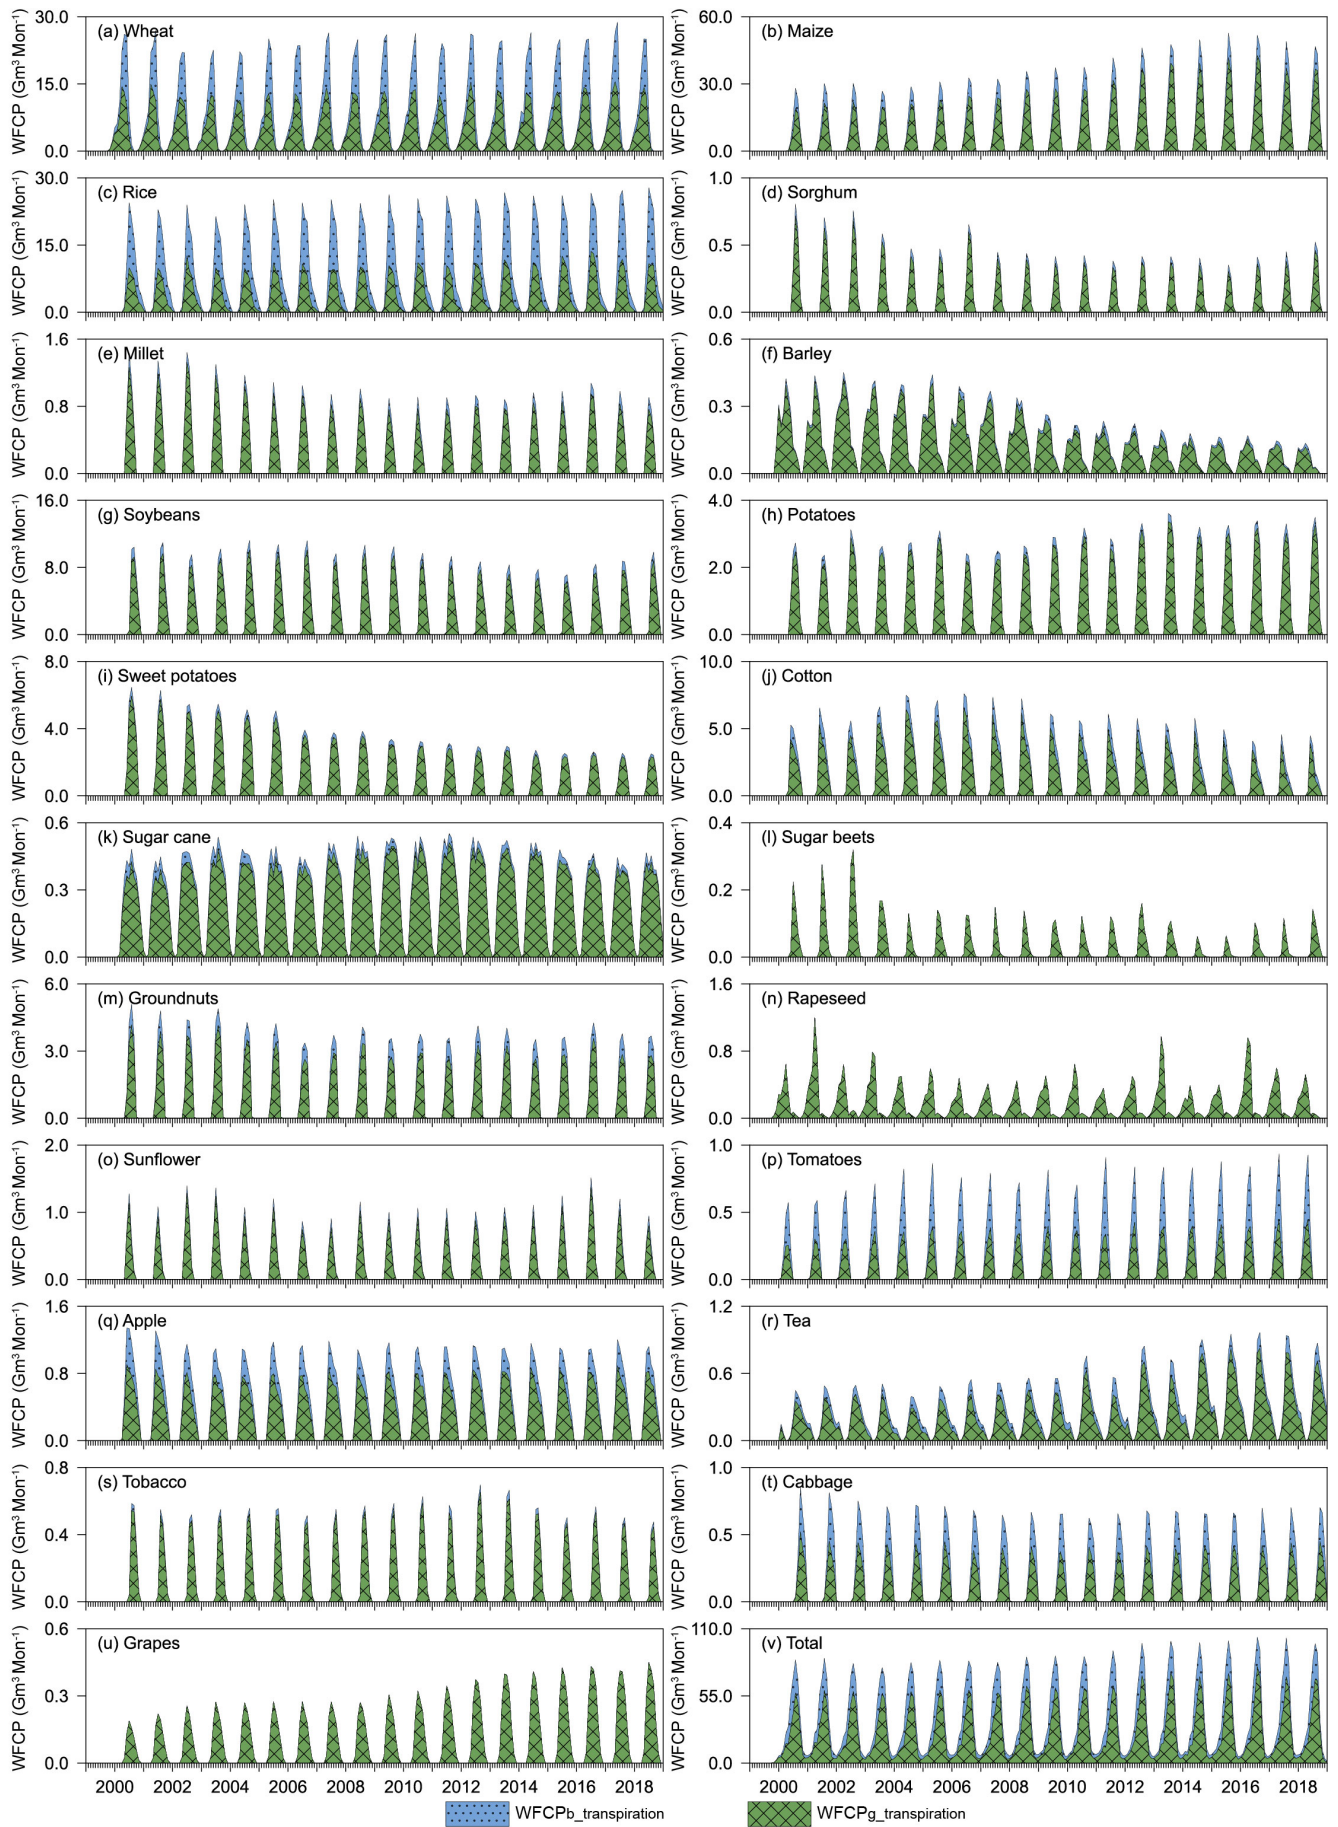

Fig. S3 Total national monthly WFCPg and WFCPb in crop transpiration (cross filling represents WFCPg, dot filling indicates WFCPb).

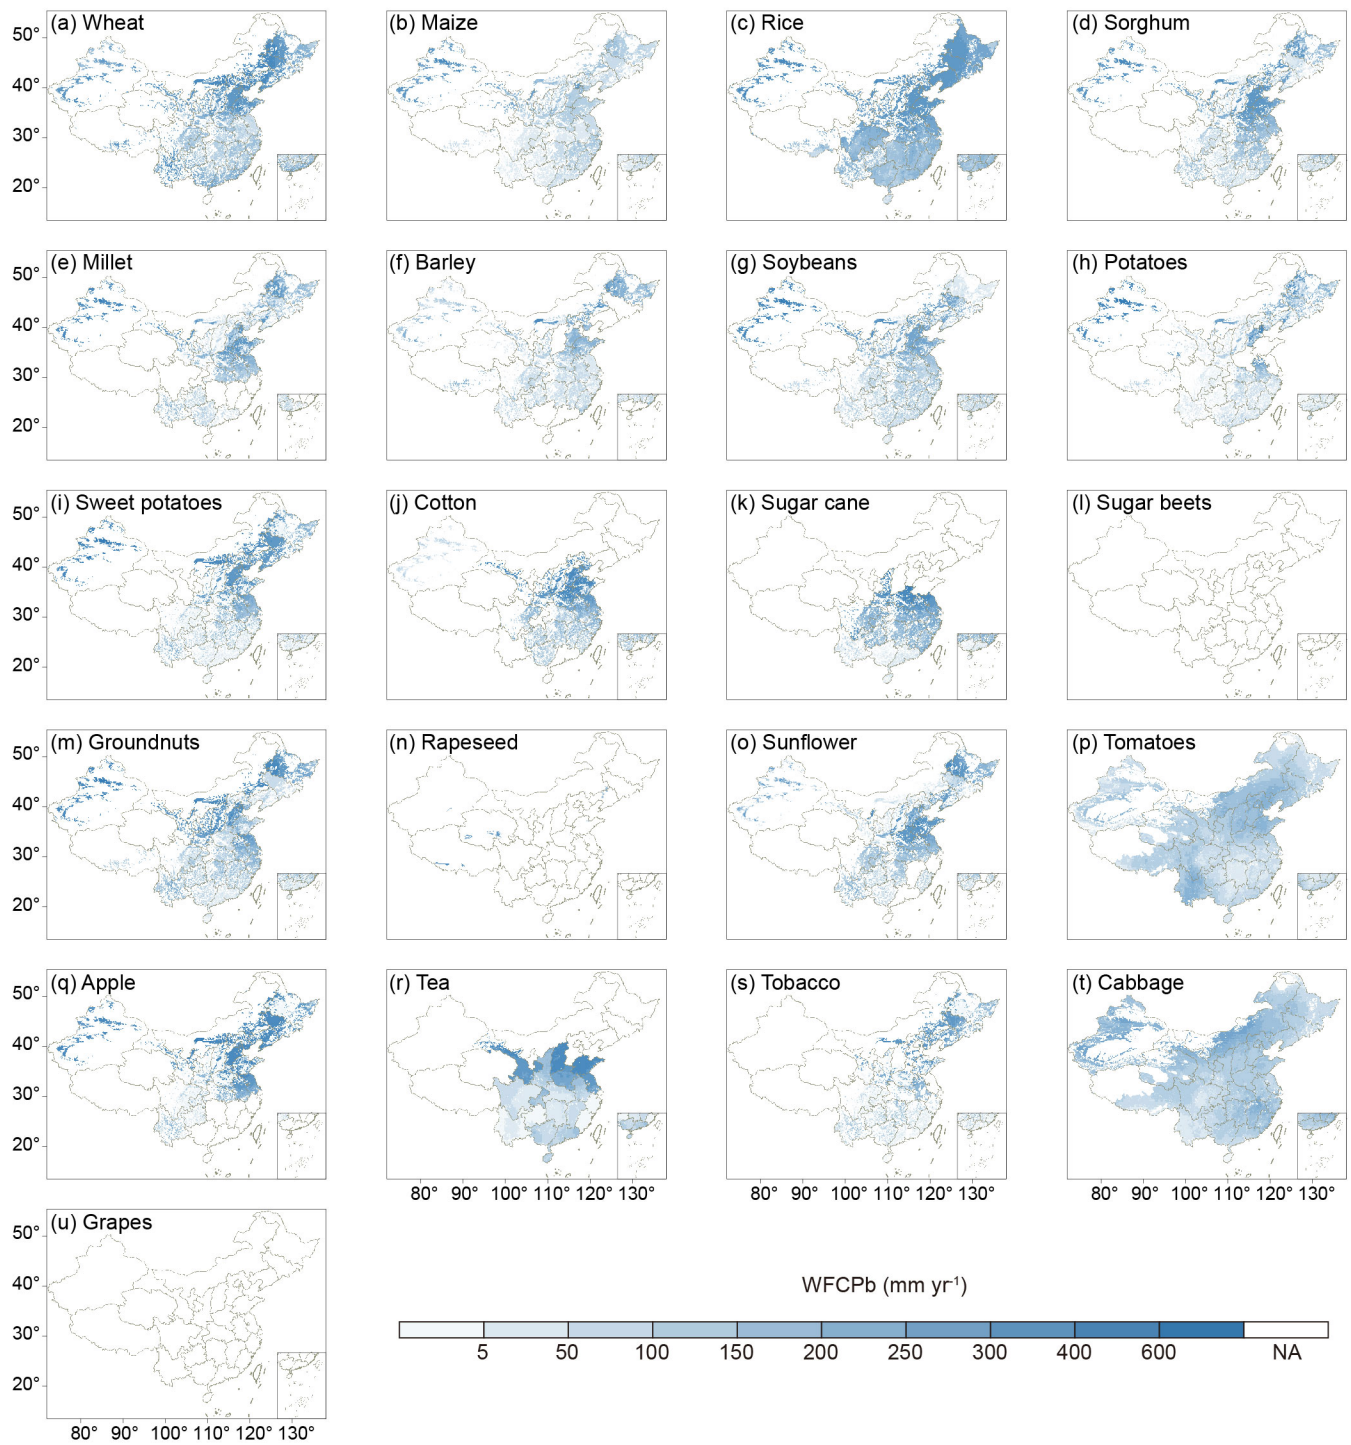

**Fig. S4 Gridded WFCPb and WFCPg in 2017.**



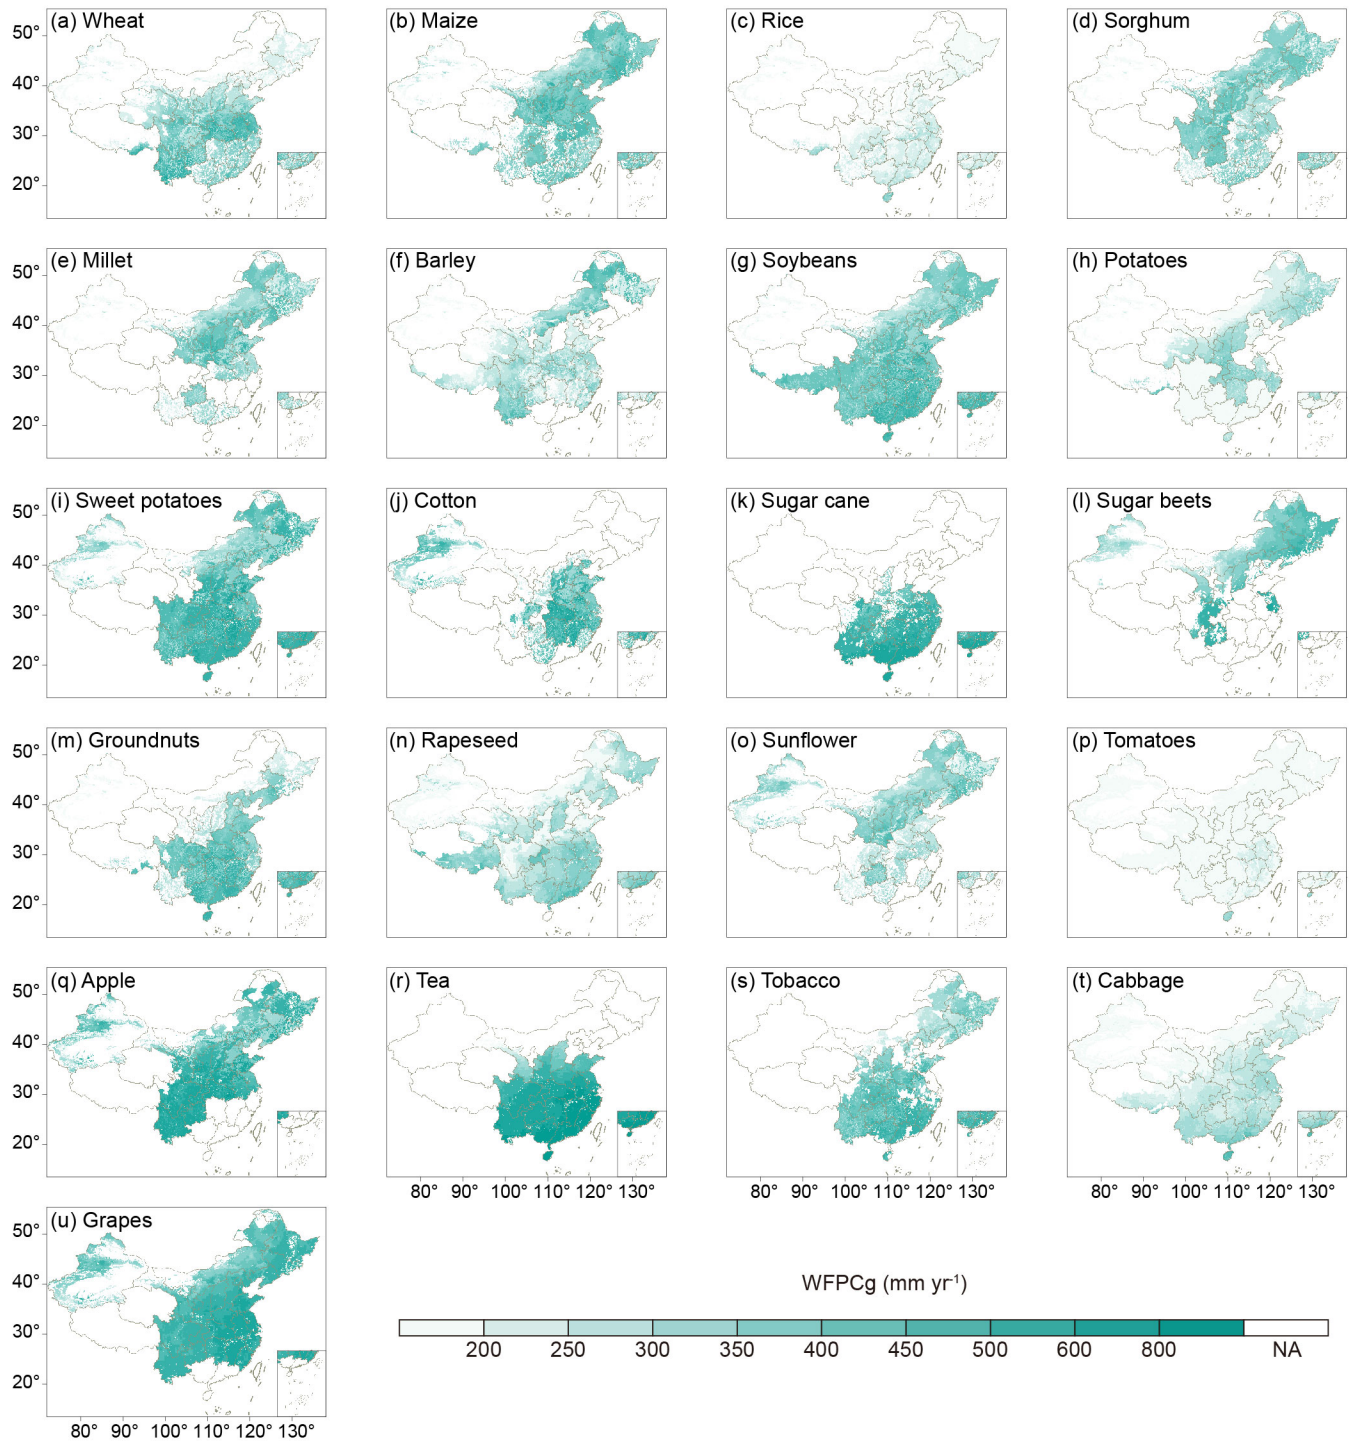

**Fig. S5 Gridded WFCPg and WFCPg in 2017.**

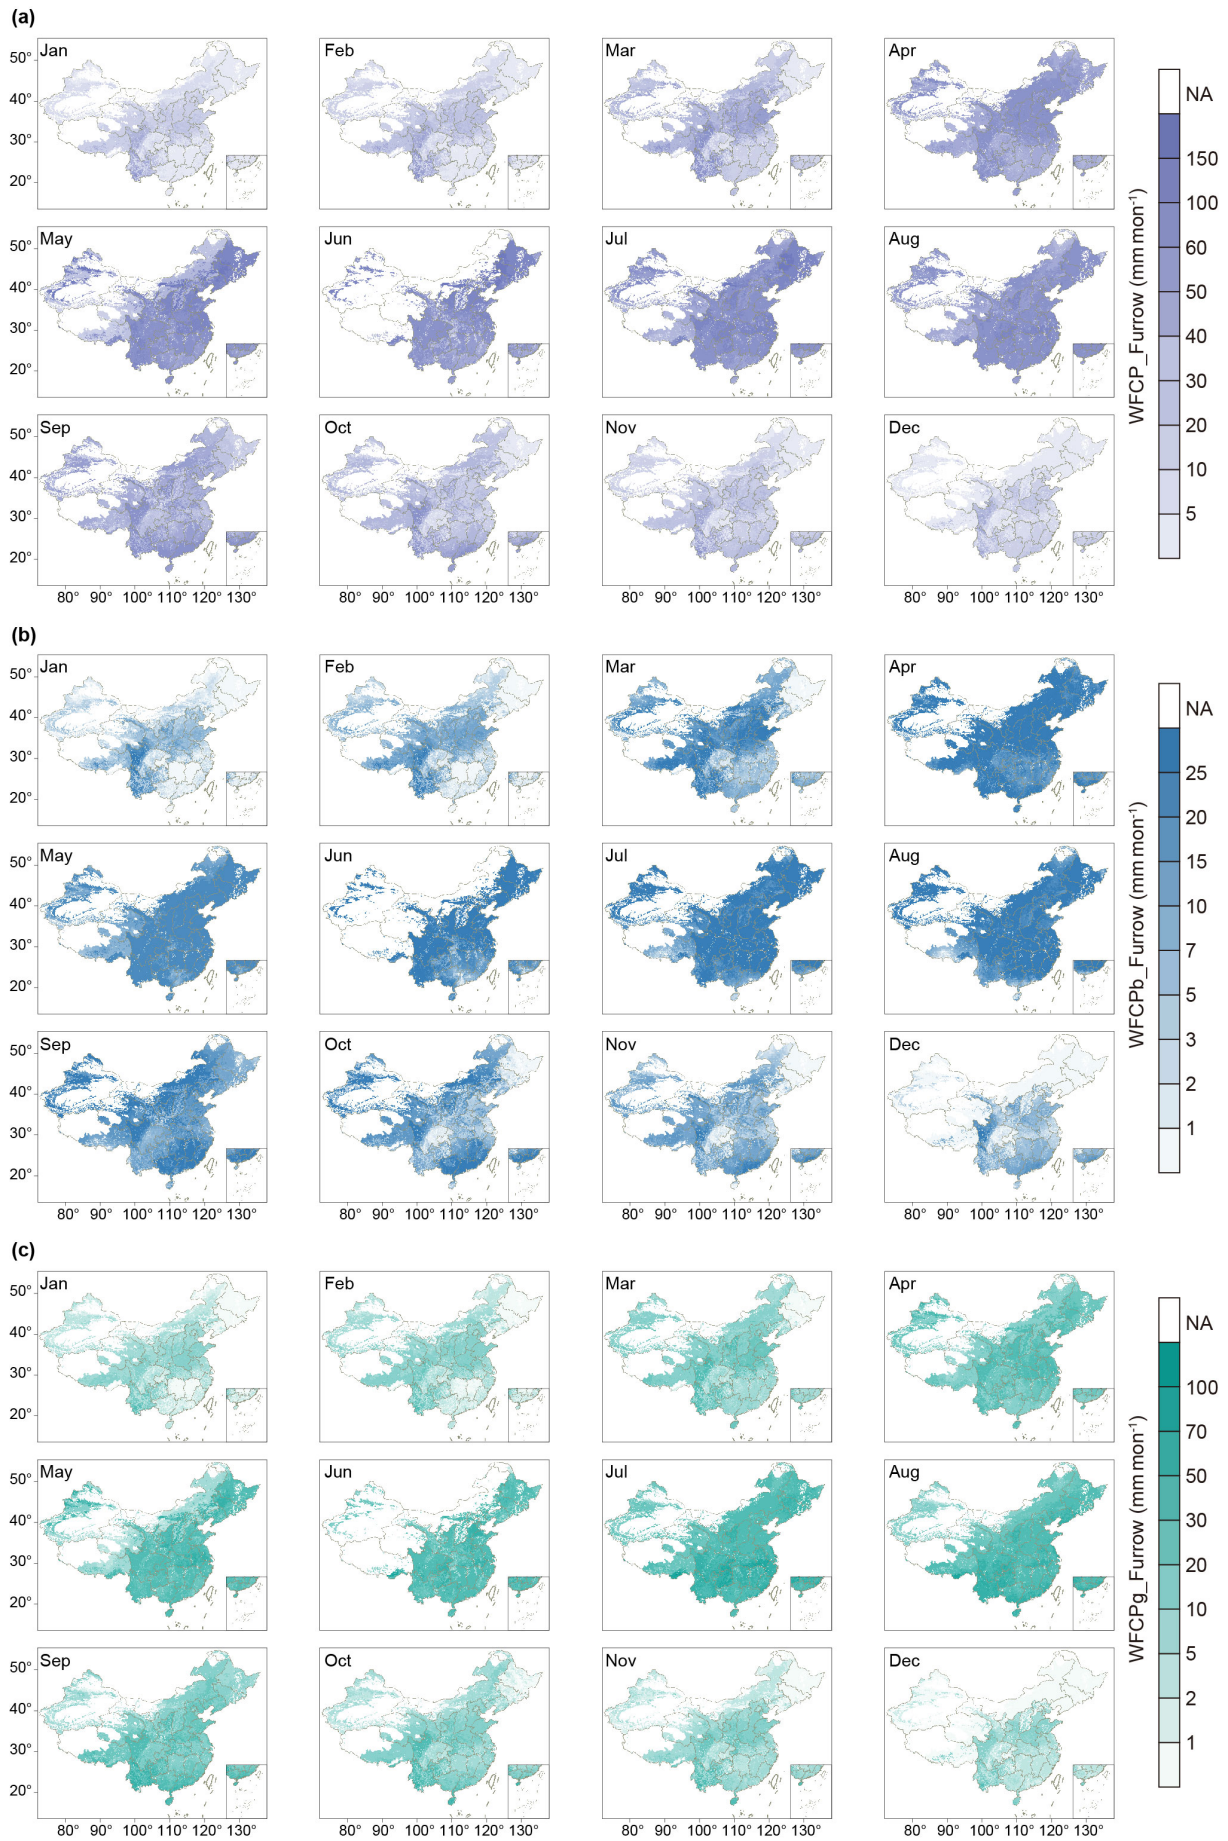

Fig. S6 Gridded monthly total WFCP (a), WFCPb (b) and WFCPg (c) of 21 crops in furrow irrigation in 2017.



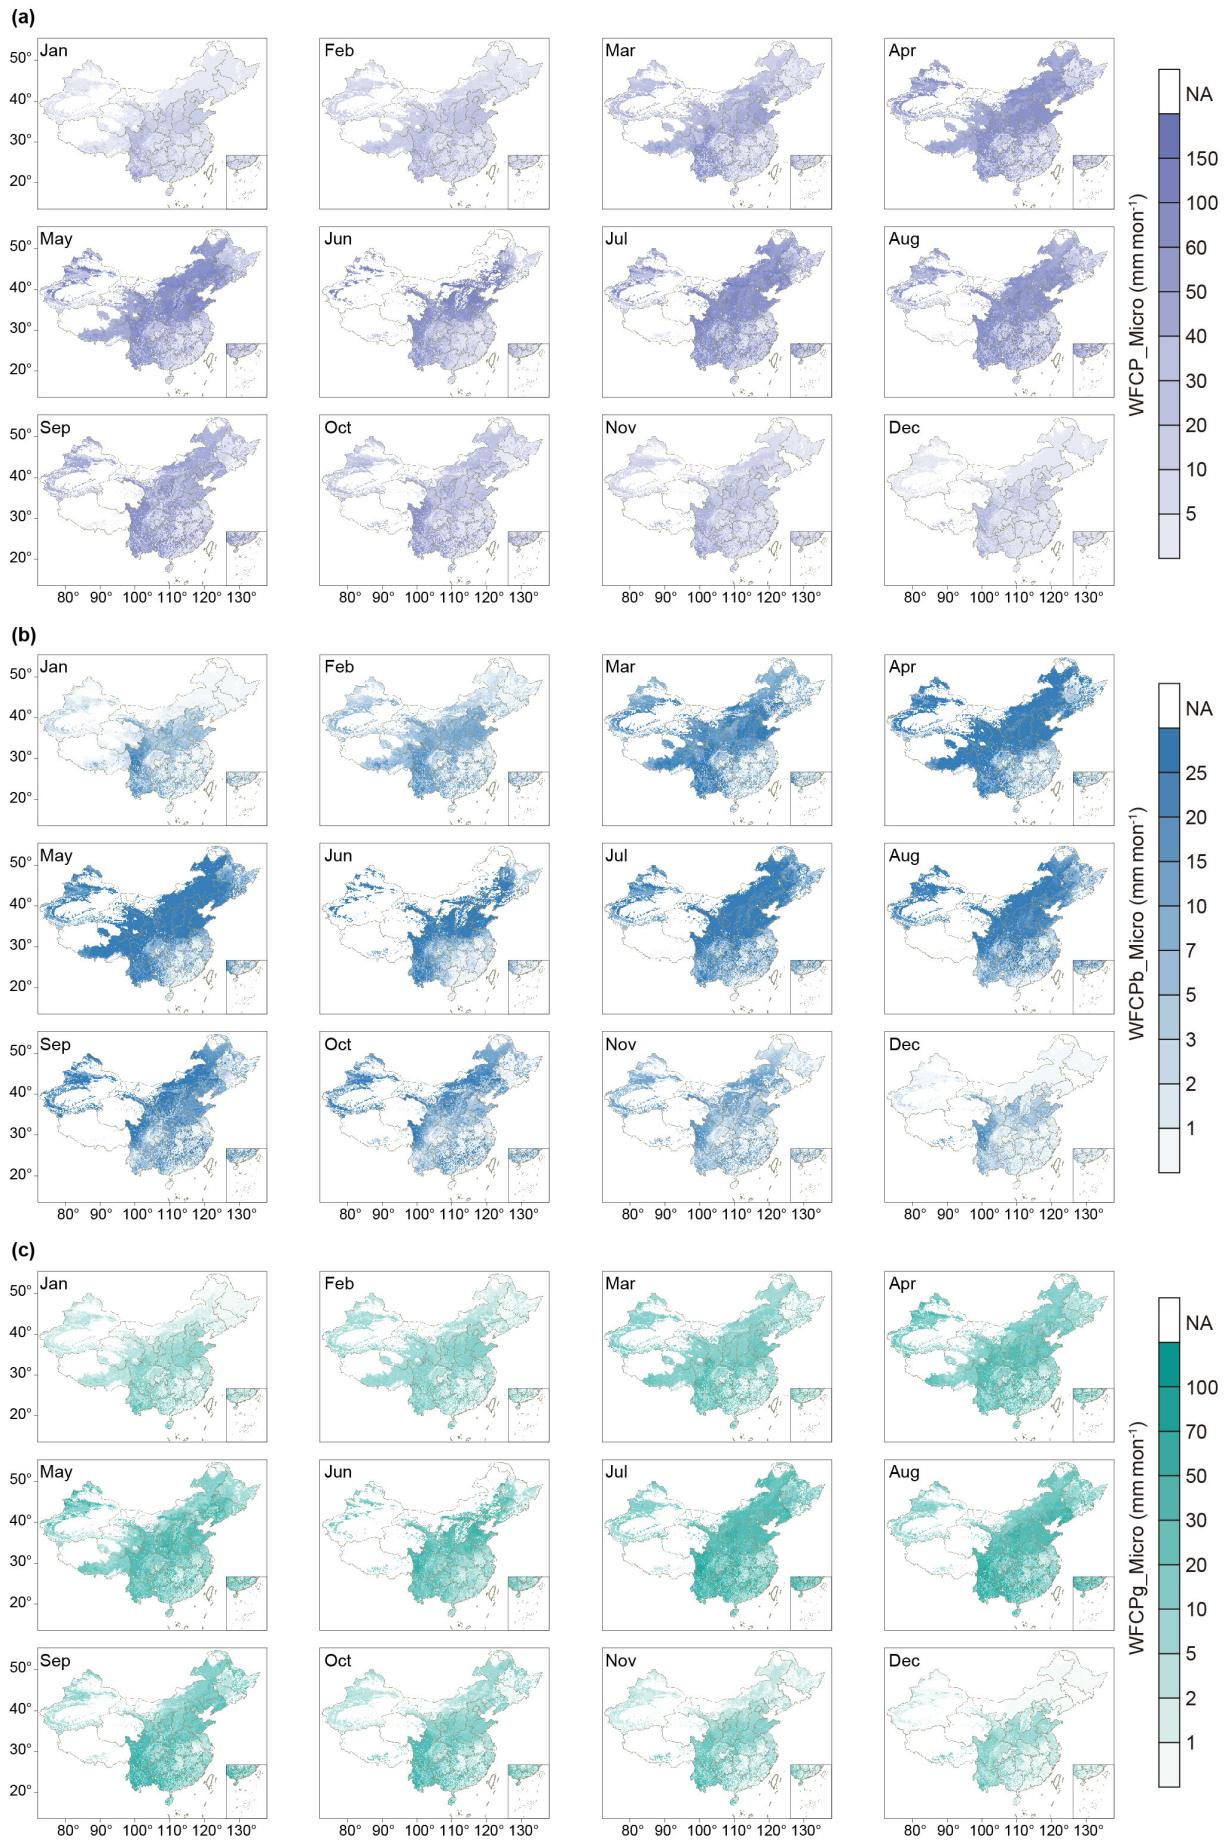

**Fig. S7** Gridded monthly total WFCP (a), WFCPb (b) and WFCPg (c) of 21 crops in micro irrigation in 2017.

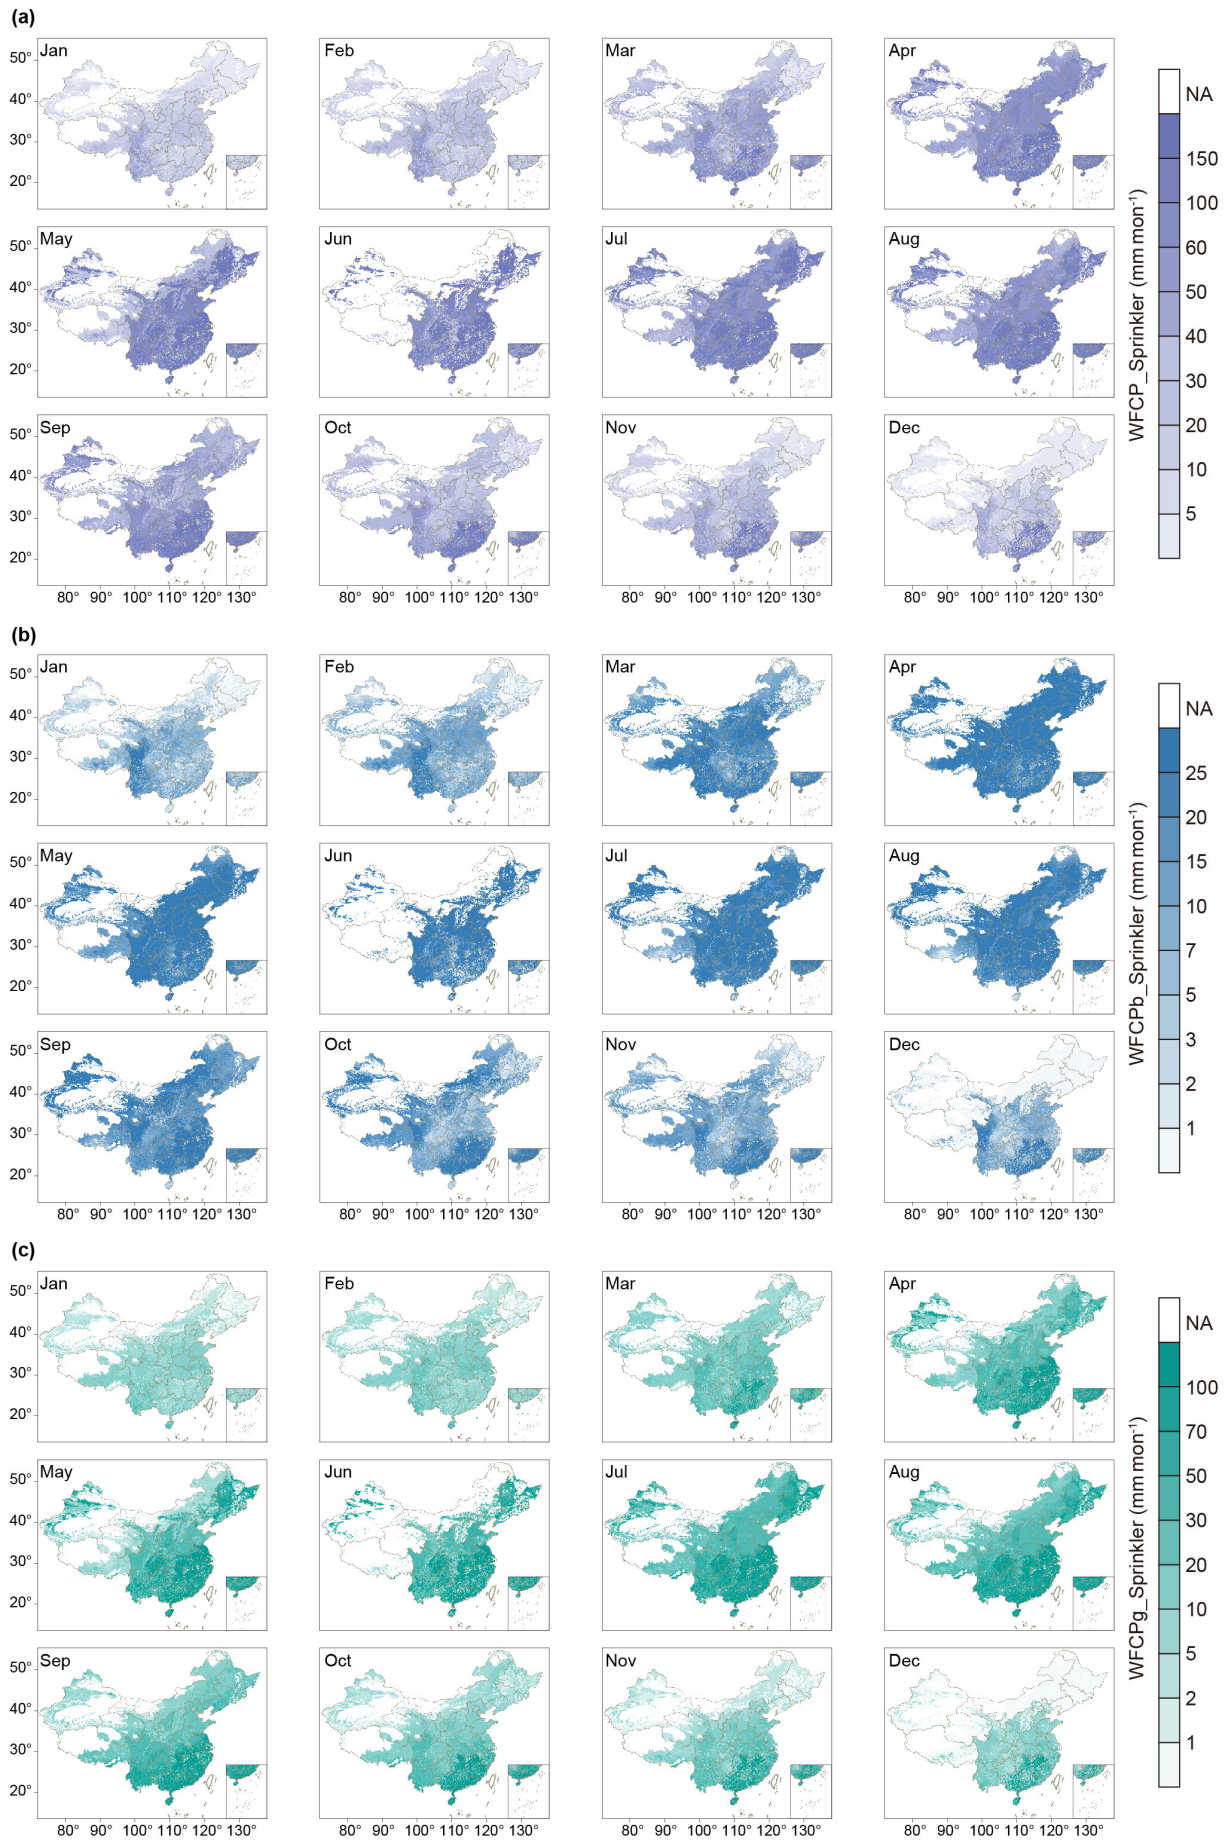

Fig. S8 Gridded monthly total WFCP (a), WFCPb (b) and WFCPg (c) of 21 crops in sprinkler irrigation in 2017.



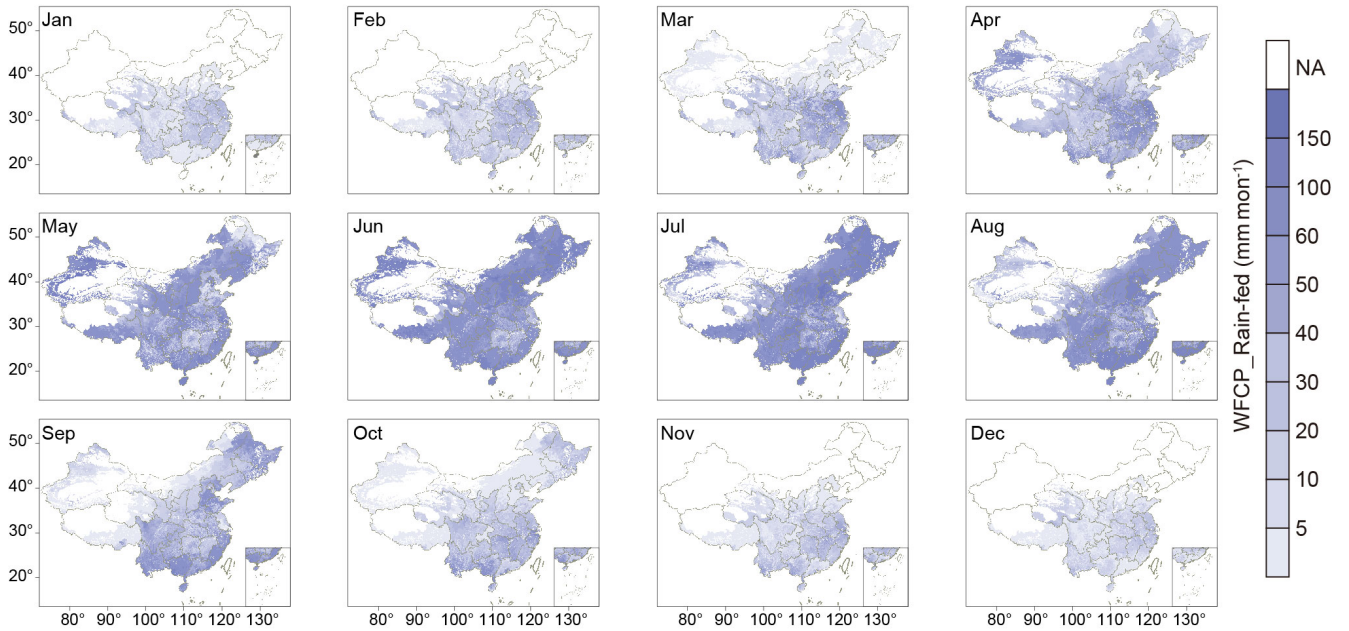

Fig. S9 Gridded monthly total WFCP in rain-fed conditions in 2017.

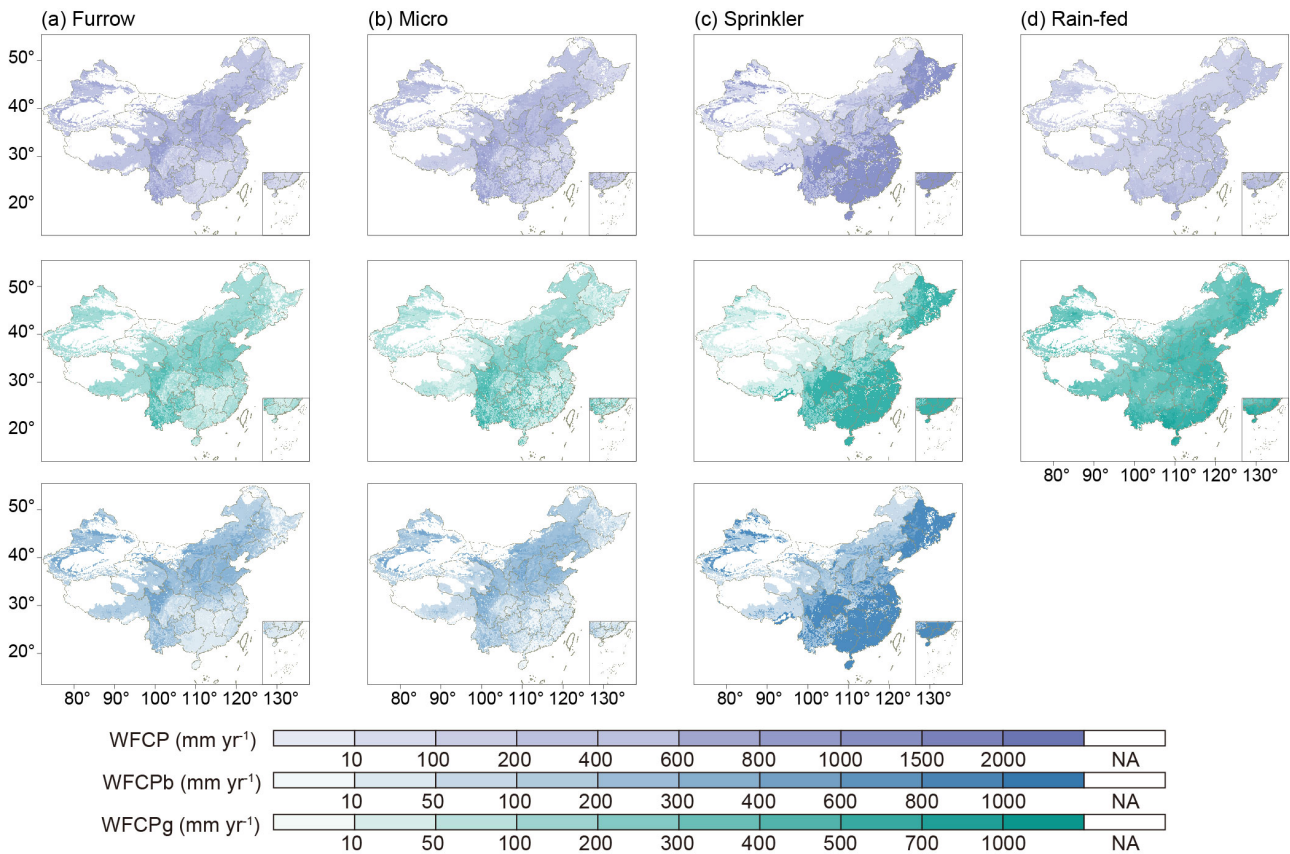

Fig. S10 Gridded monthly total WFCP, WFCPb and WFCPg in furrow irrigation (a), micro irrigation (b), sprinkler irrigation (c) and rain-fed conditions (d) in 2017.

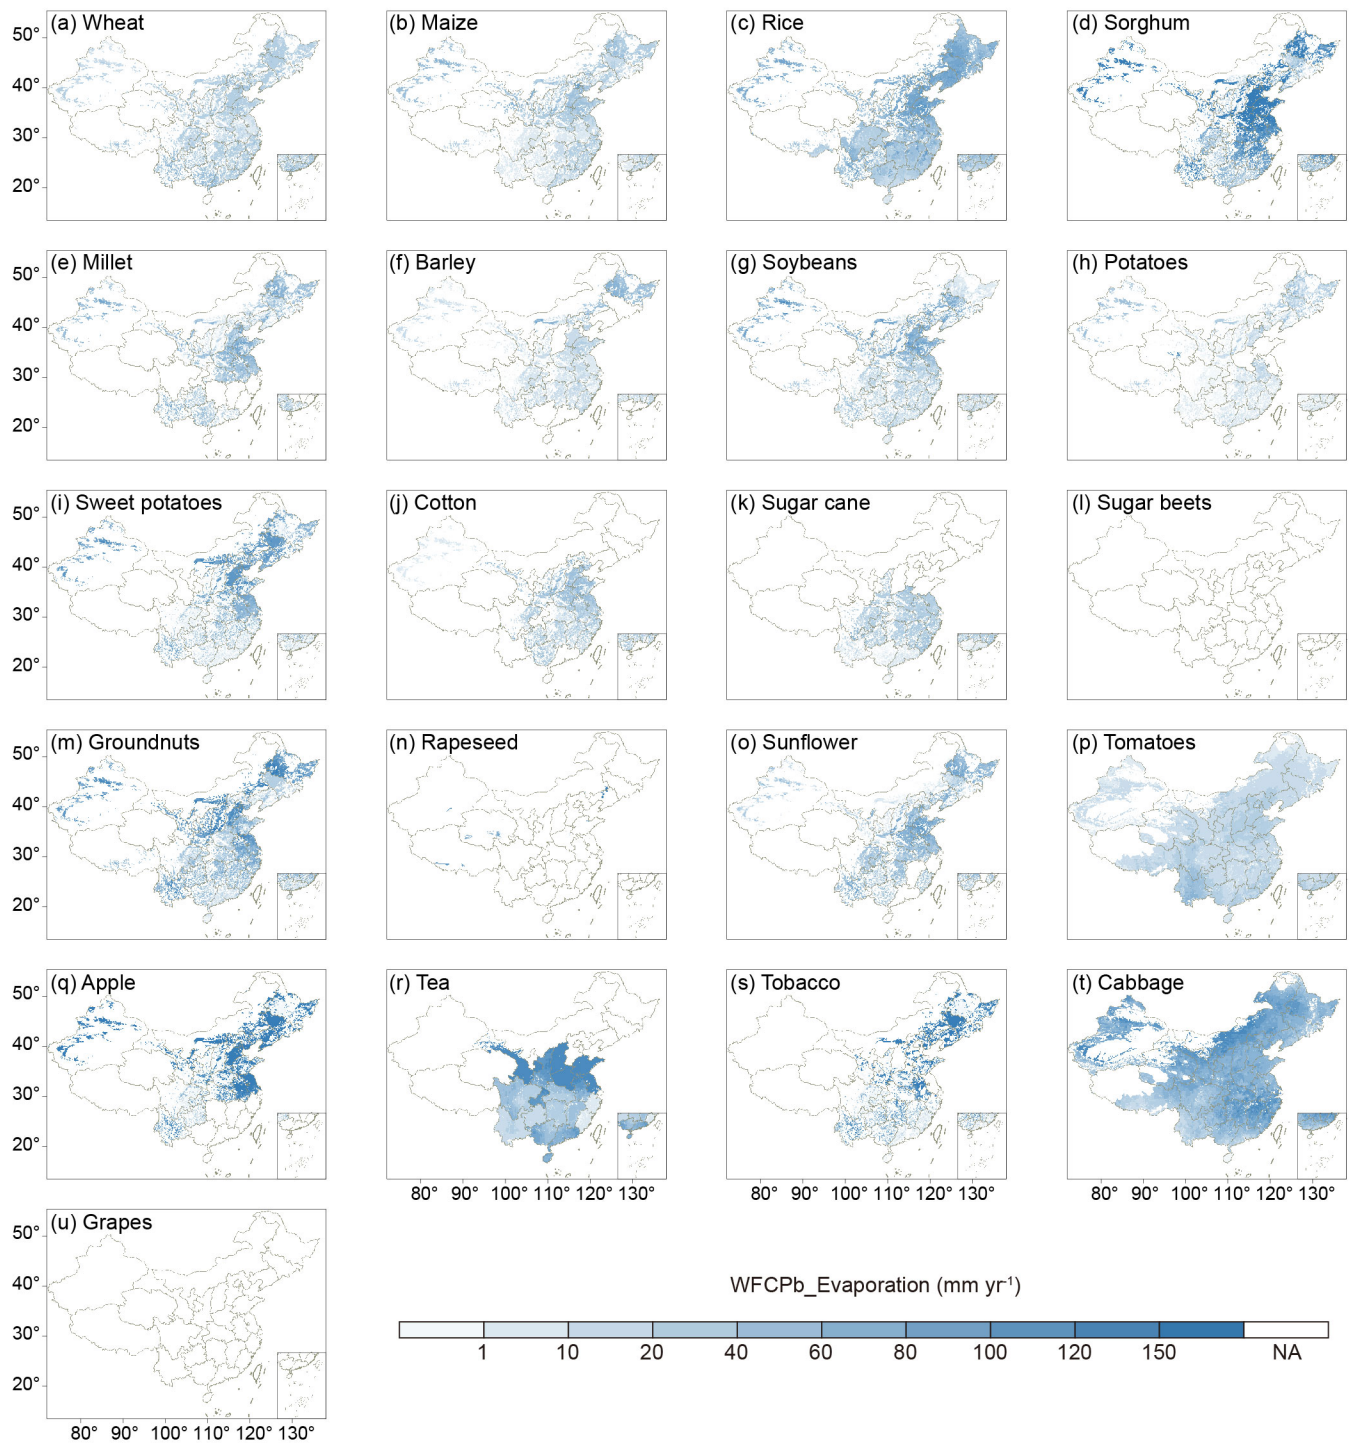

**Fig. S11 Gridded WFCPb in soil evaporation in 2017.**



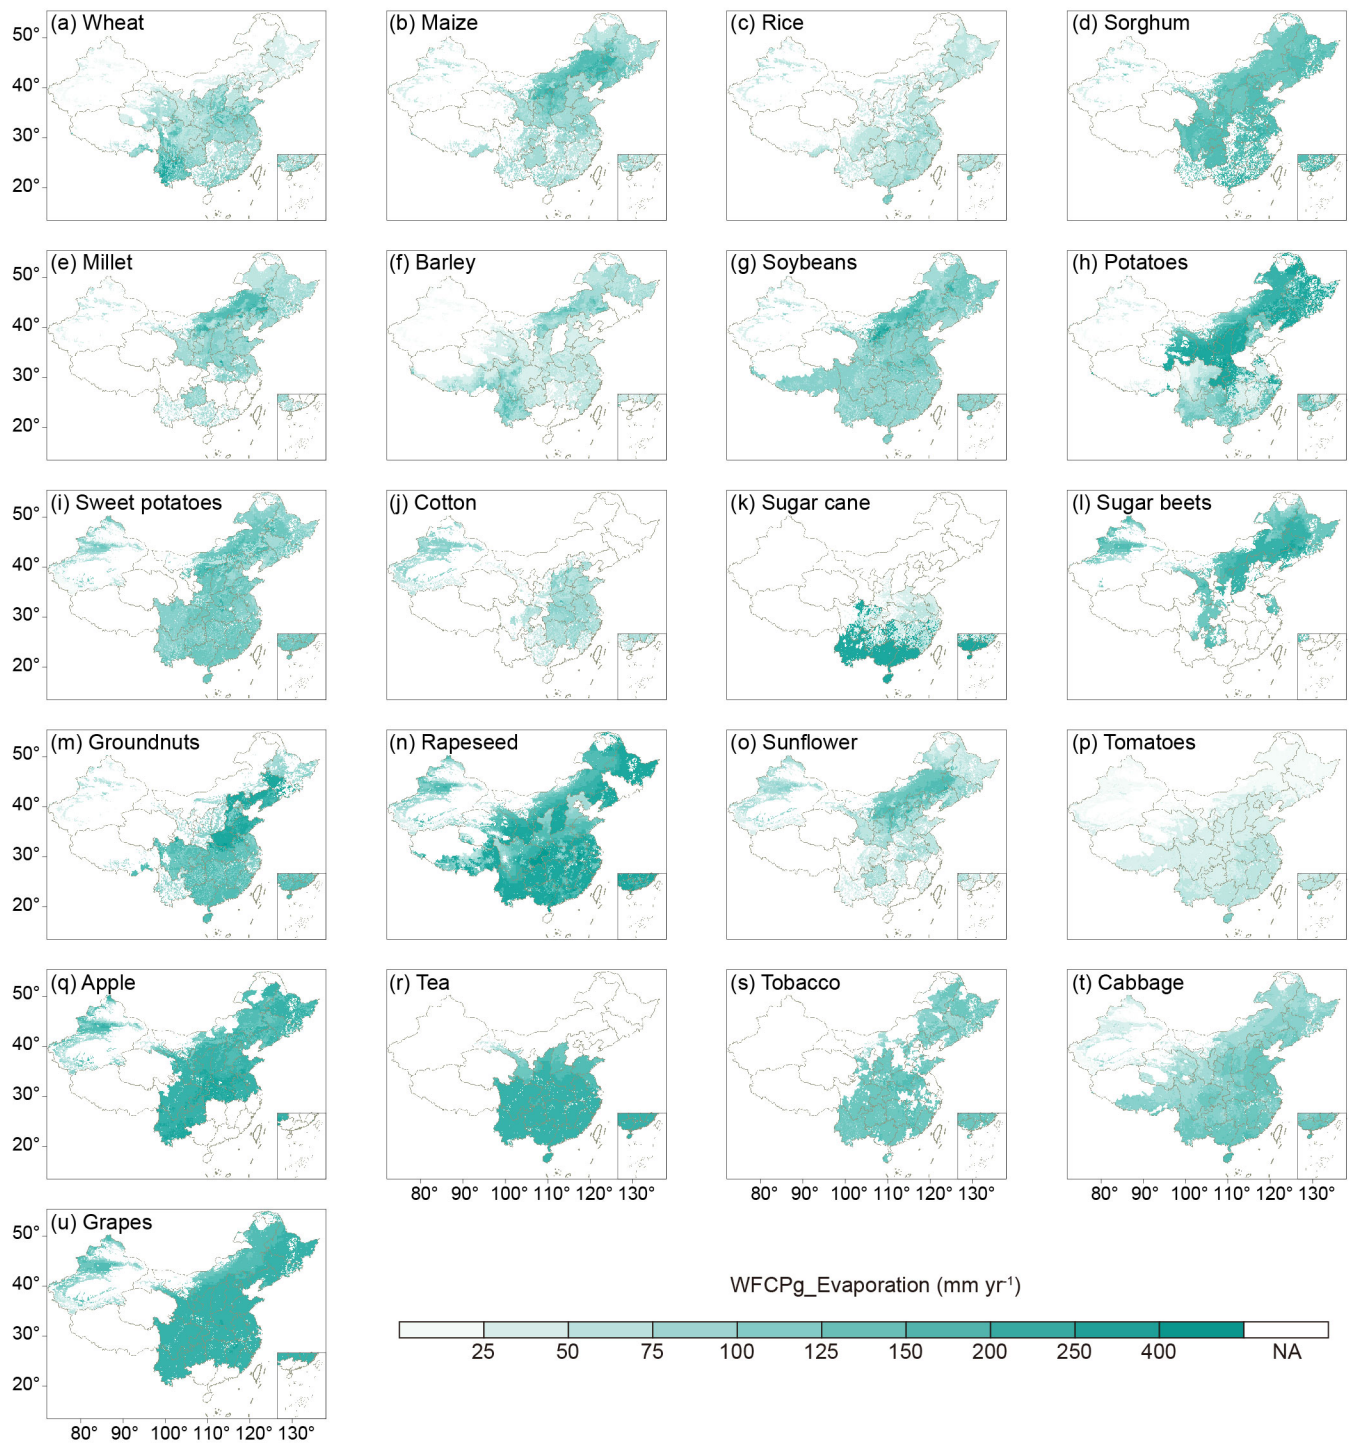

**Fig. S12 Gridded WFCPg in soil evaporation in 2017.**

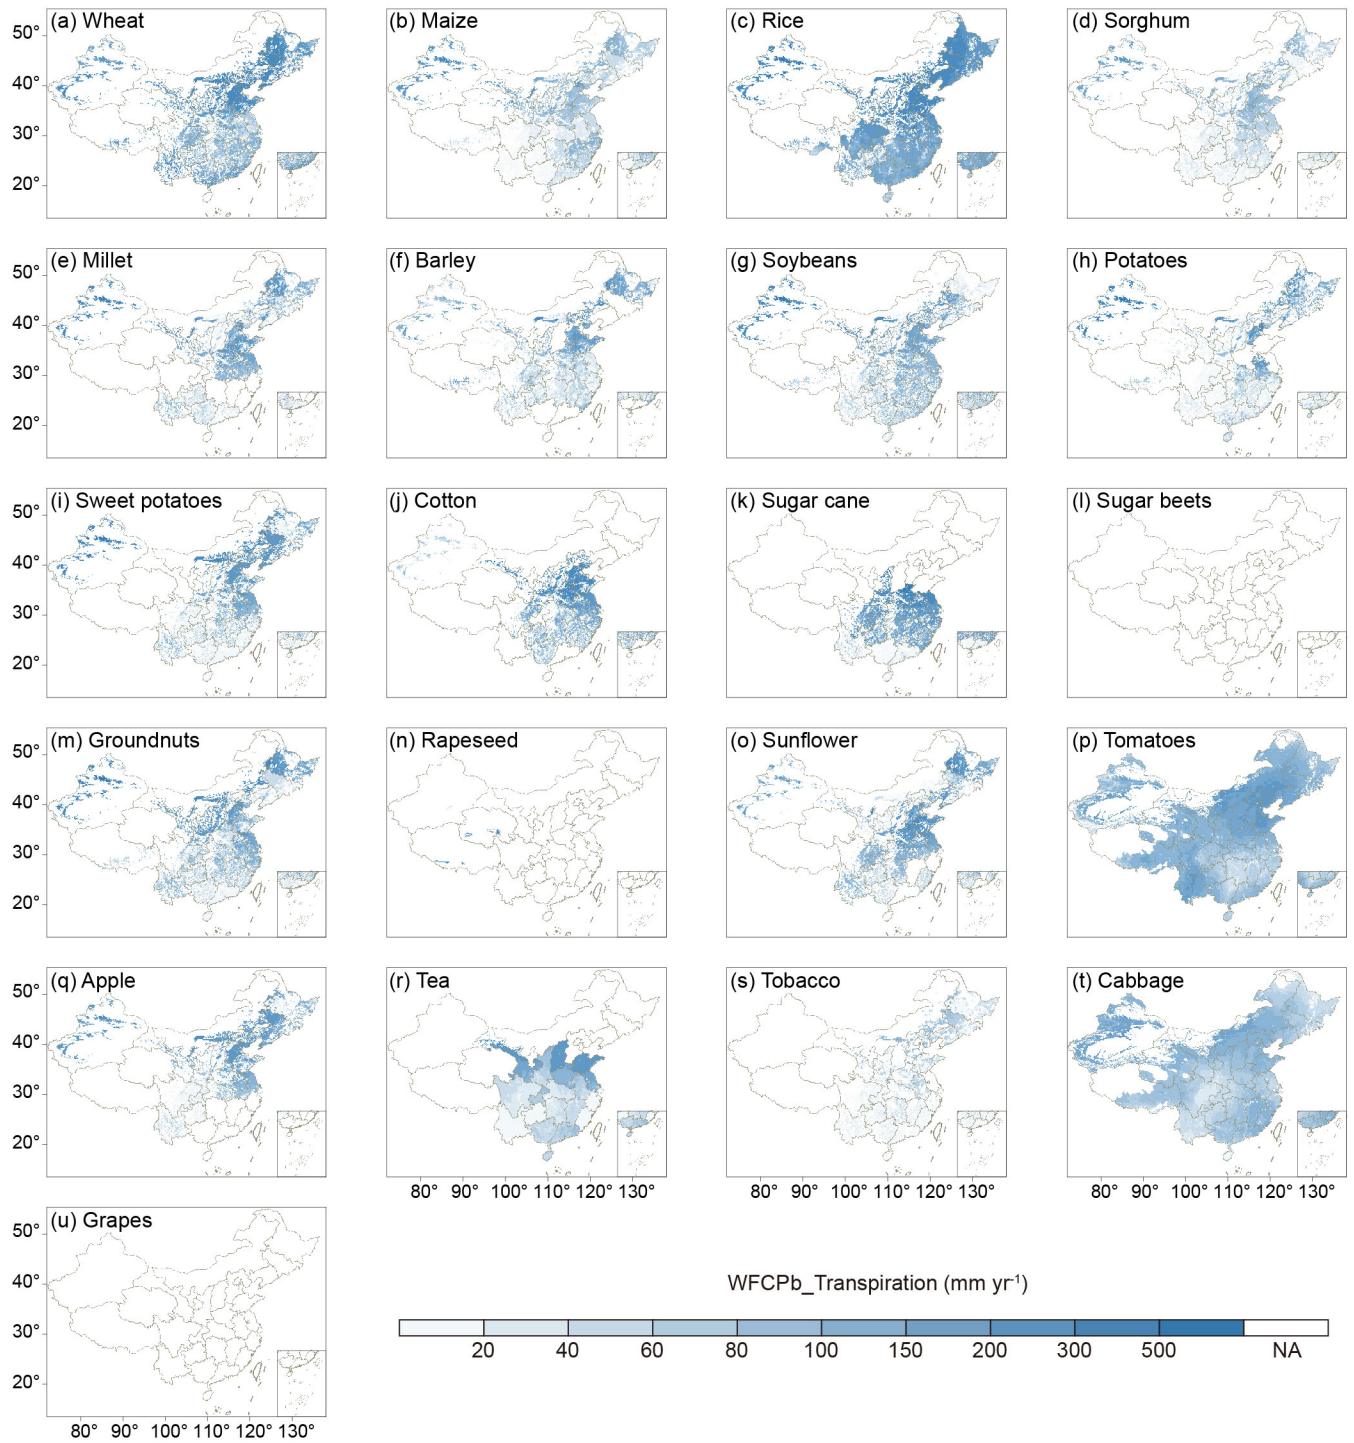

**Fig. S13 Gridded WFCPb in soil transpiration in 2017.**



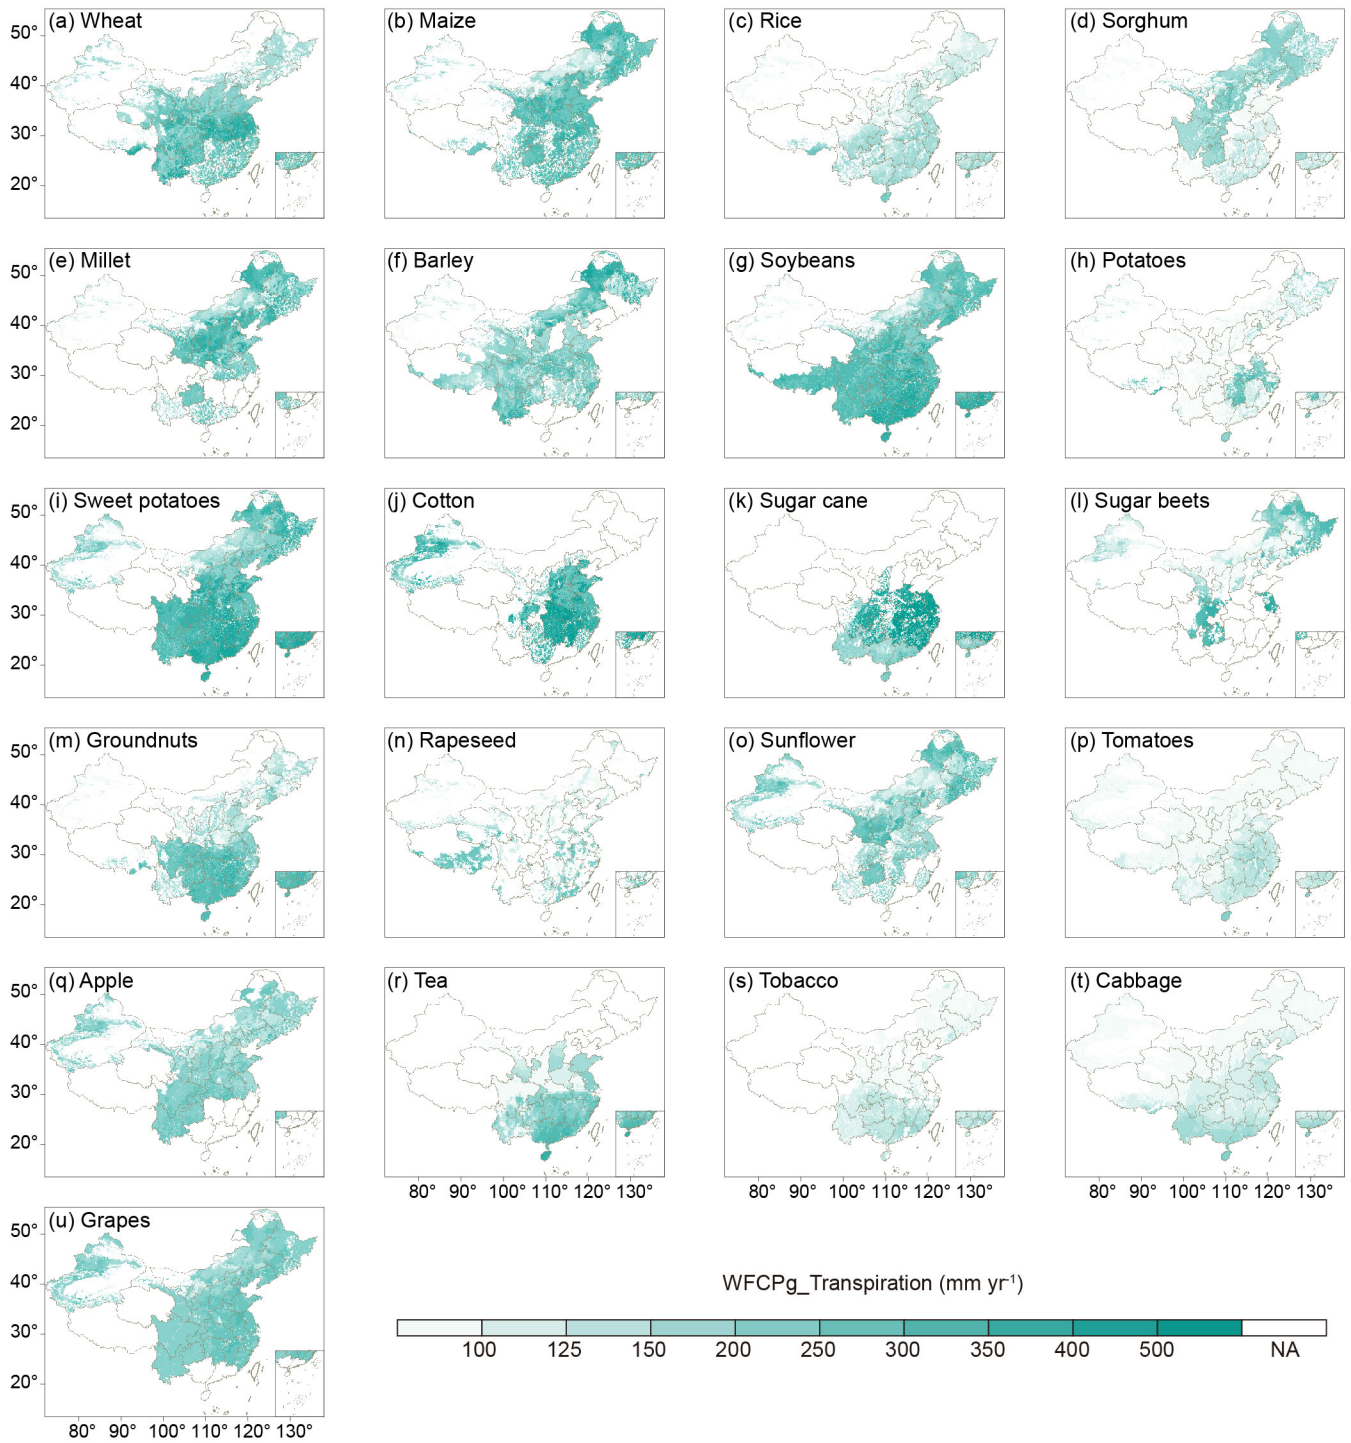

**Fig. S14 Gridded WFCPg in soil crop transpiration in 2017.**

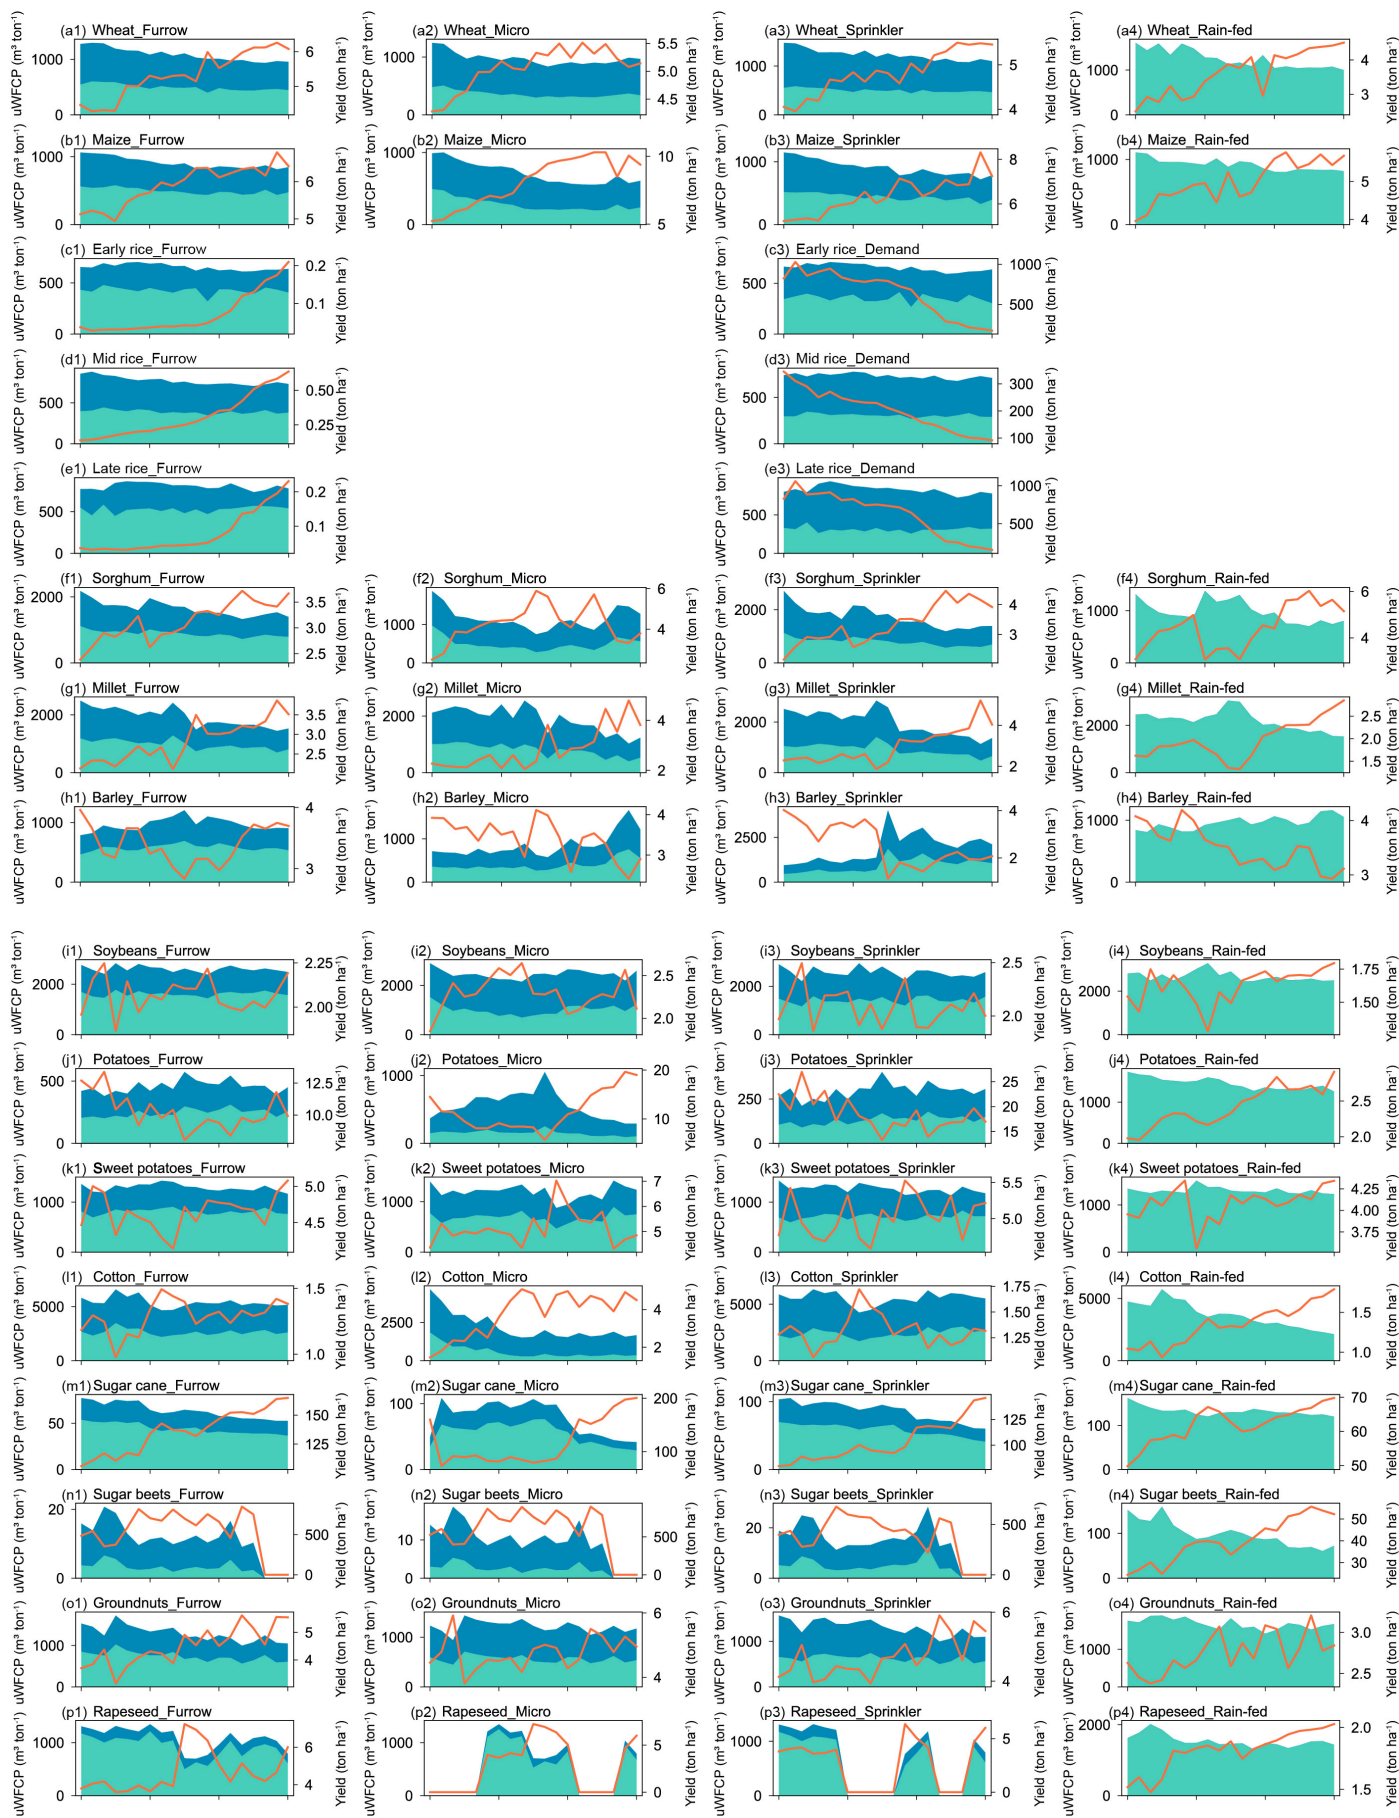

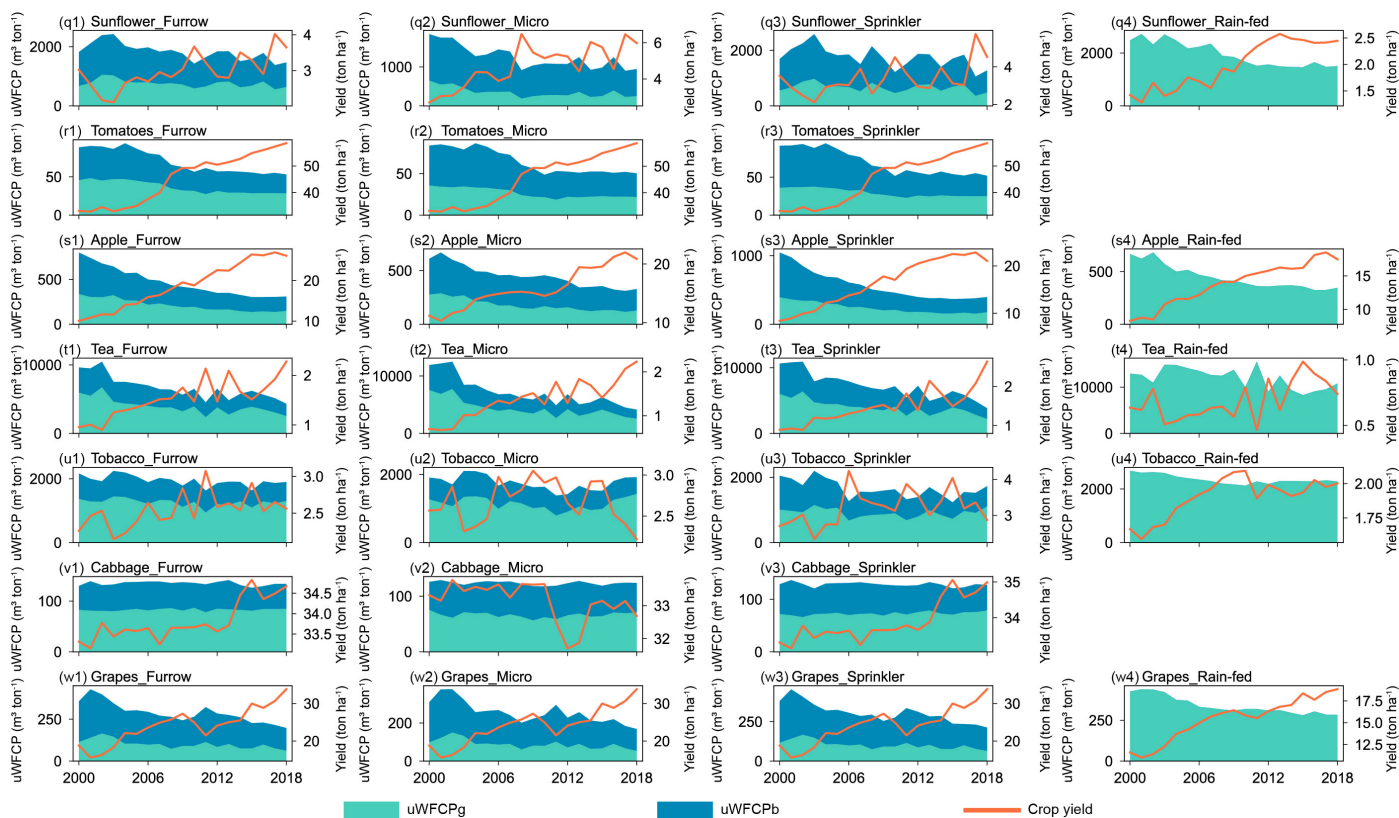

**Fig. S15** Interannual variation in uWFCPb, uWFCPg and yield under different water supply and irrigation practices over 2000-2018.



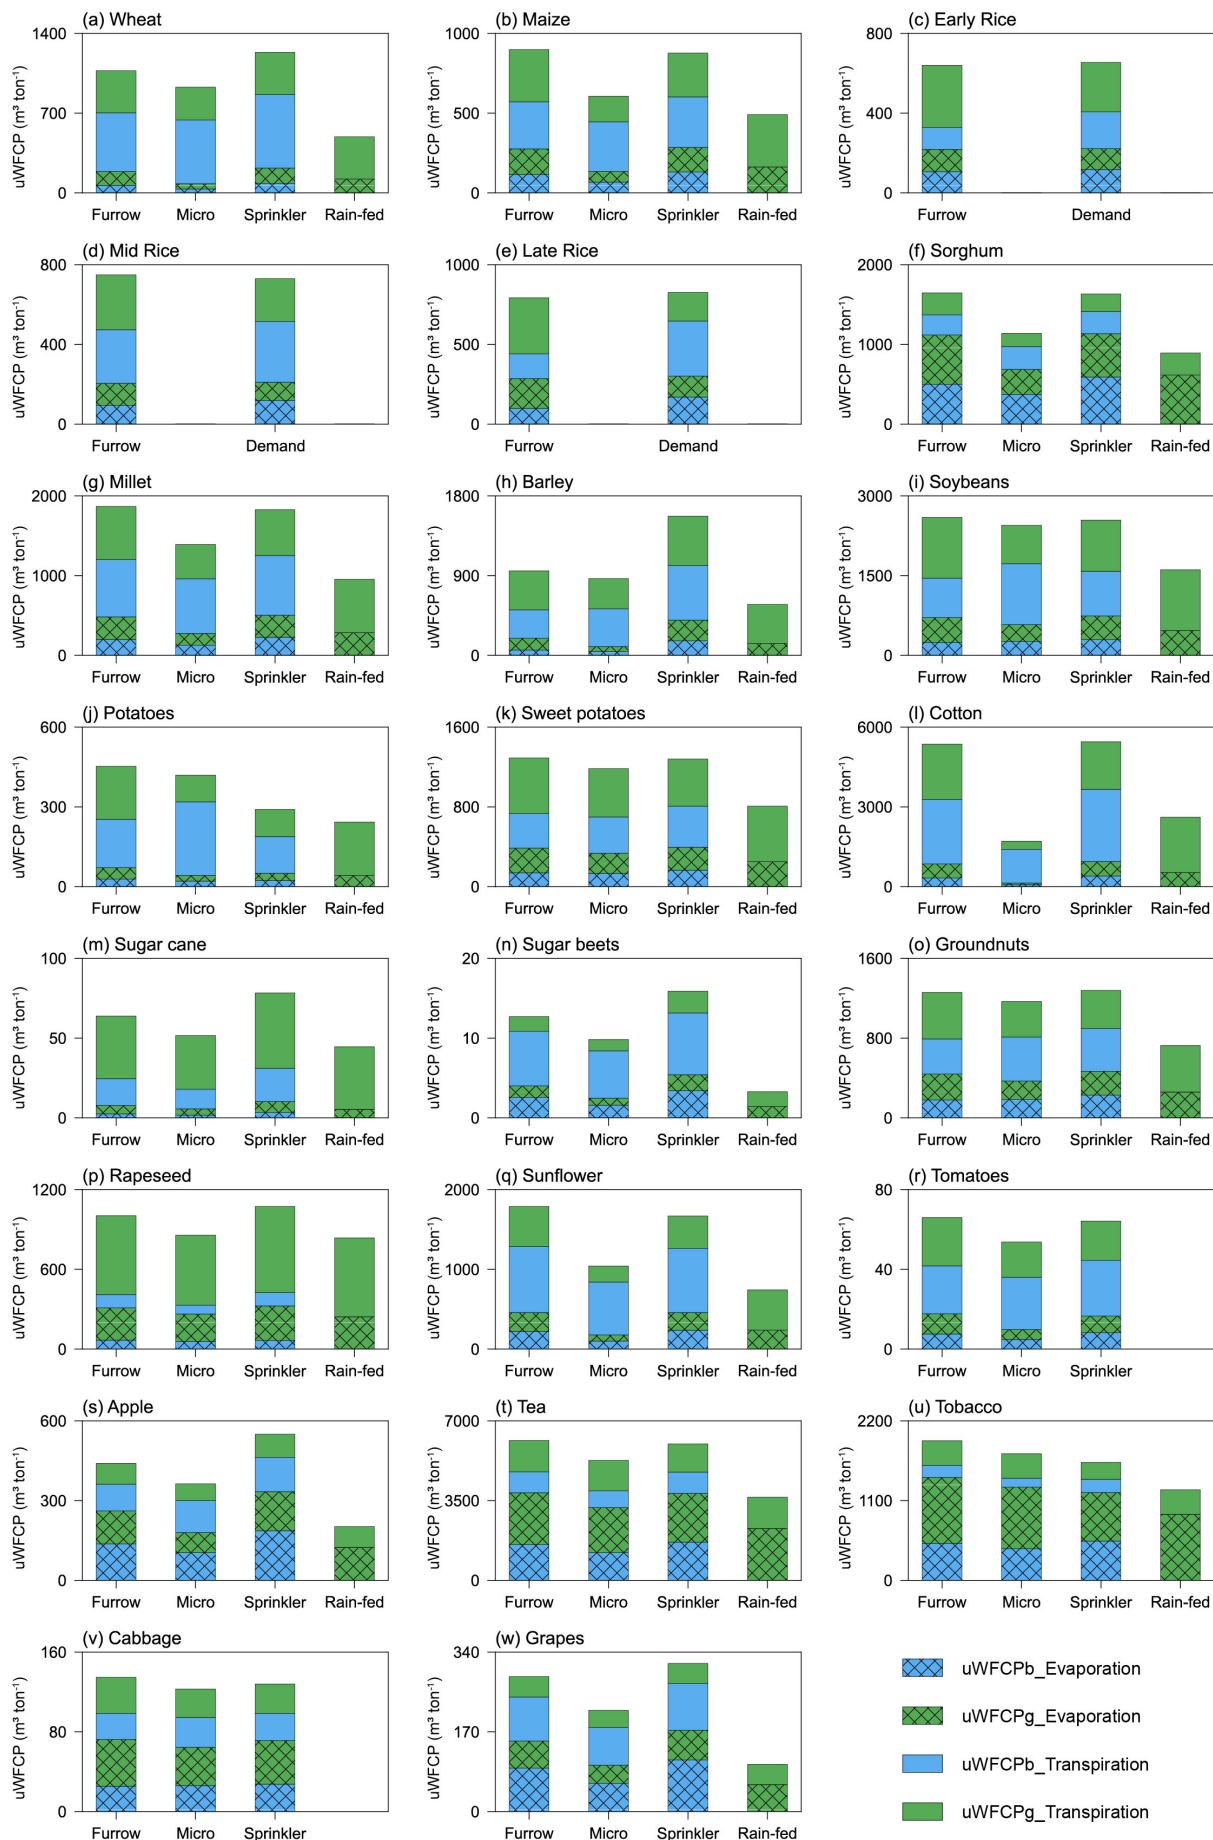

**Fig. S16** Proportion of blue and green water consumption for soil evaporation and crop transpiration under different water supply and irrigation practices.

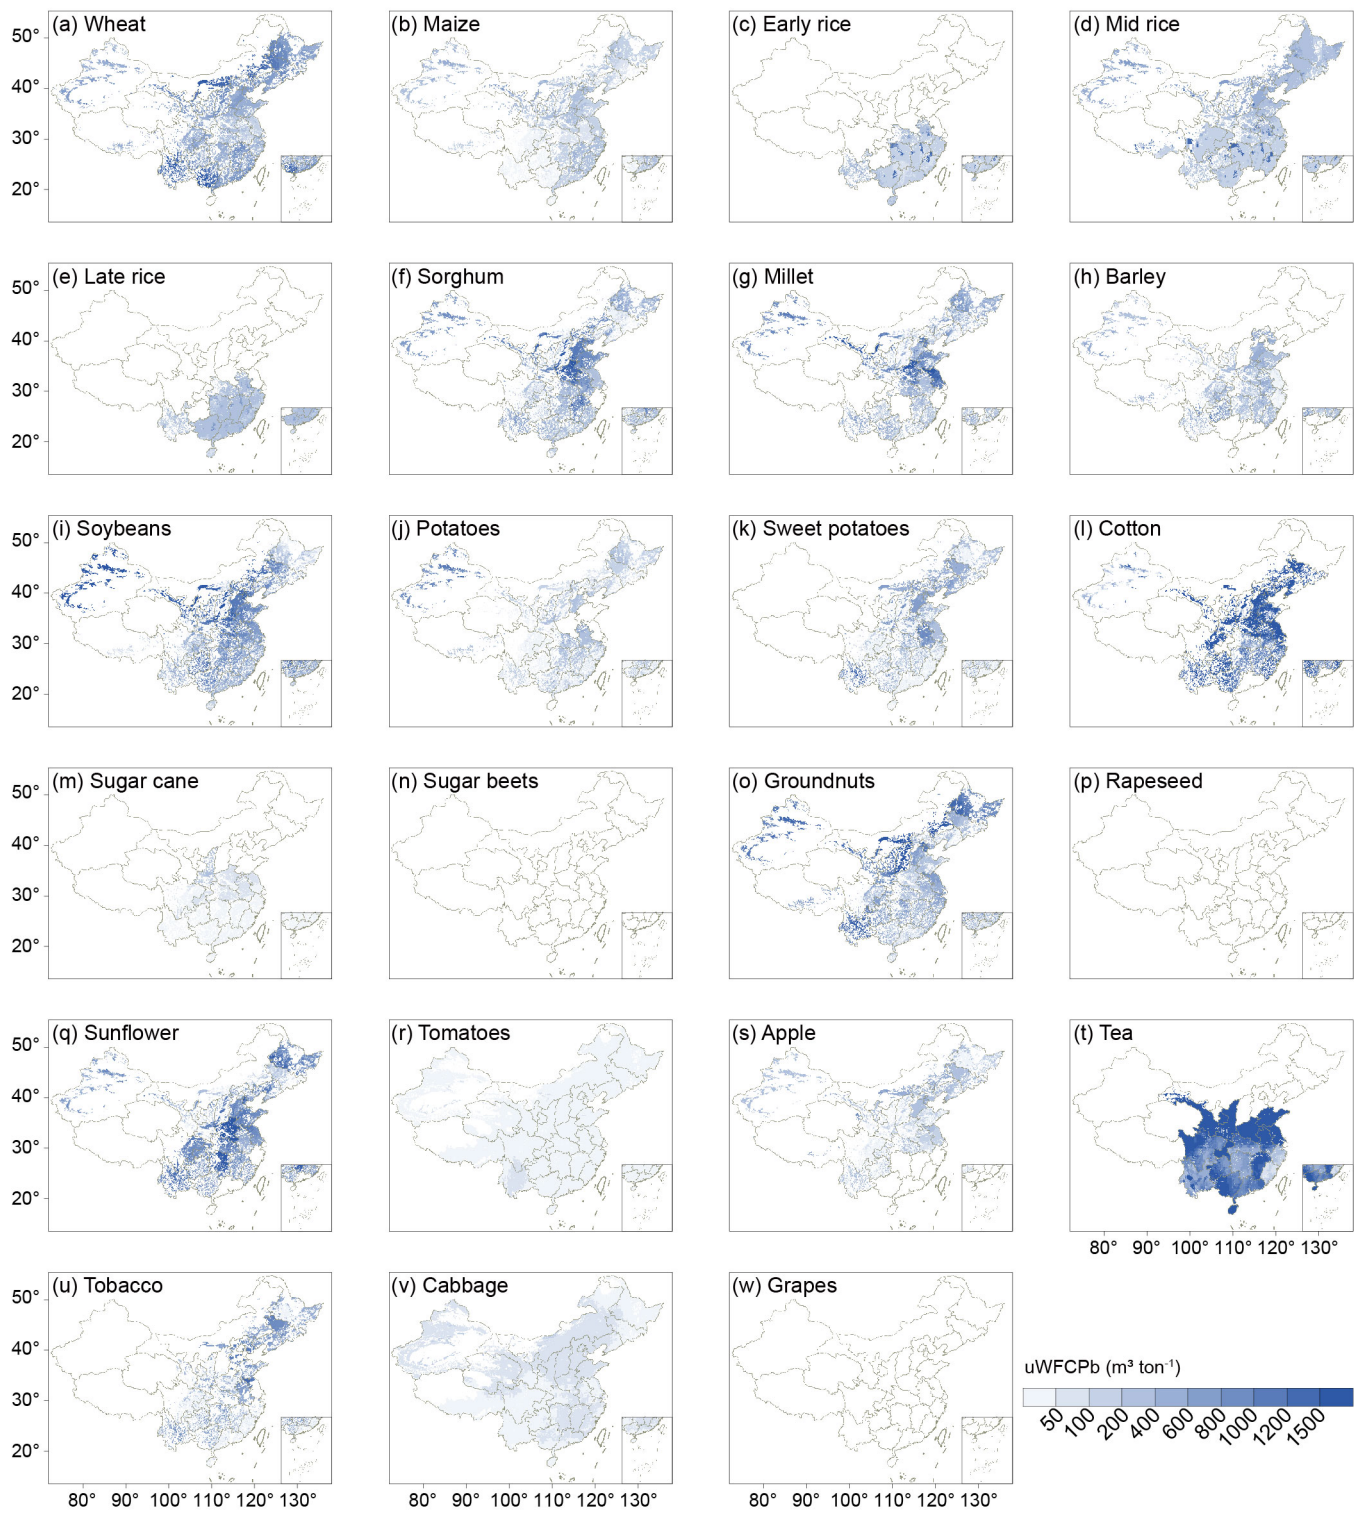

**Fig. S17 Gridded uWFCPb (Annual average for 2010-2018).**

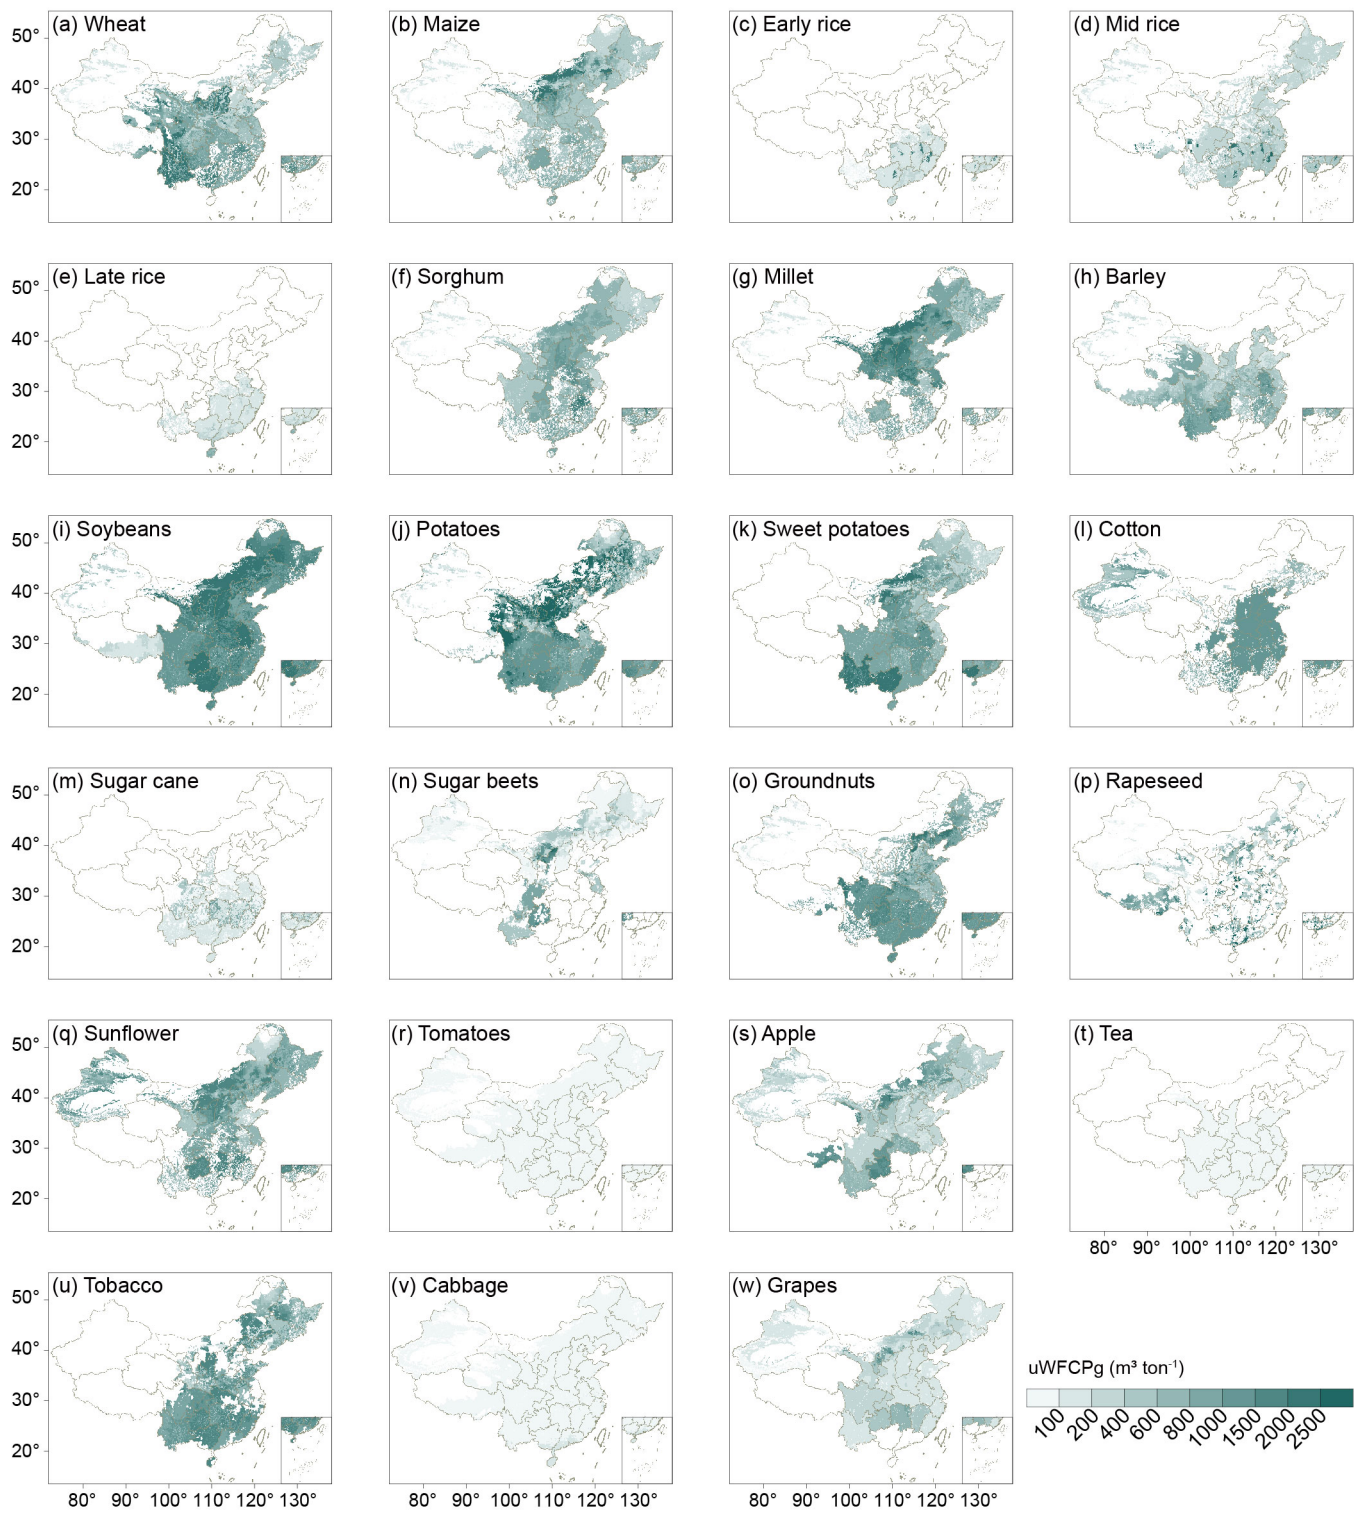

**Fig. S18 Gridded uWFCPg (Annual average for 2010-2018).**



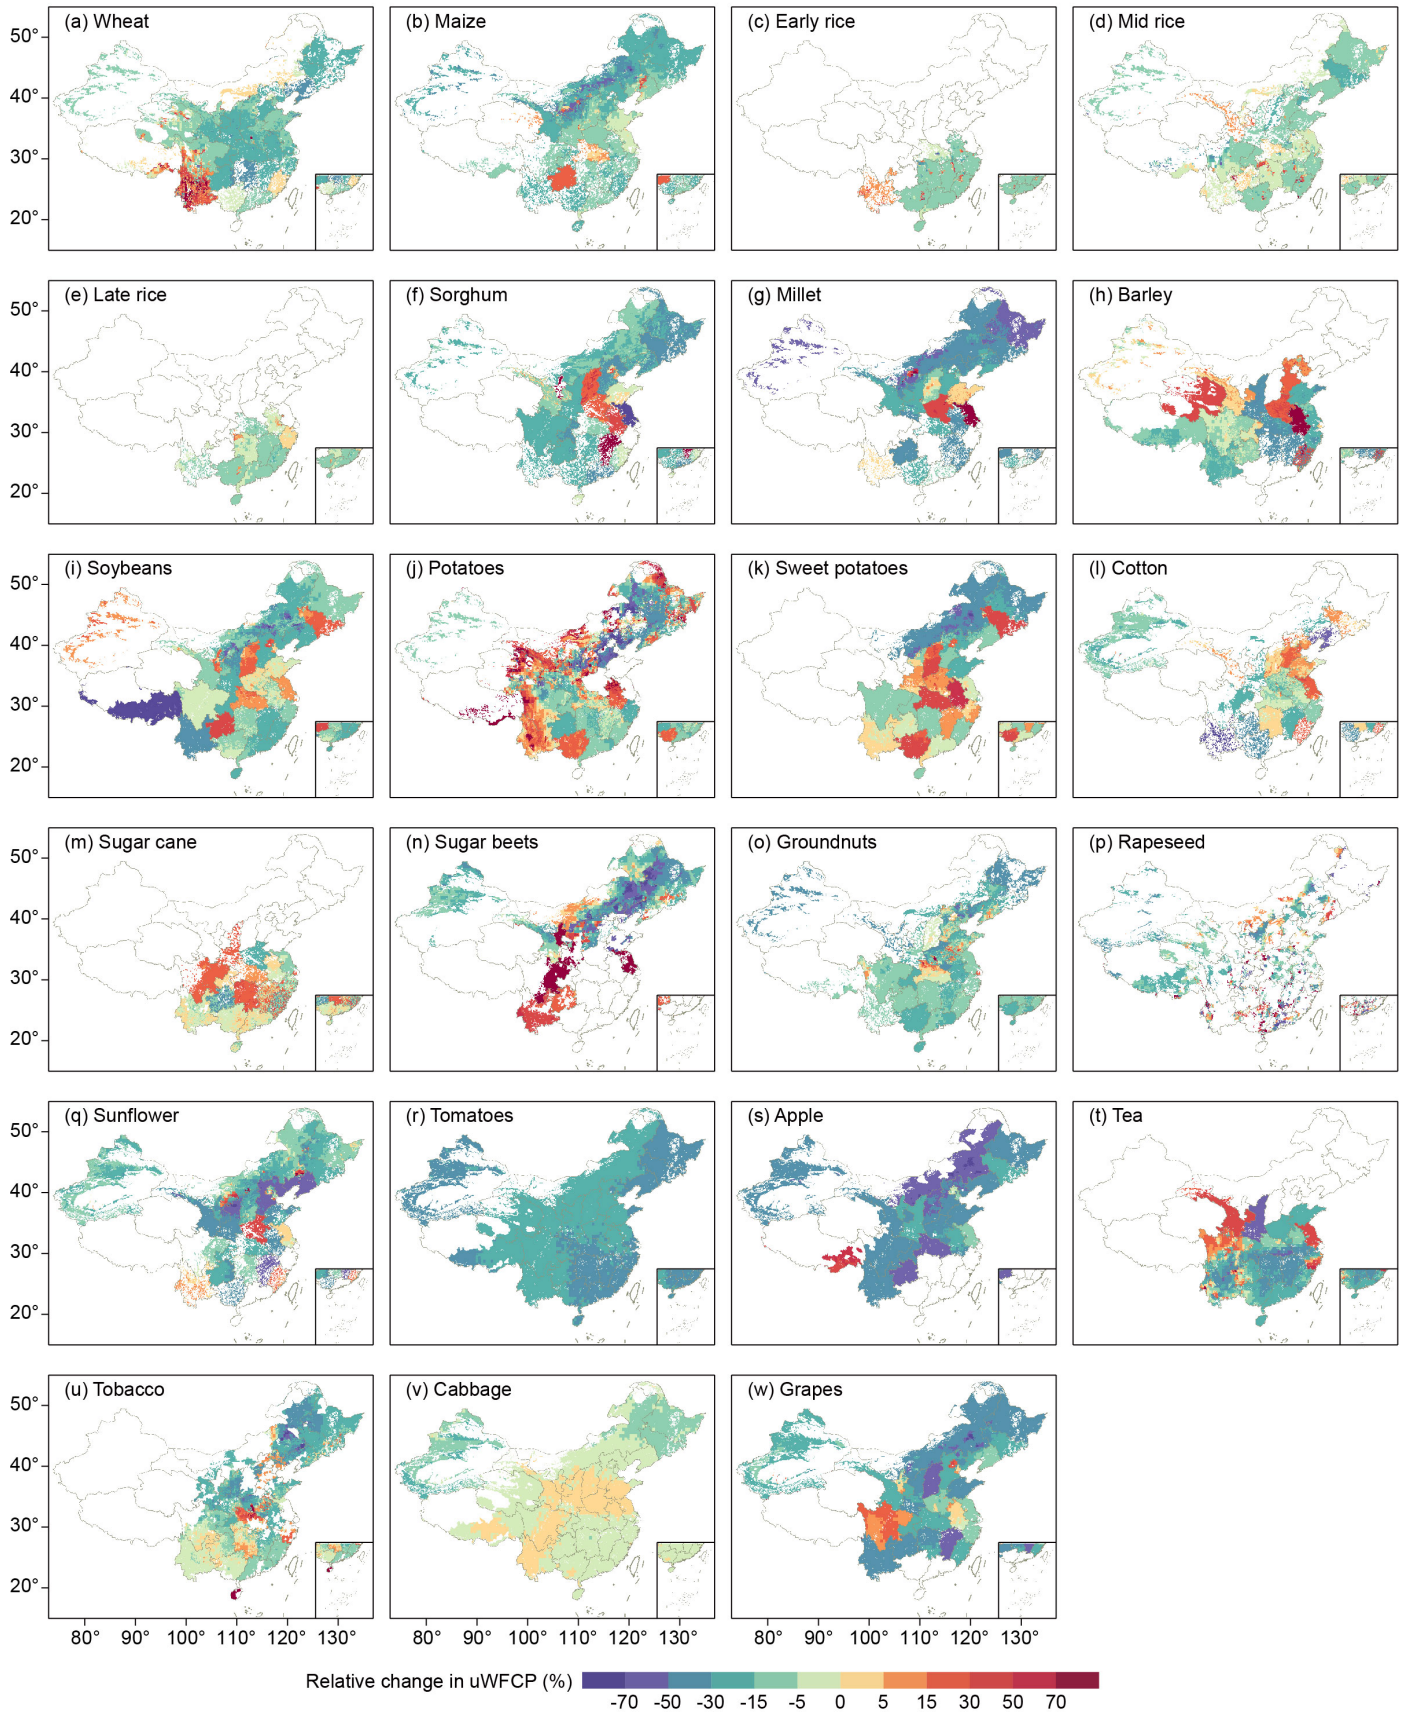

Fig. S19 Relative changes of the average gridded uWFCP for 2000-2009 to that for 2010-2018.

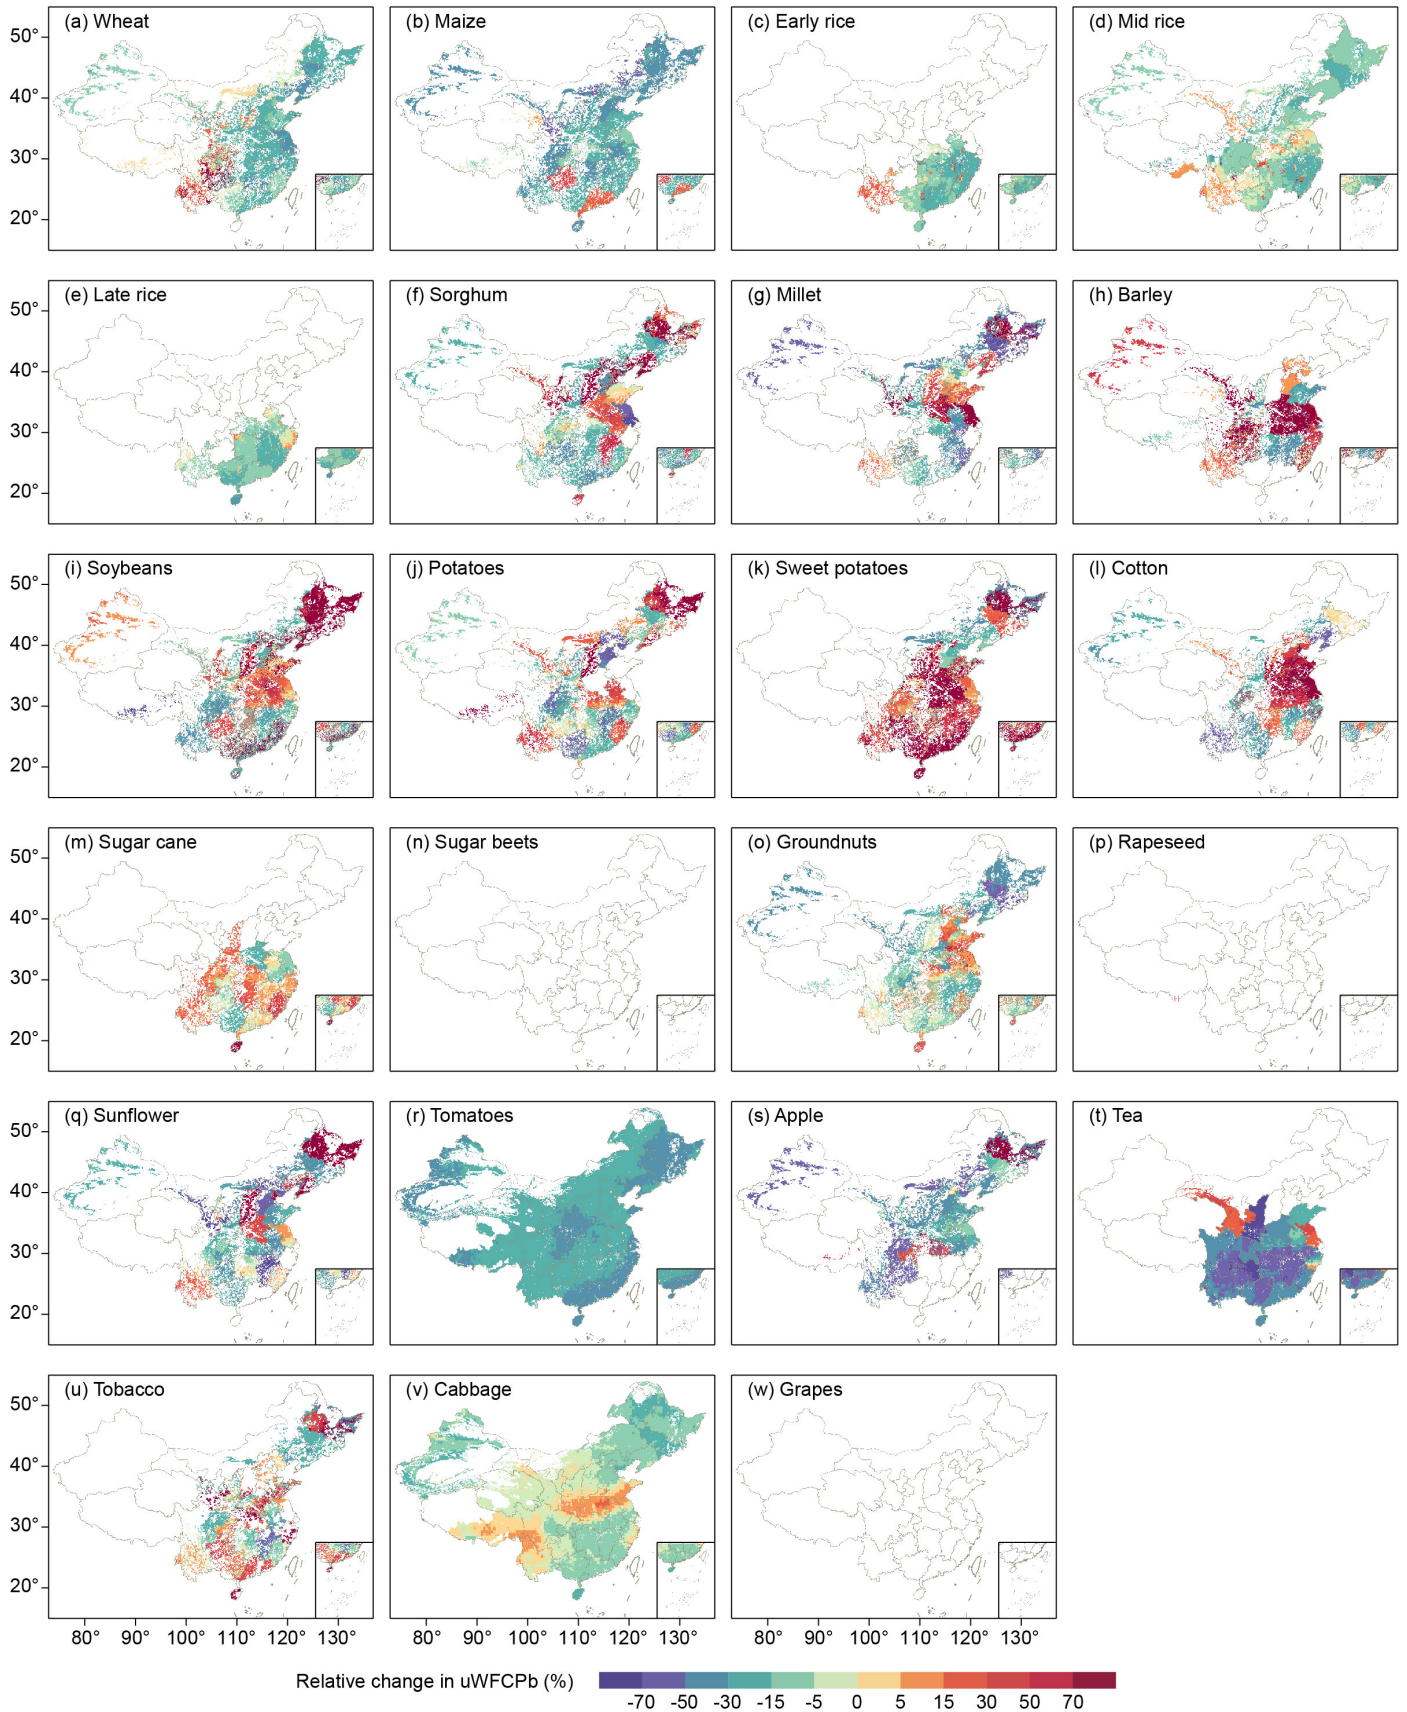

**Fig. S20** Relative changes of the average gridded uWFCPb for 2000-2009 to that for 2010-2018.



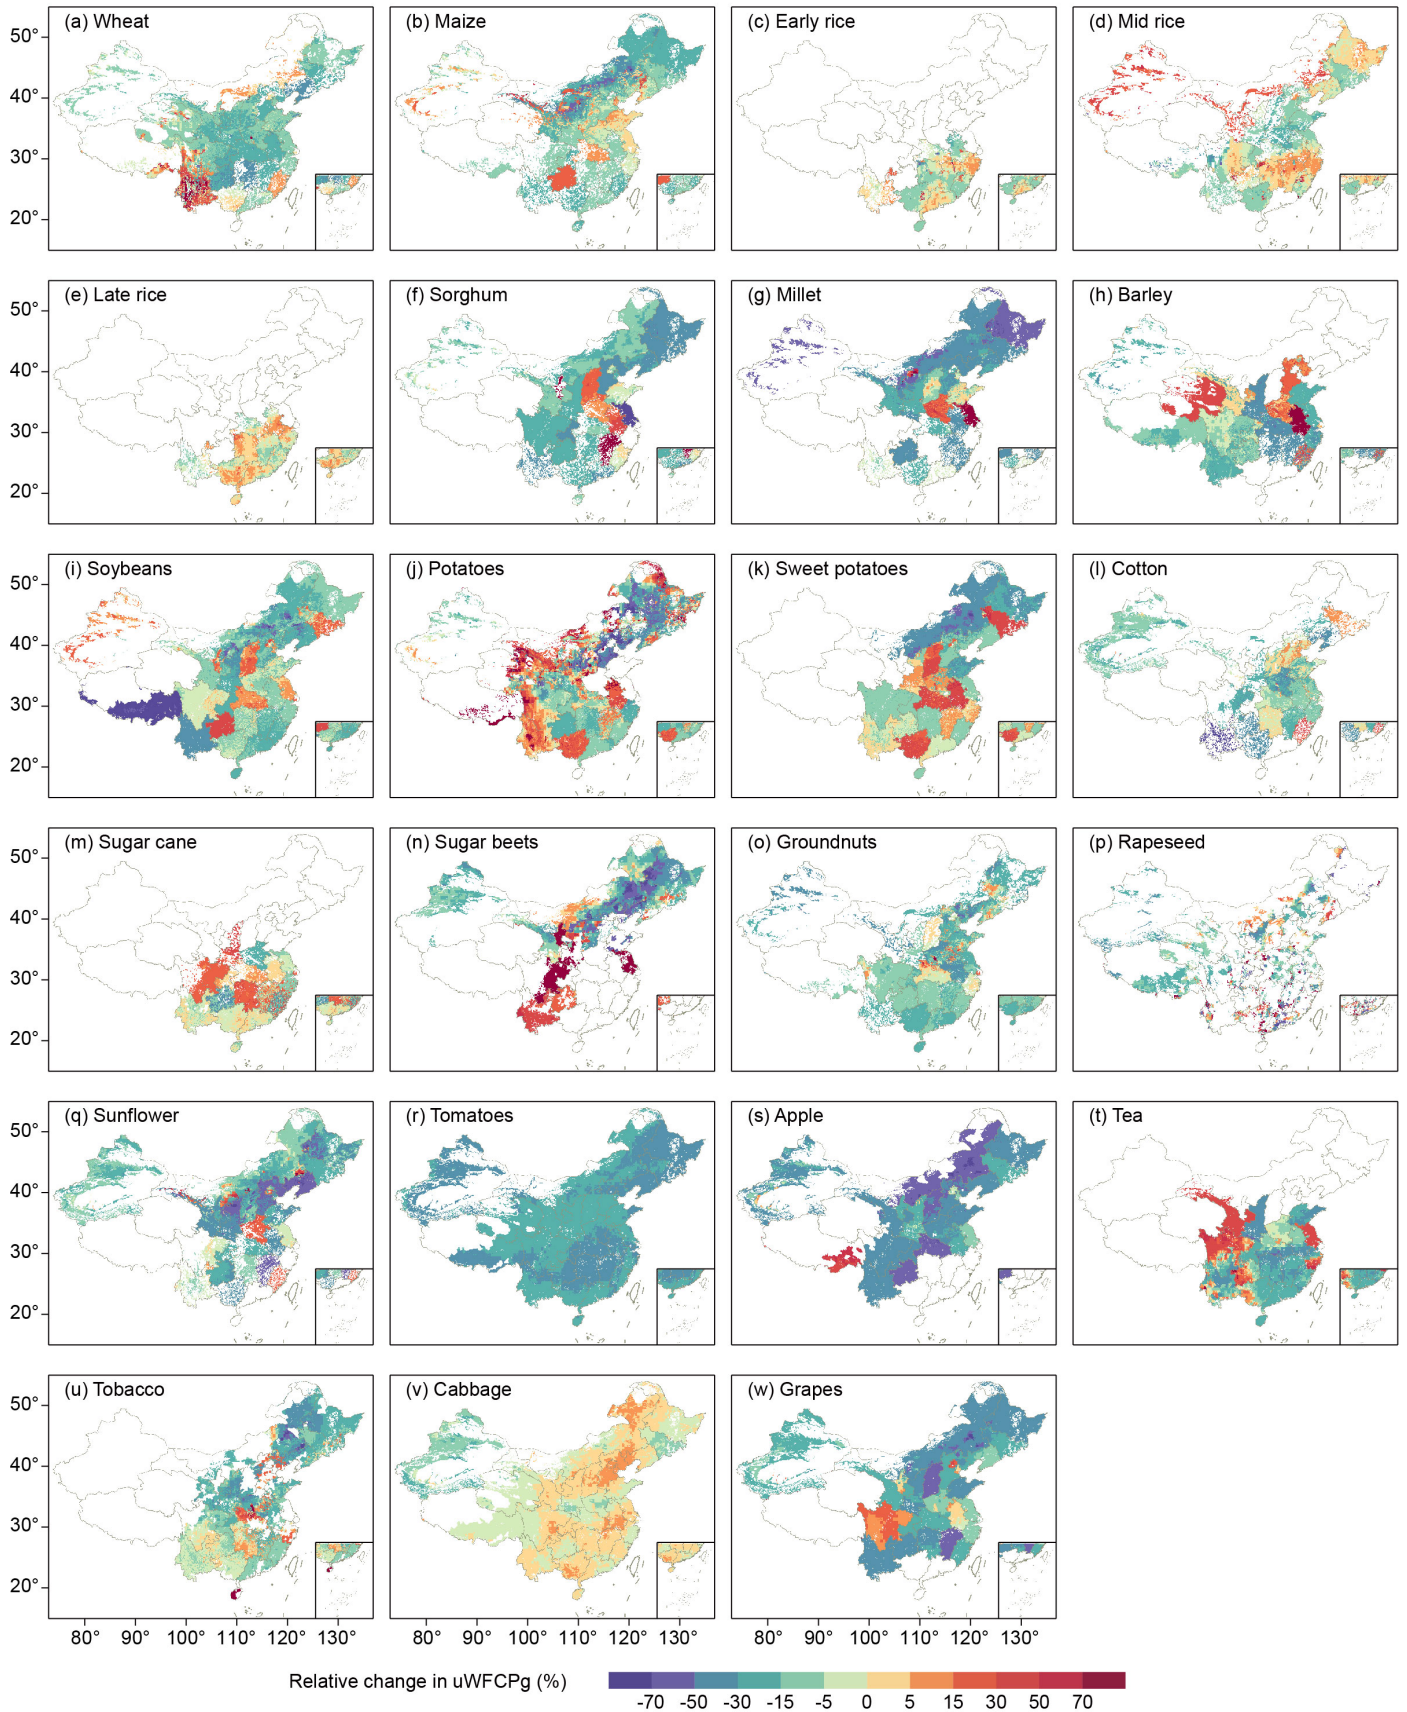

Fig. S21 Relative changes of the average gridded uWFCPg for 2000-2009 to that for 2010-2018.

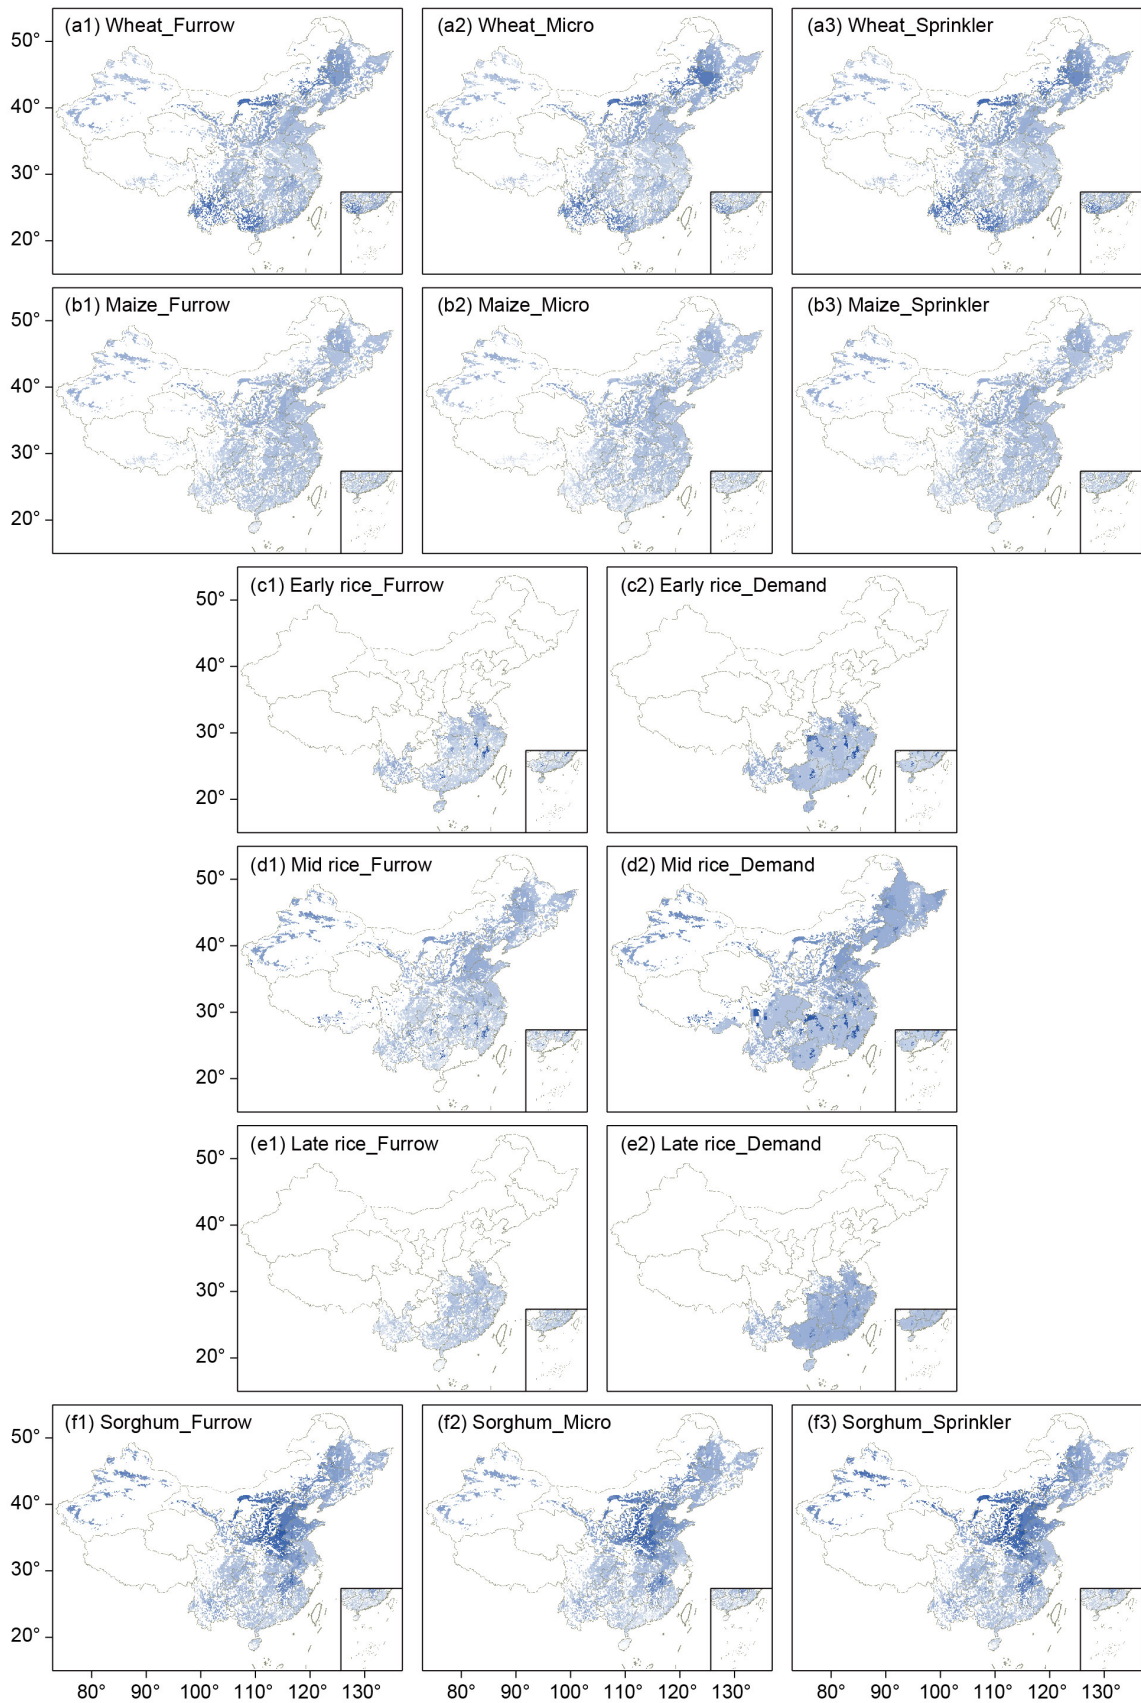



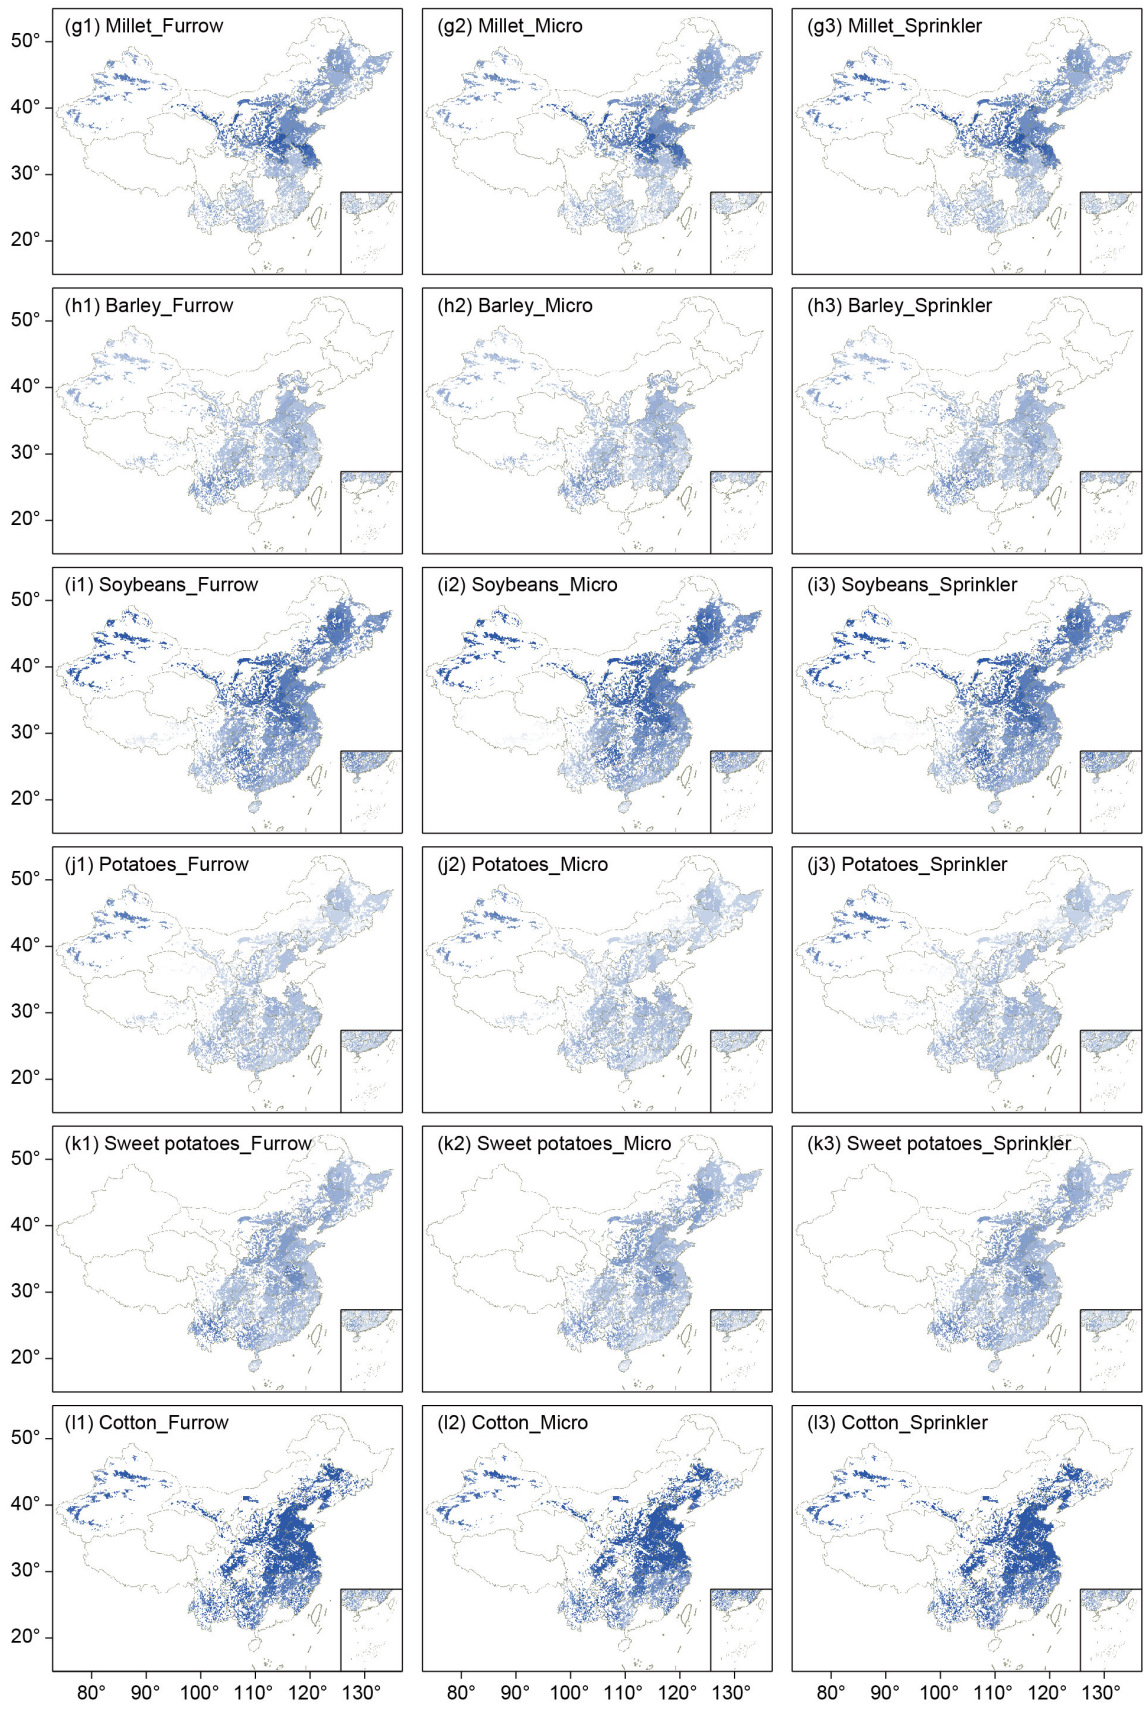

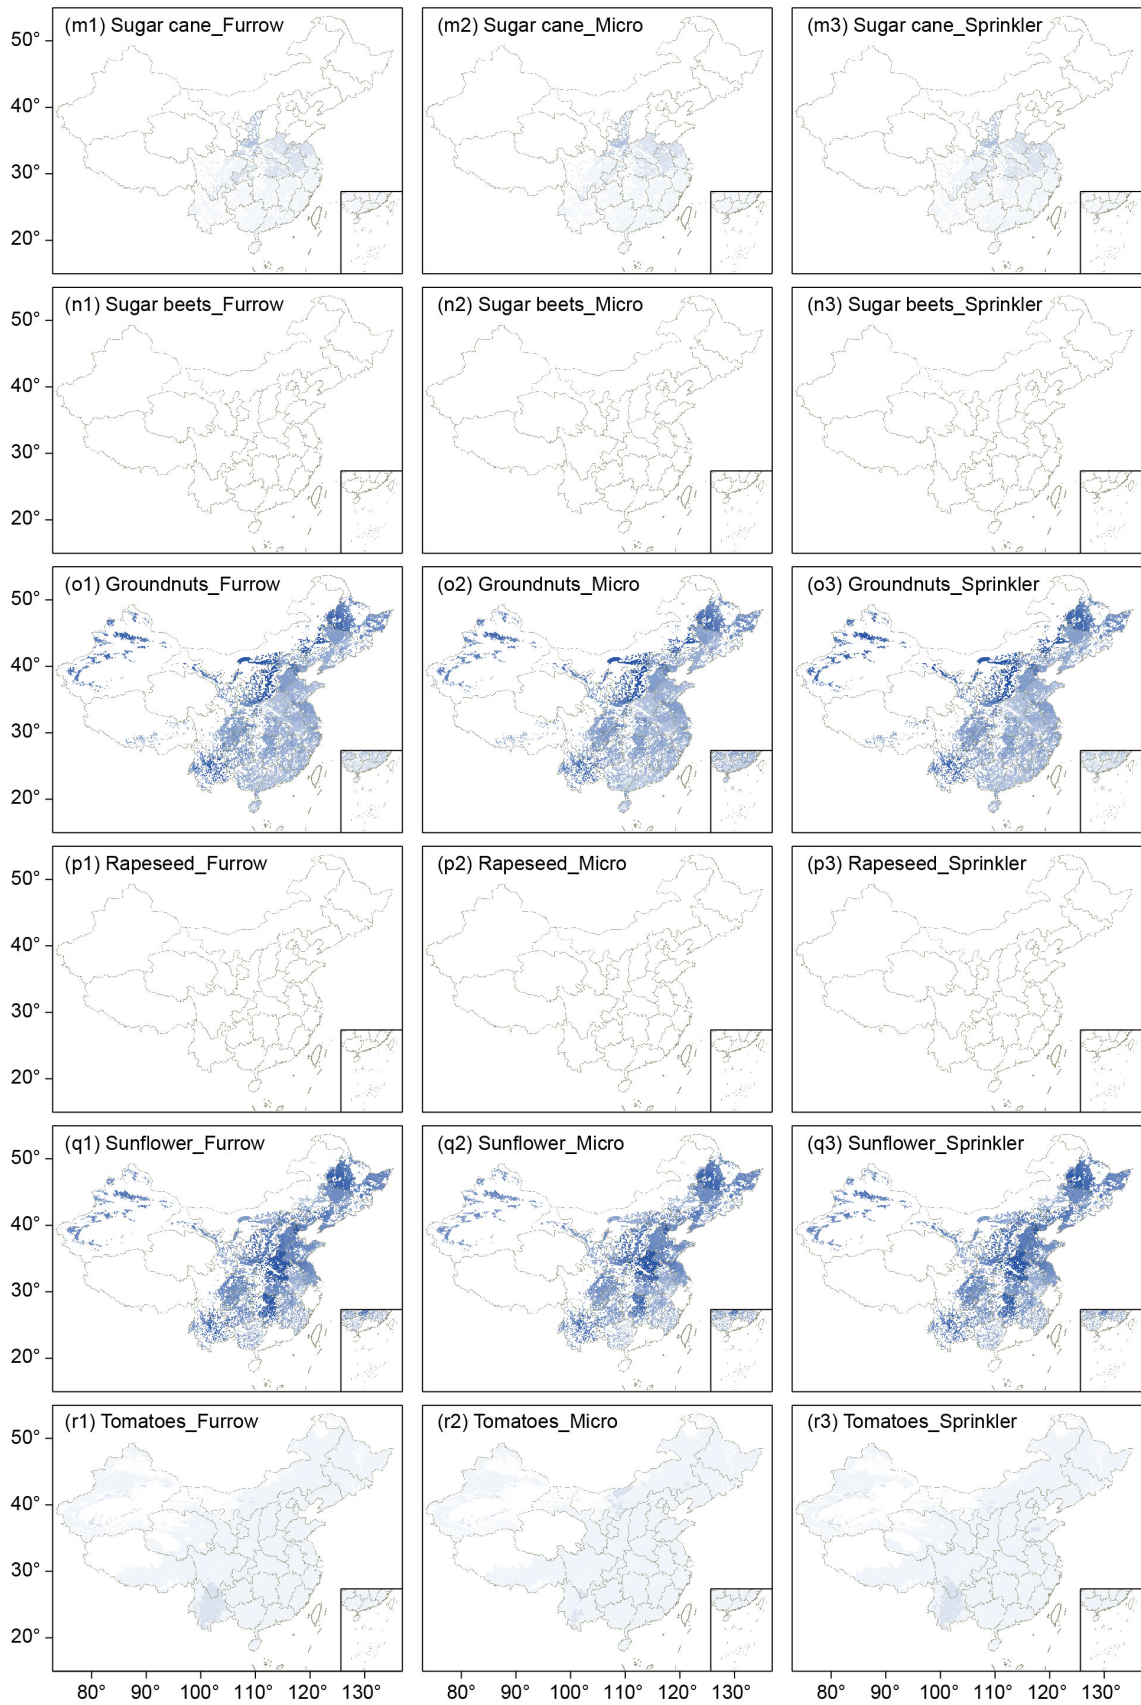



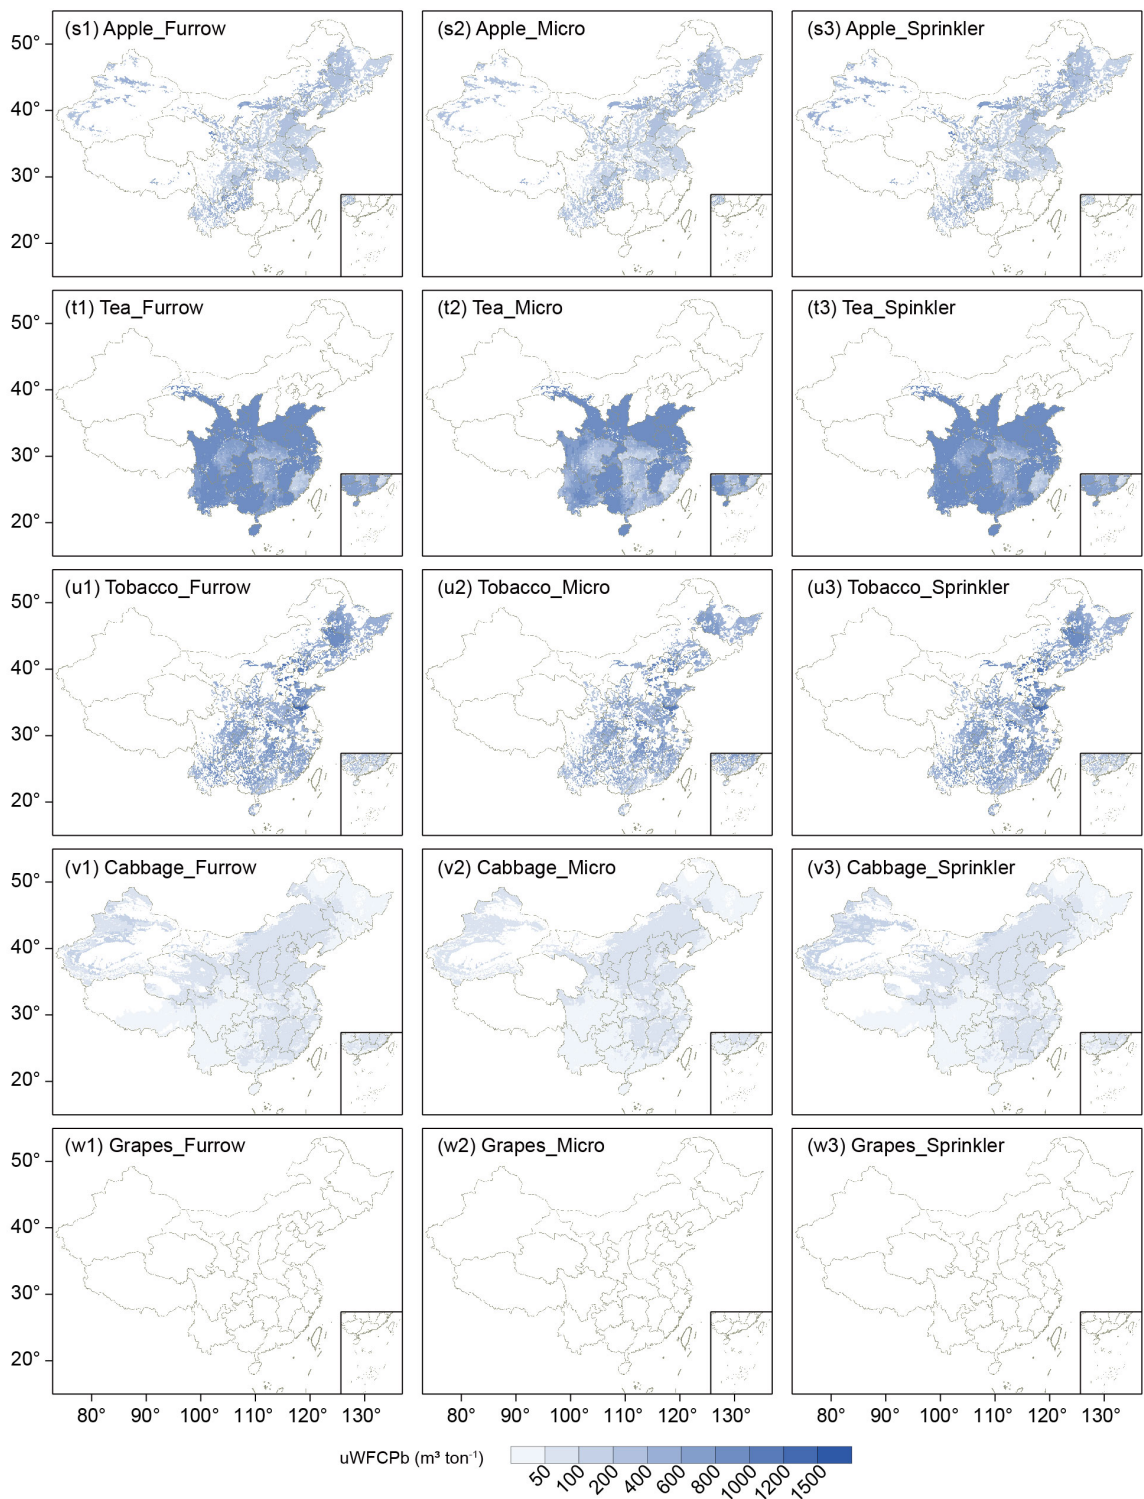

Fig. S22 Gridded uWFCPb (Annual average for 2010-2018).

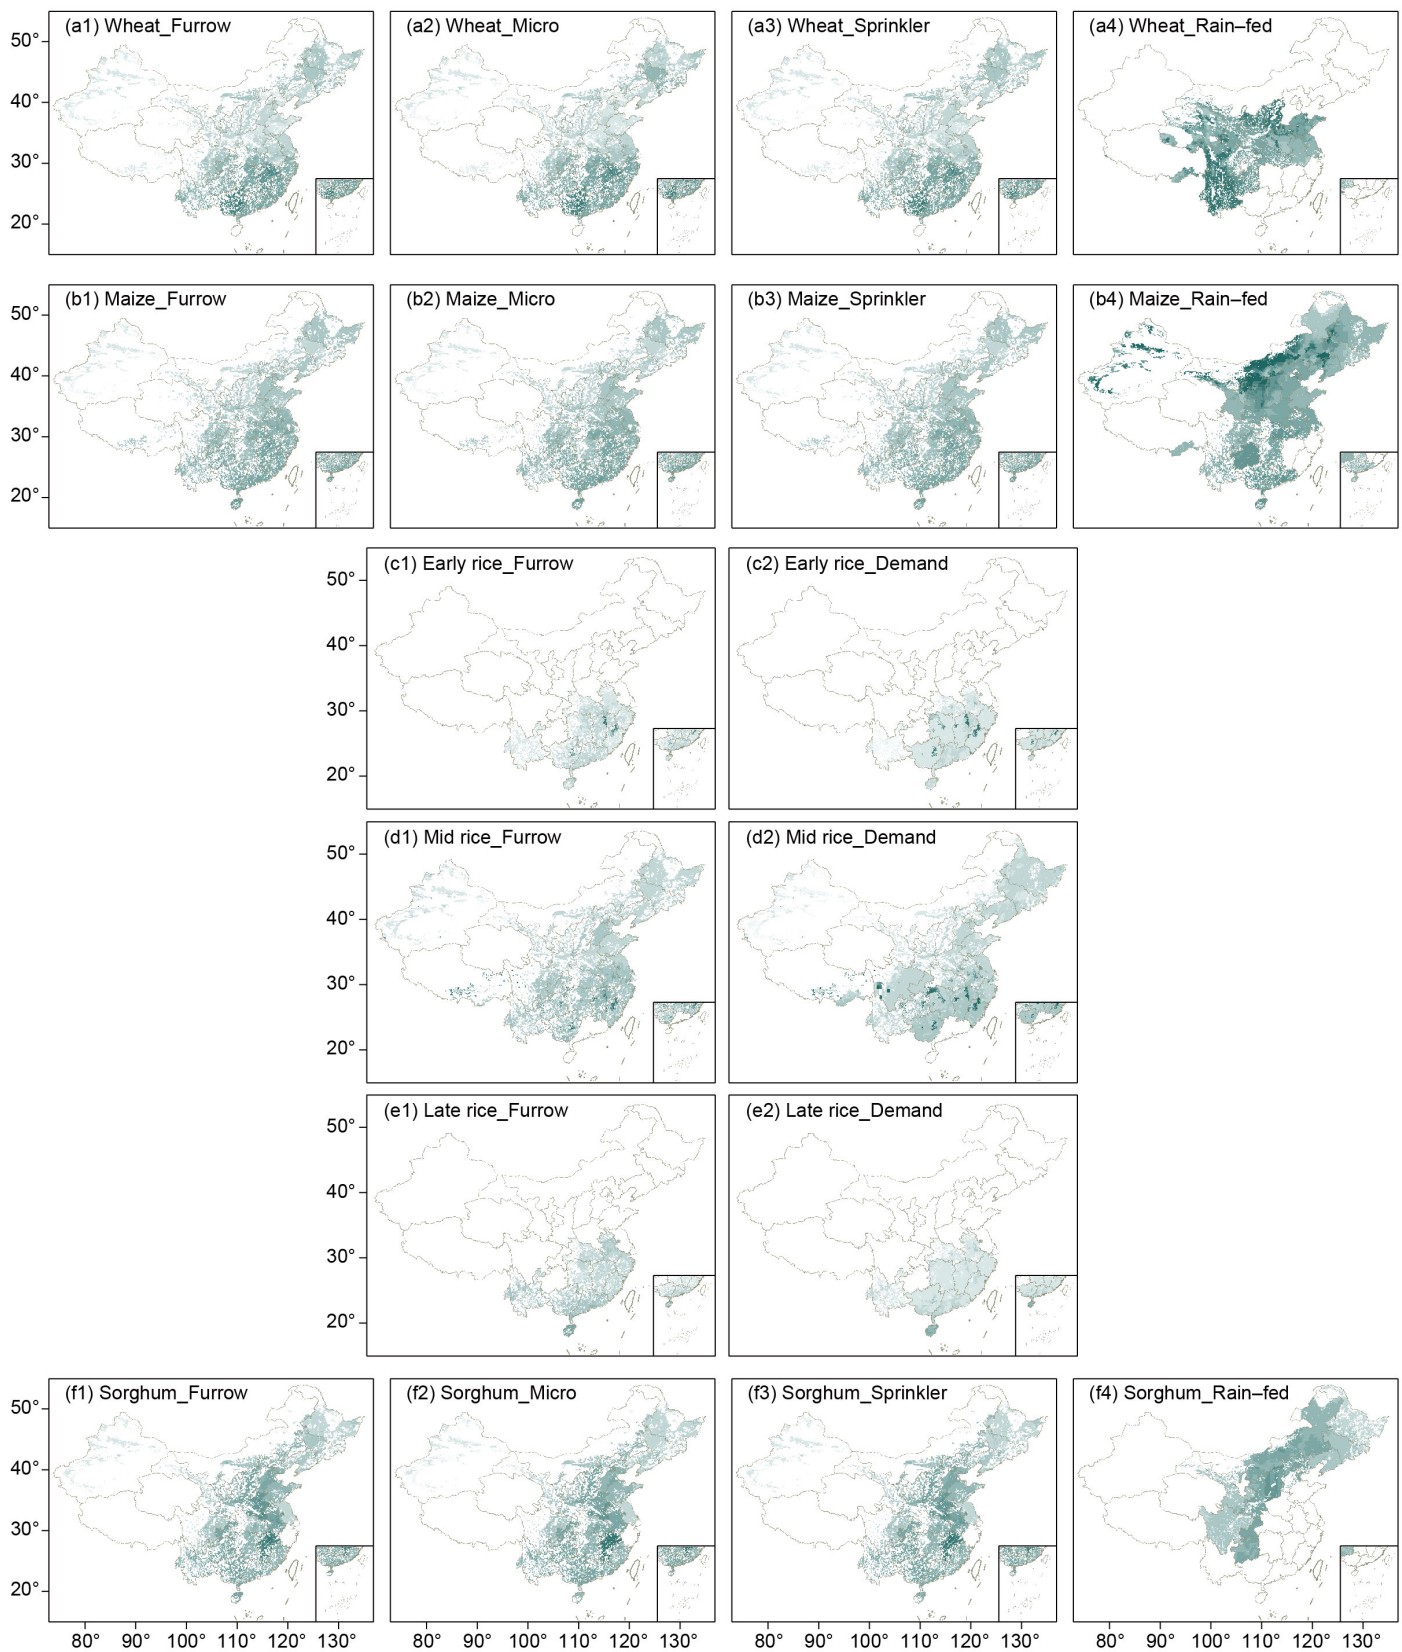



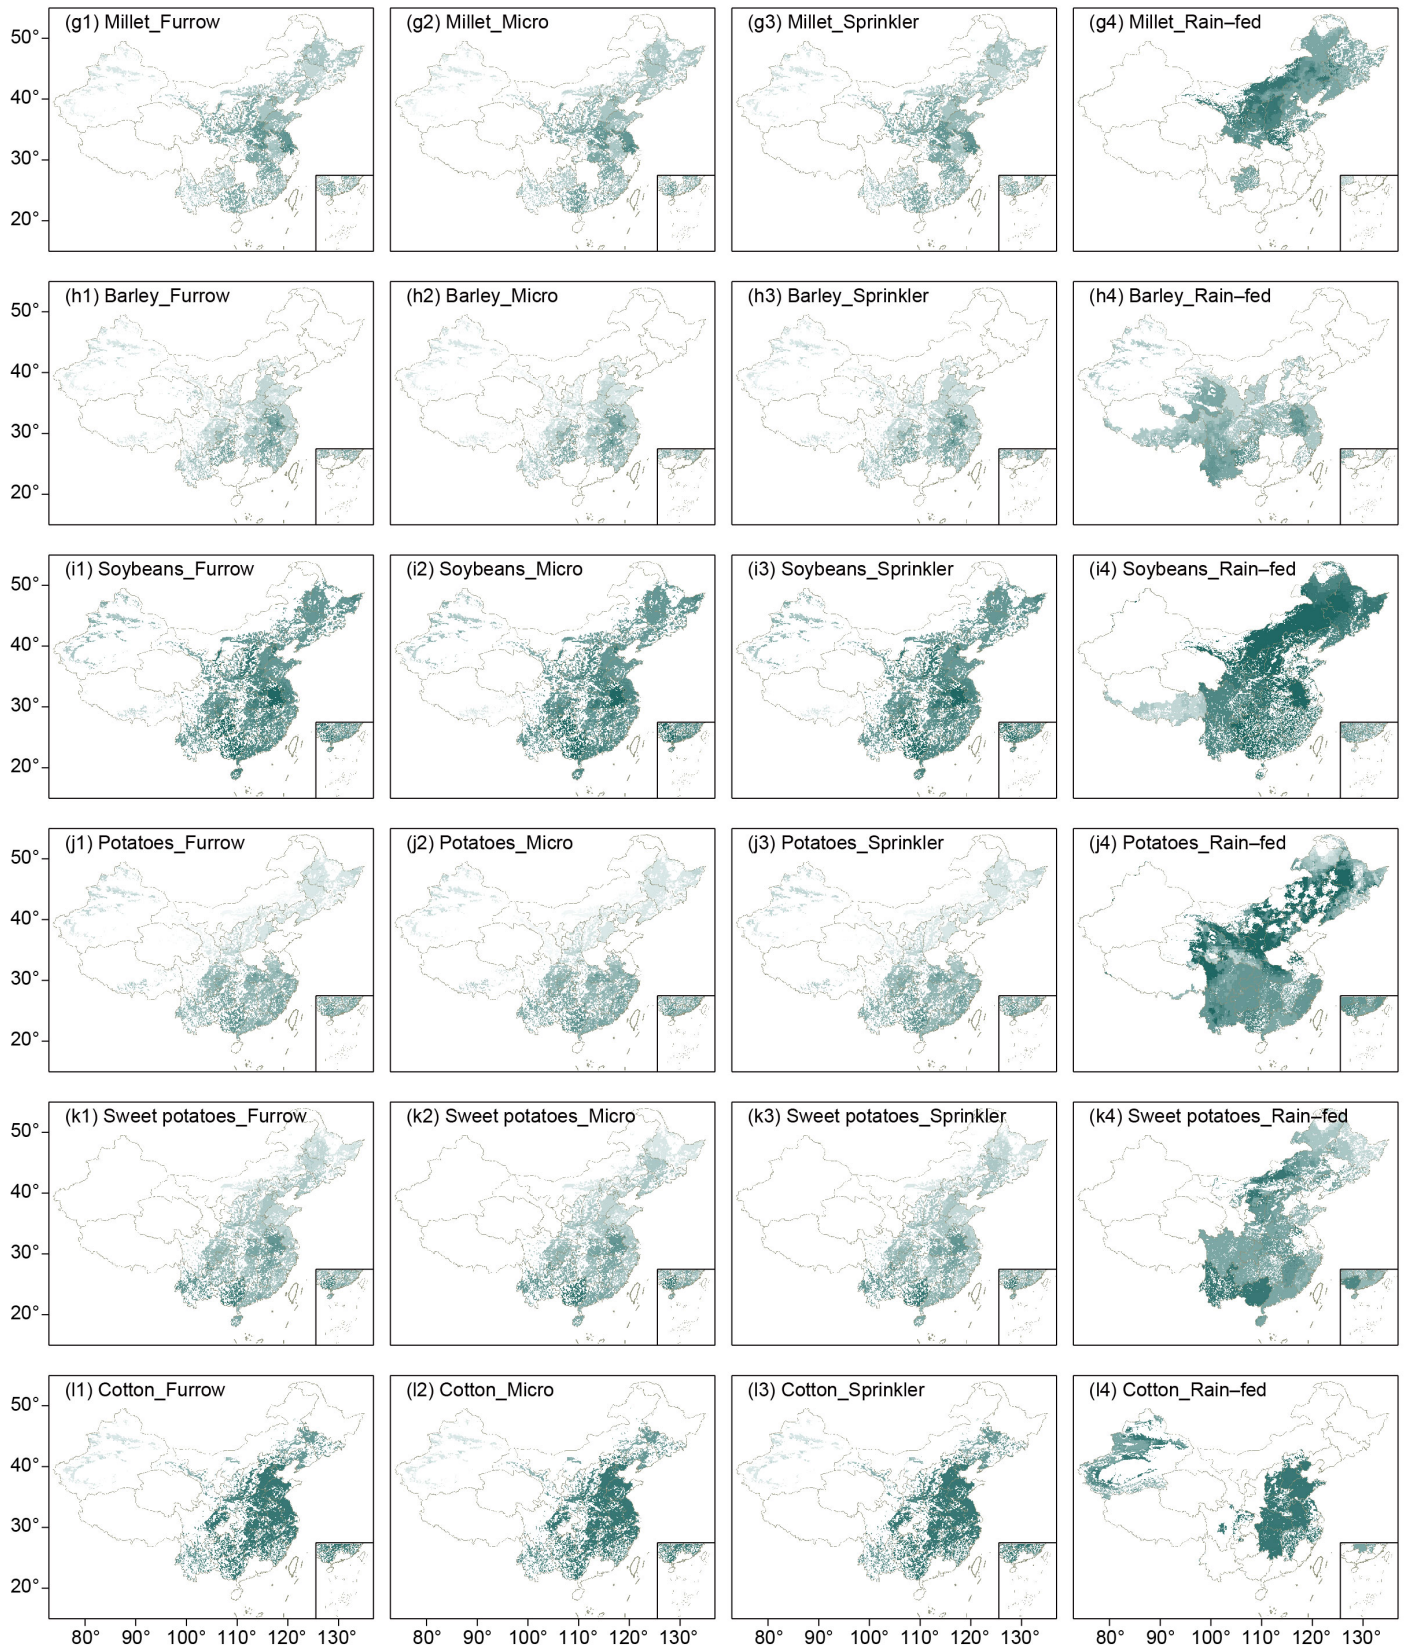

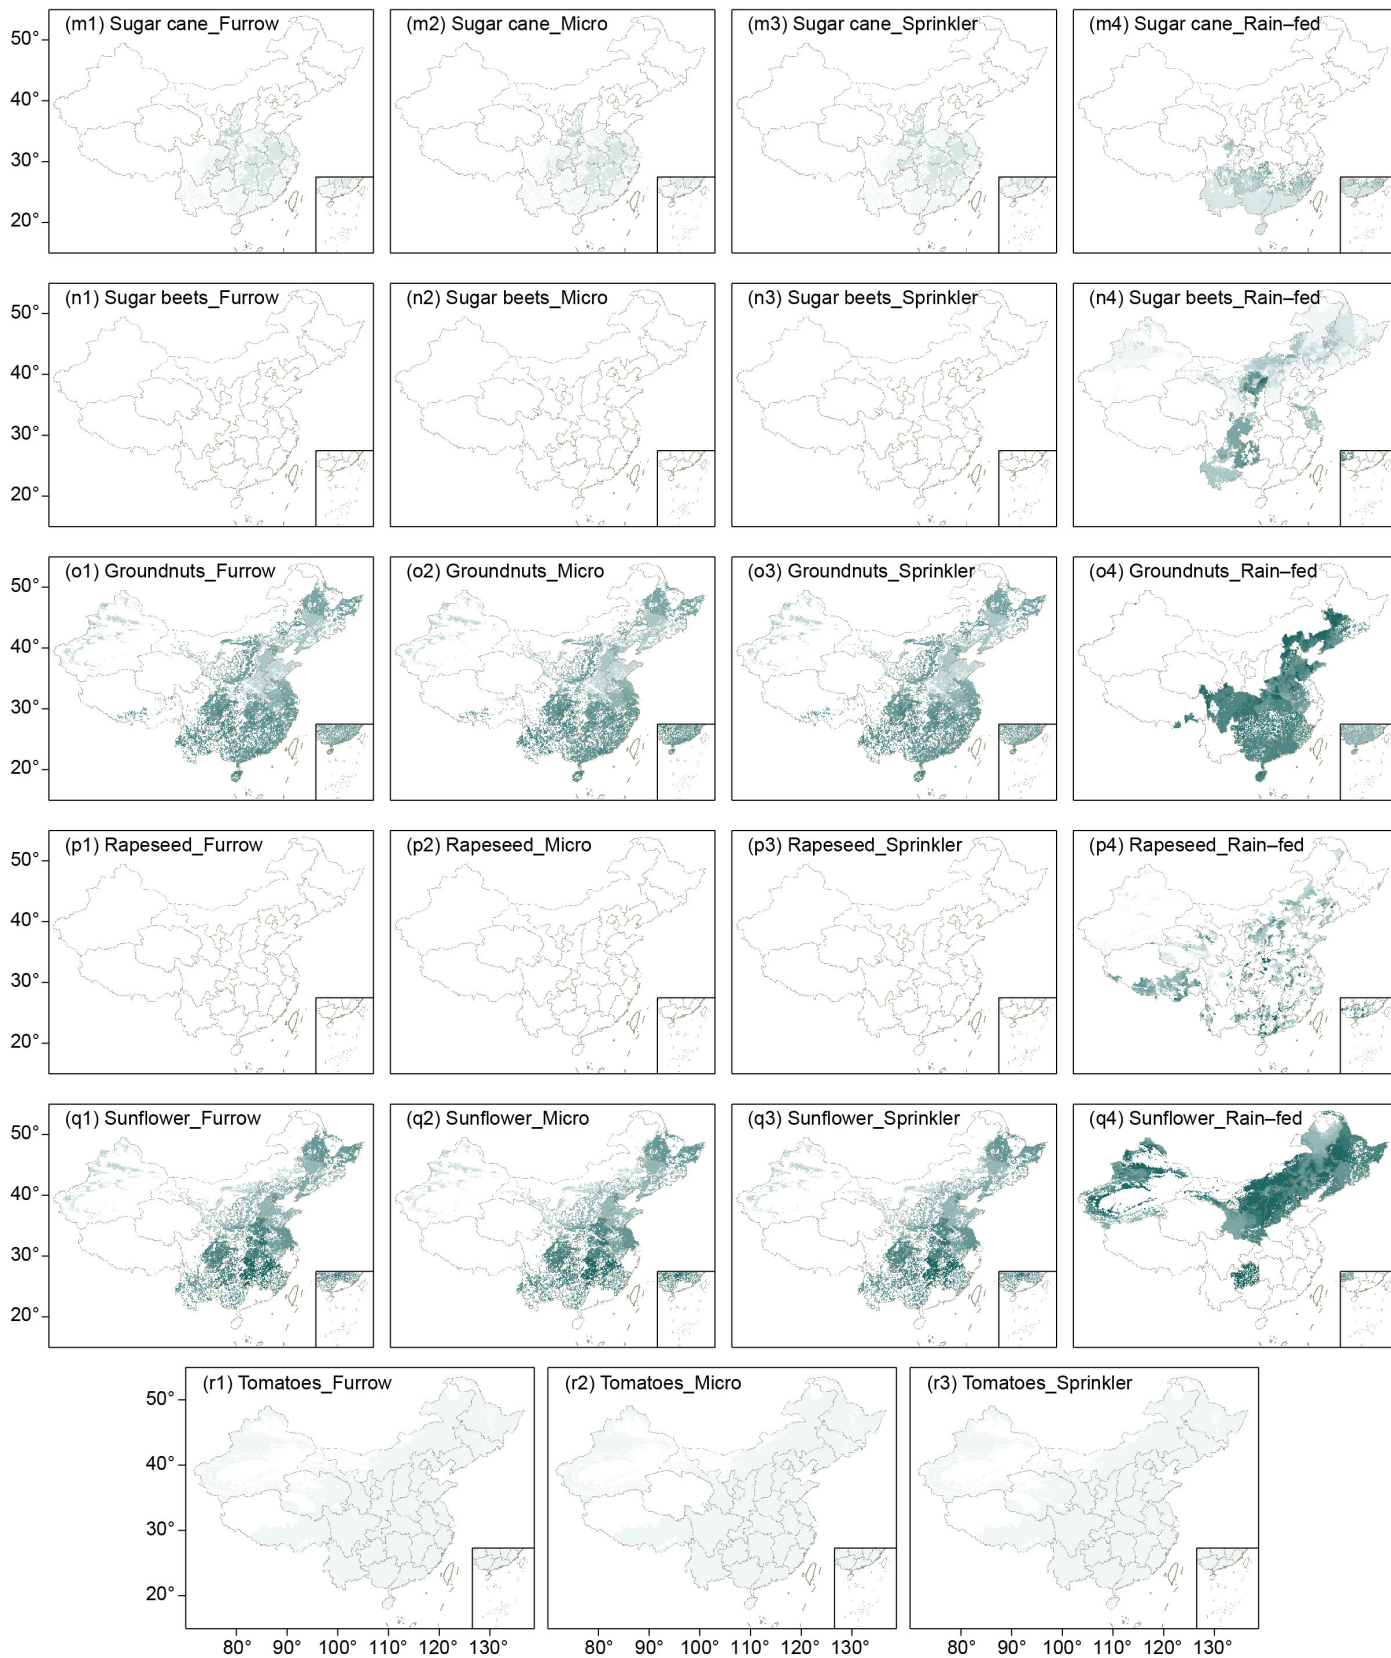



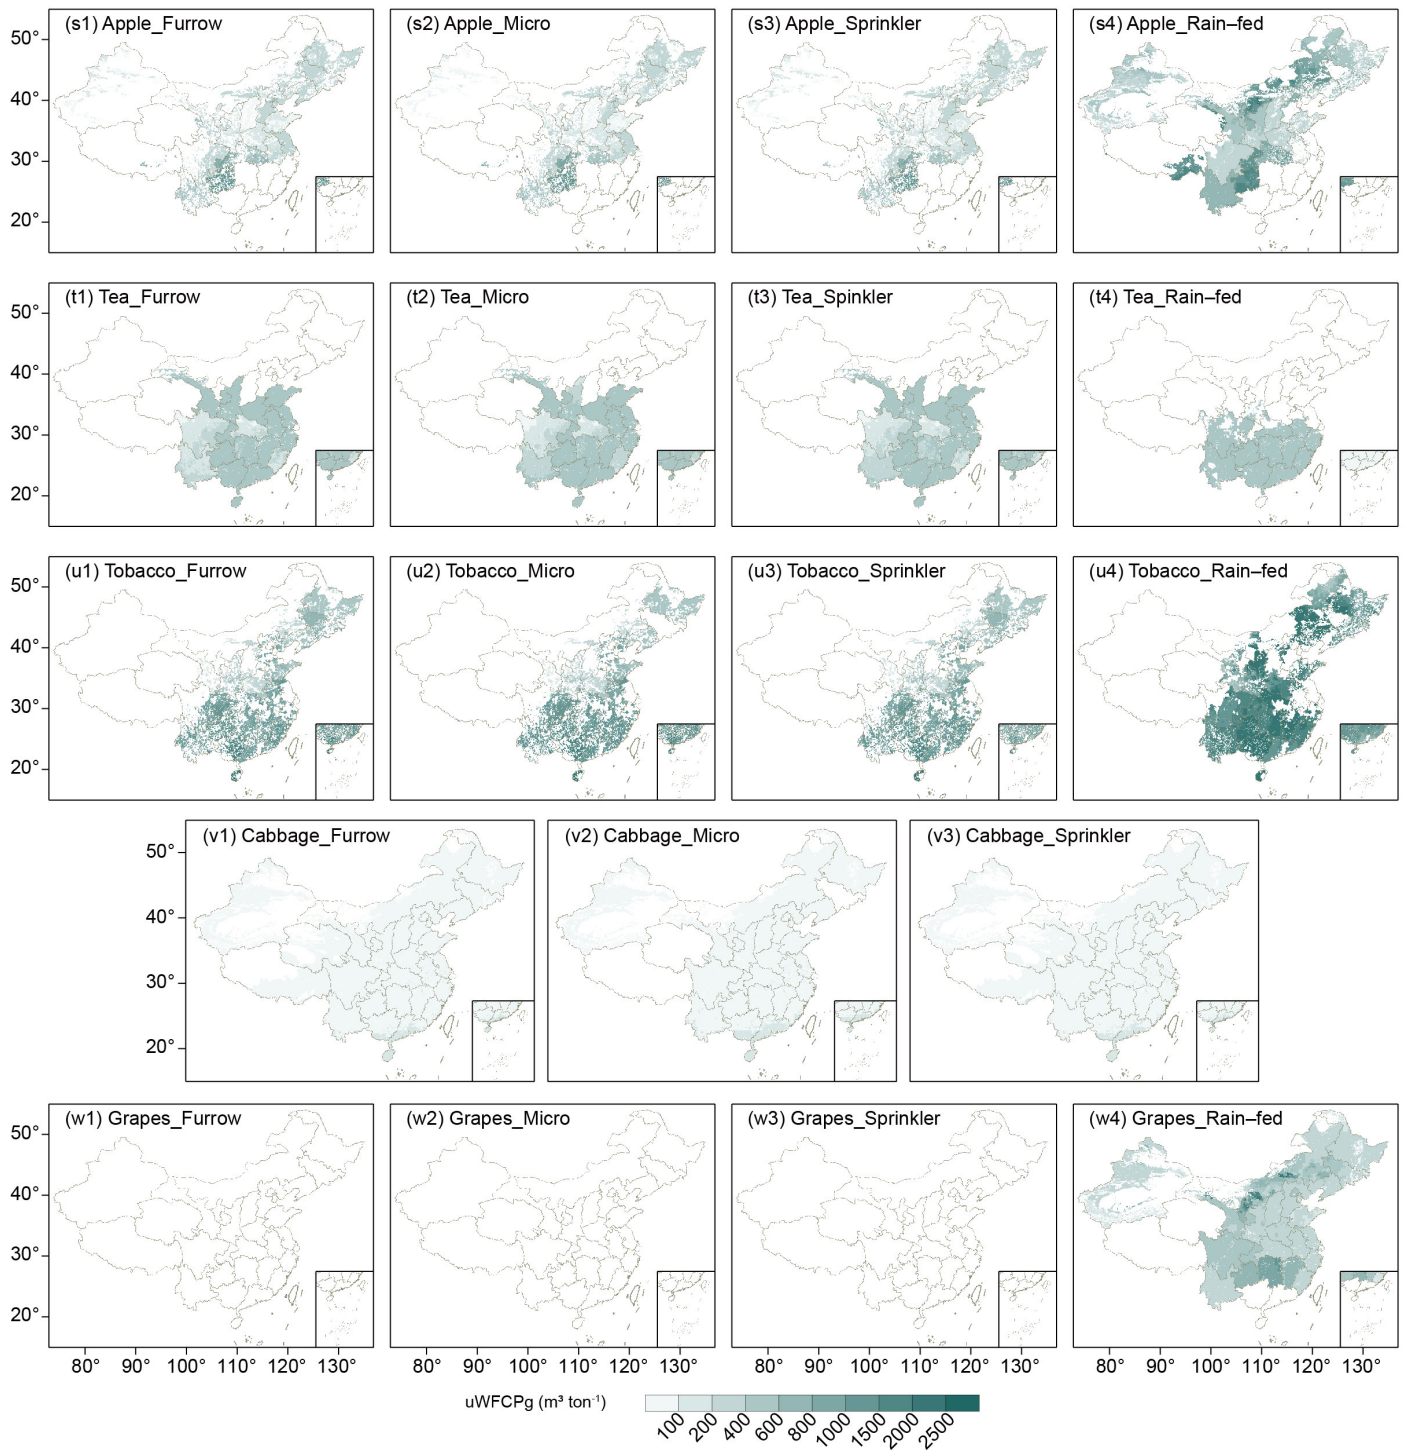

Fig. S23 Gridded uWFCPg (Annual average for 2010-2018).

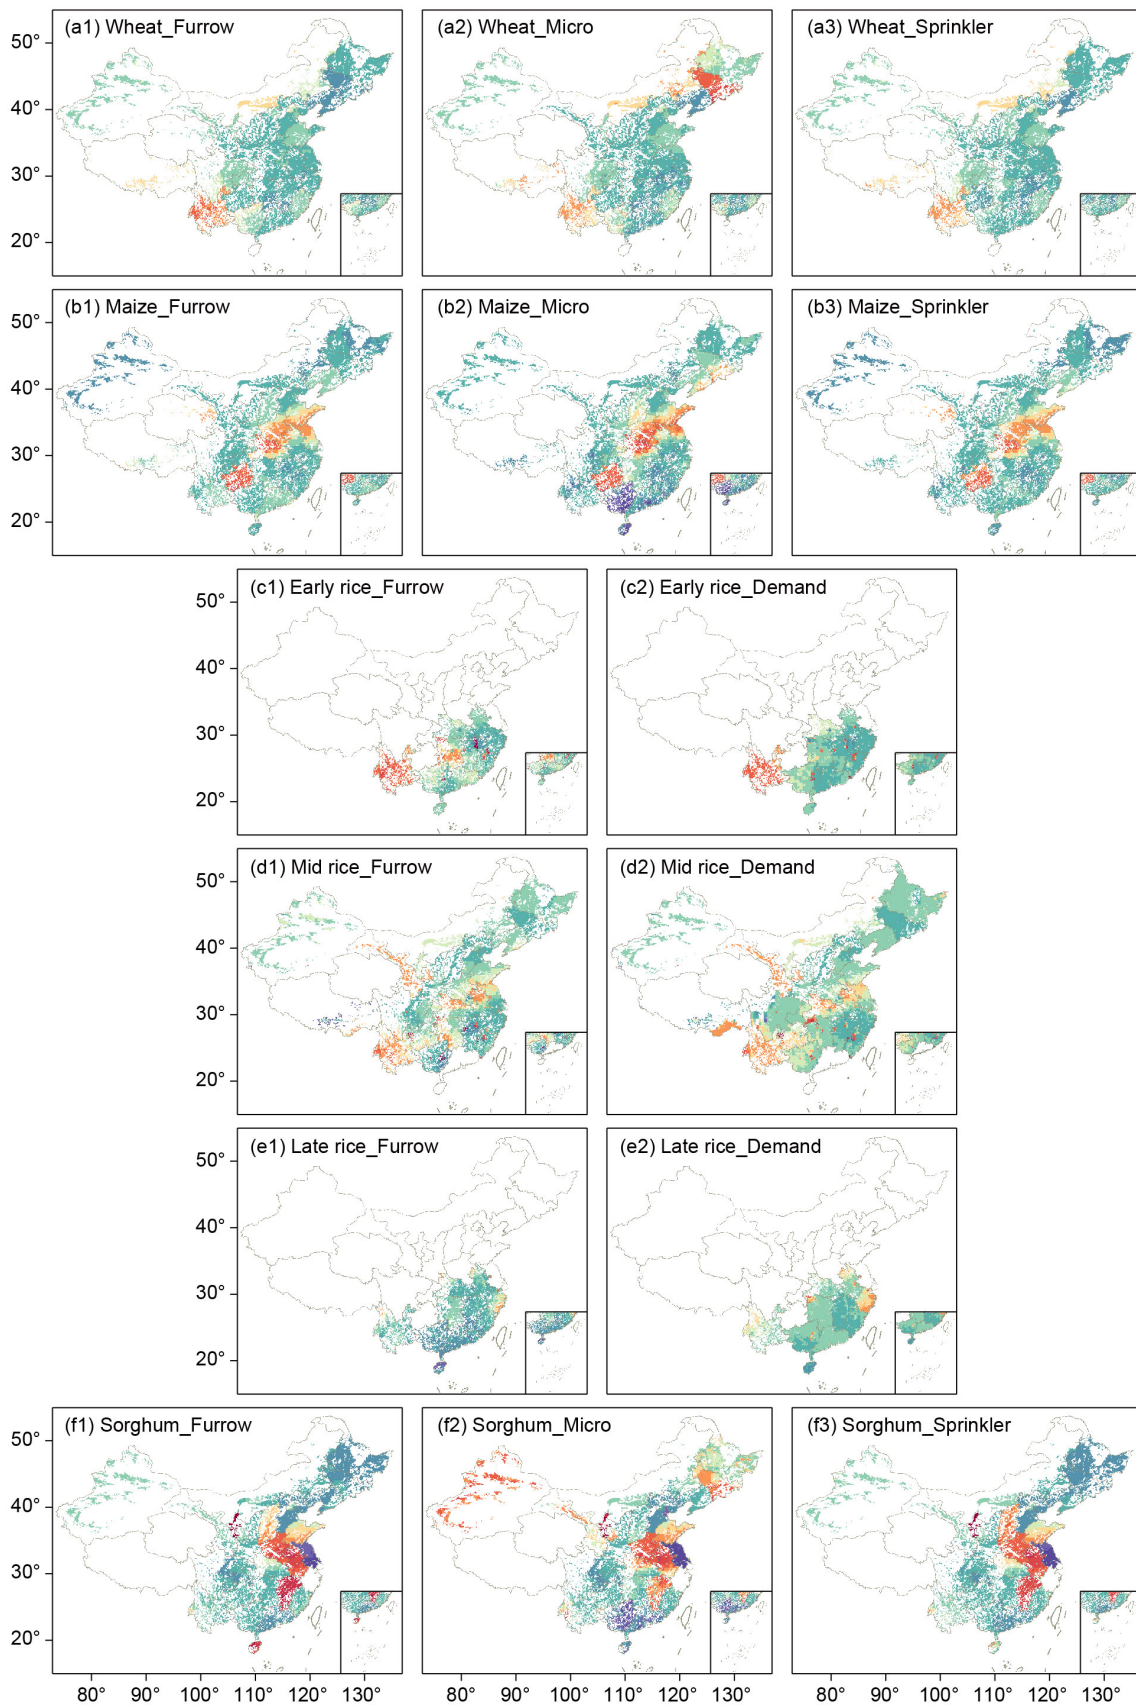



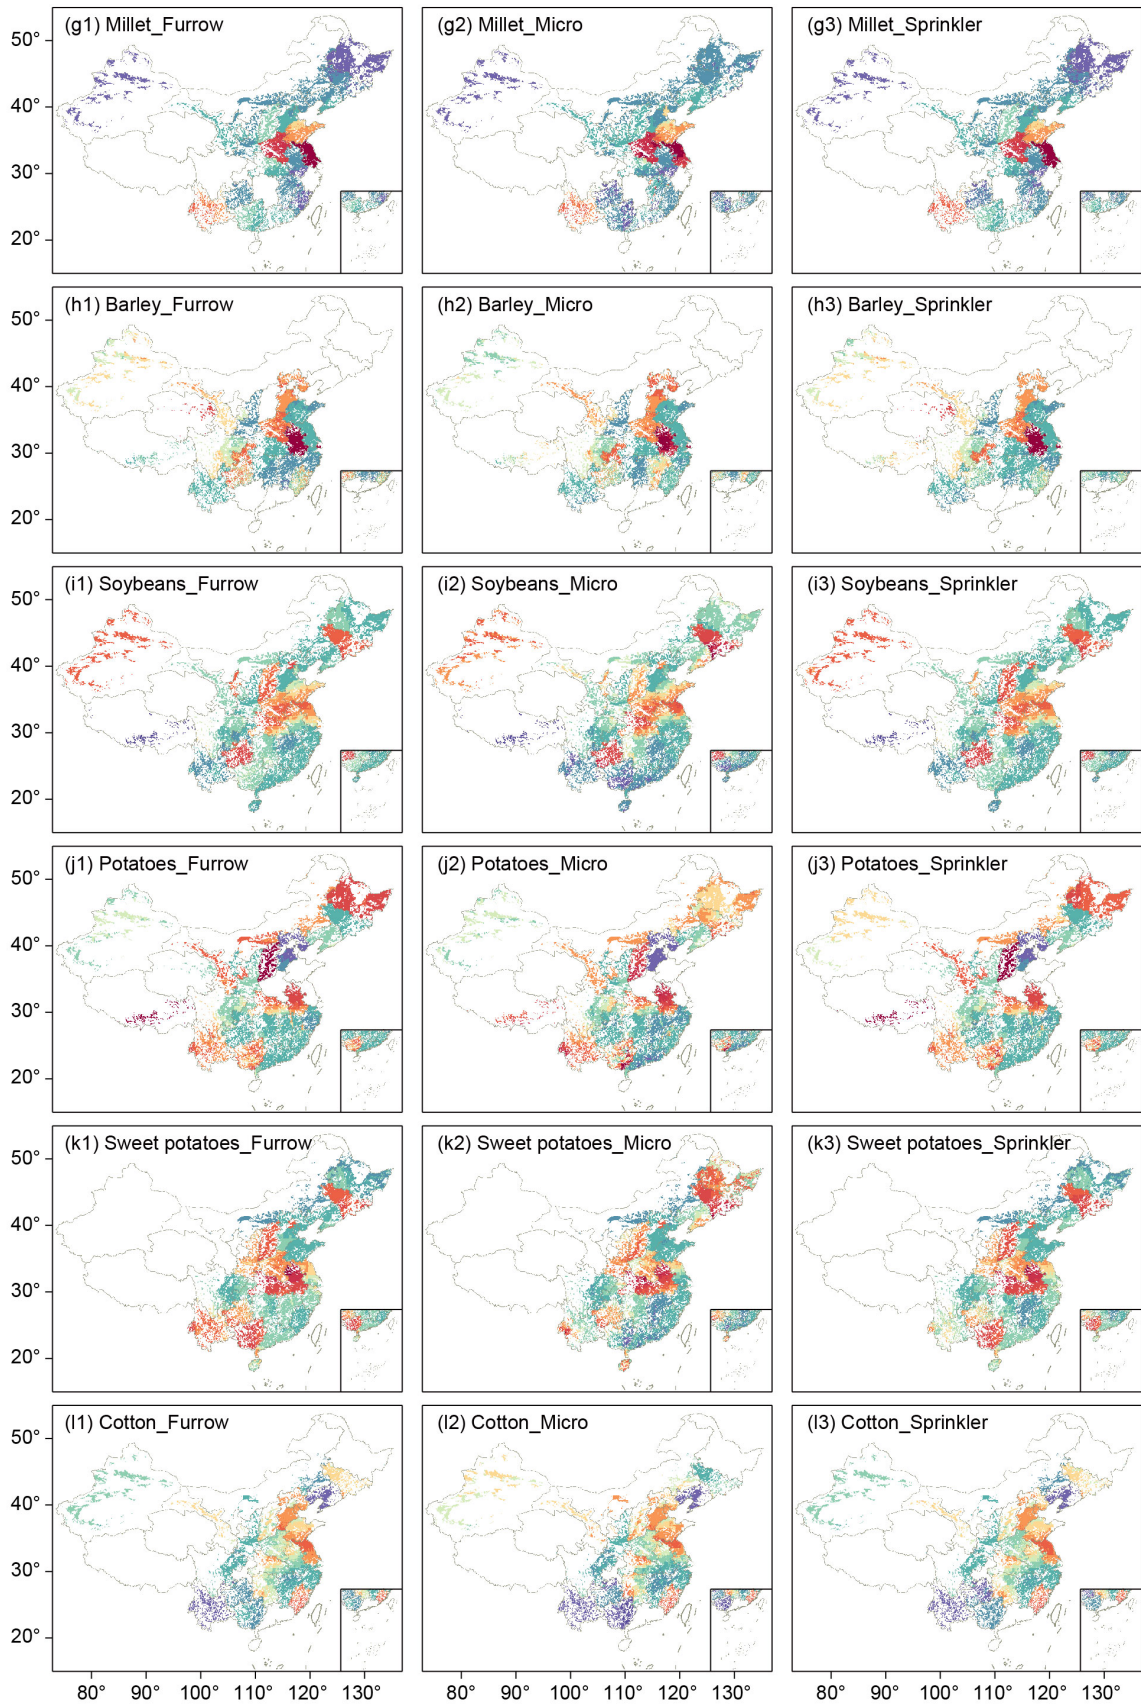



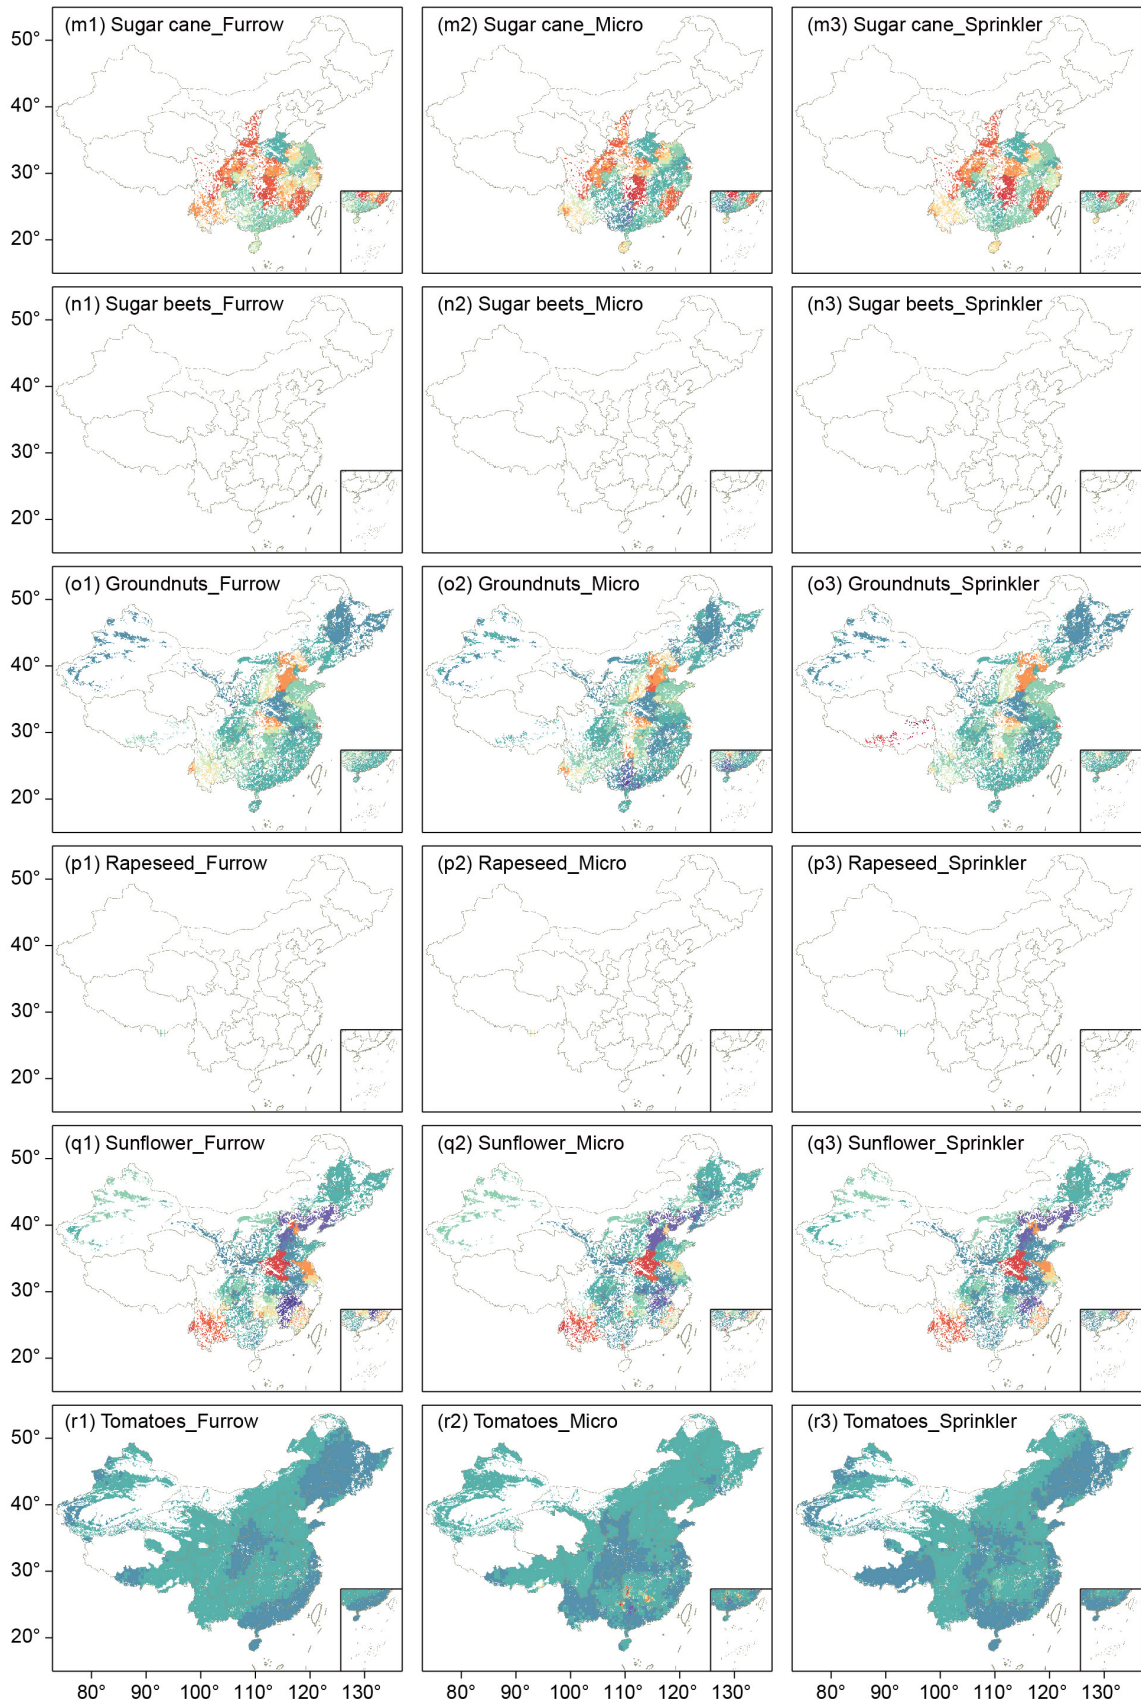

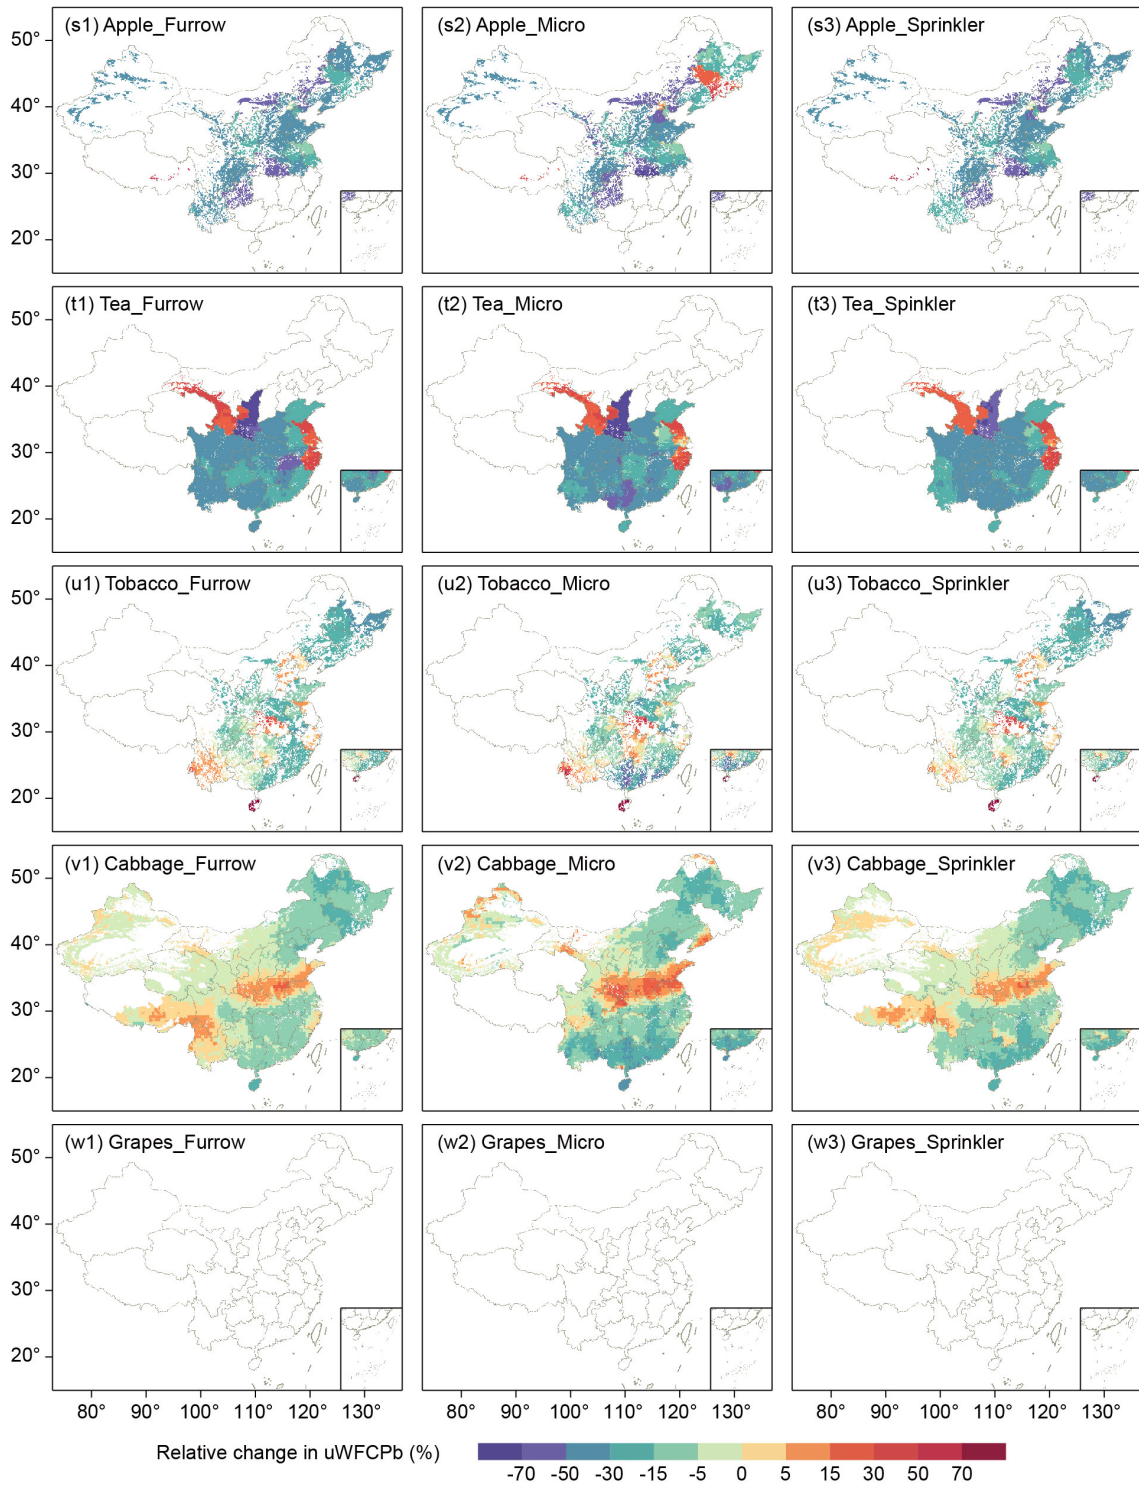

**Fig. S24** Relative changes of the average gridded uWFCPb under different water supply and irrigation practices for 2000-2009 to that for 2010-2018.



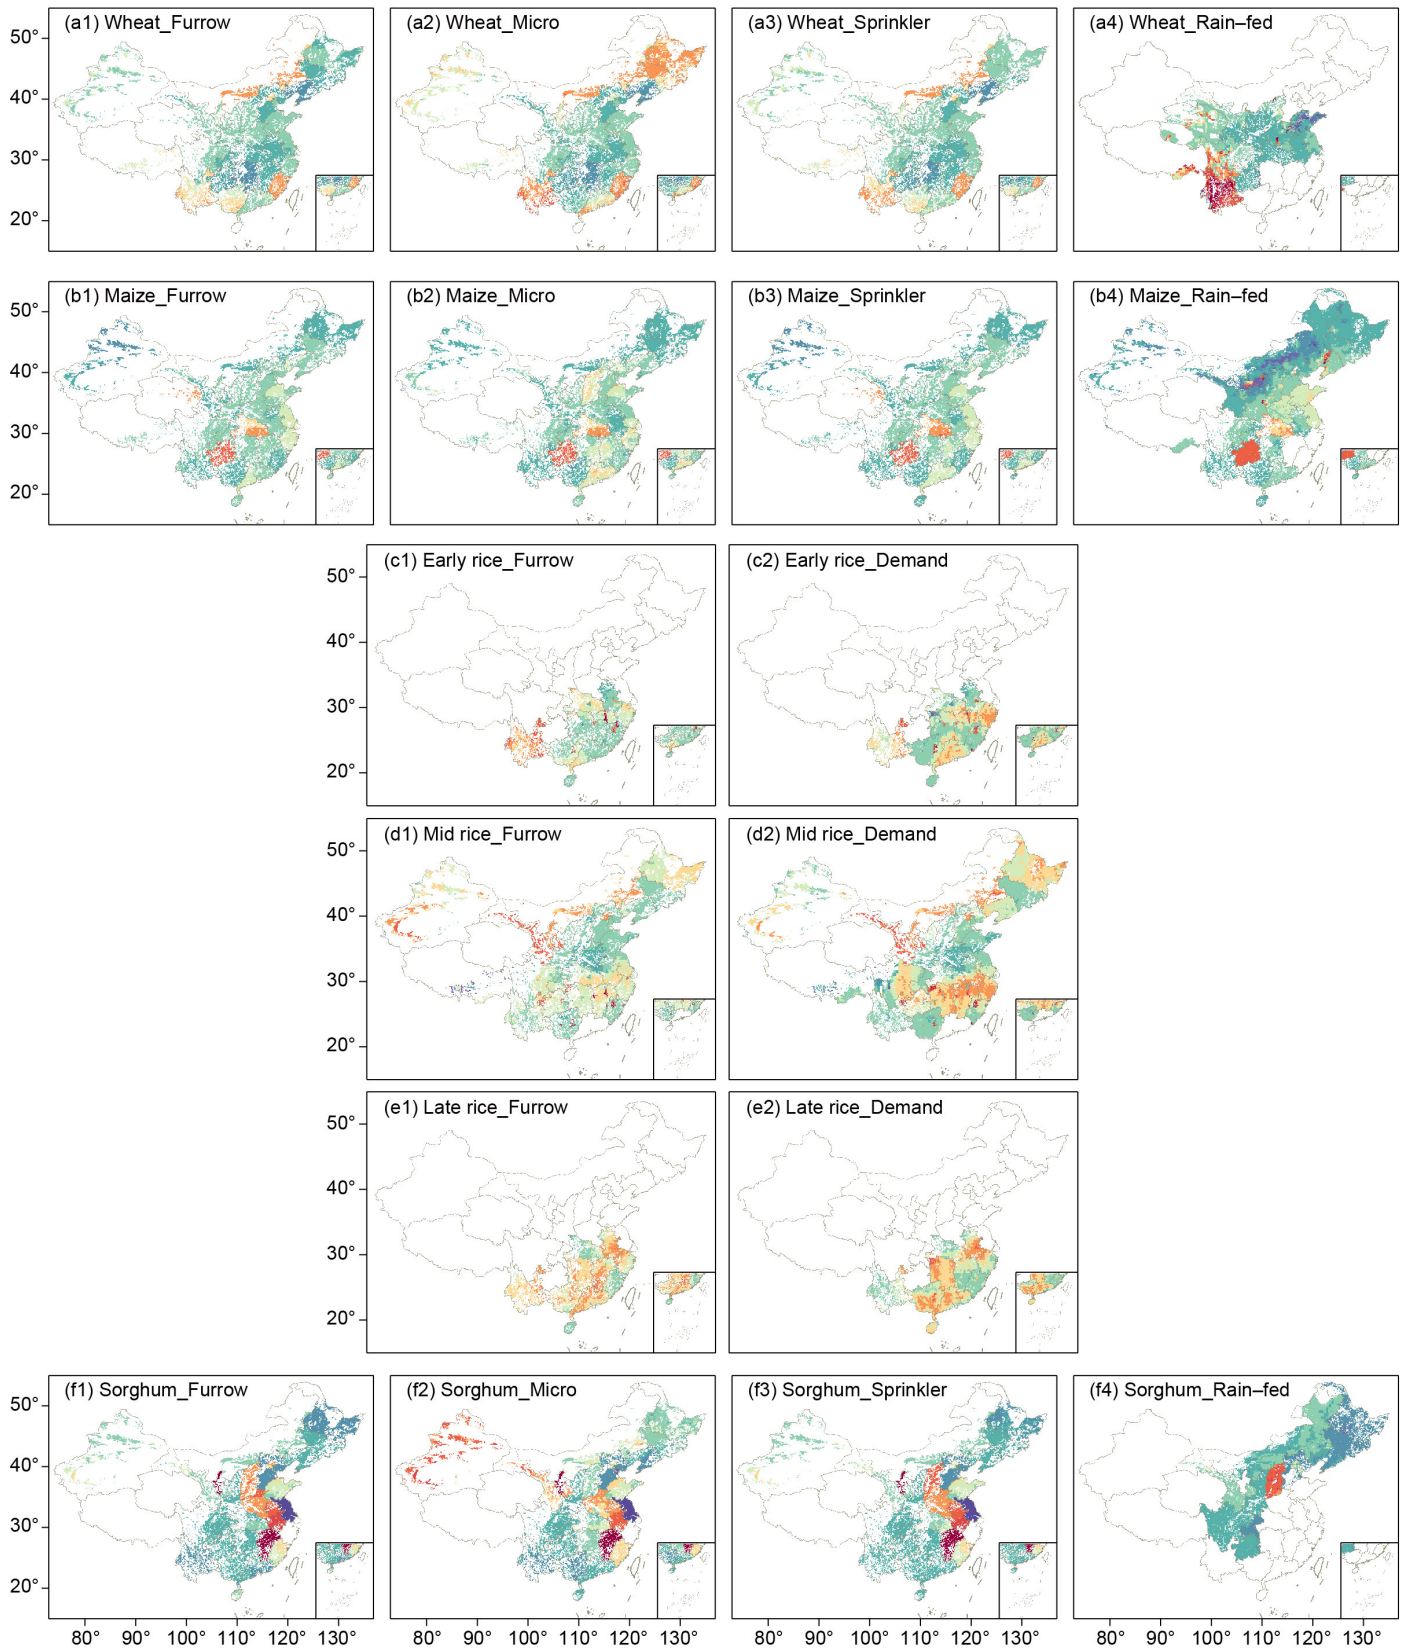



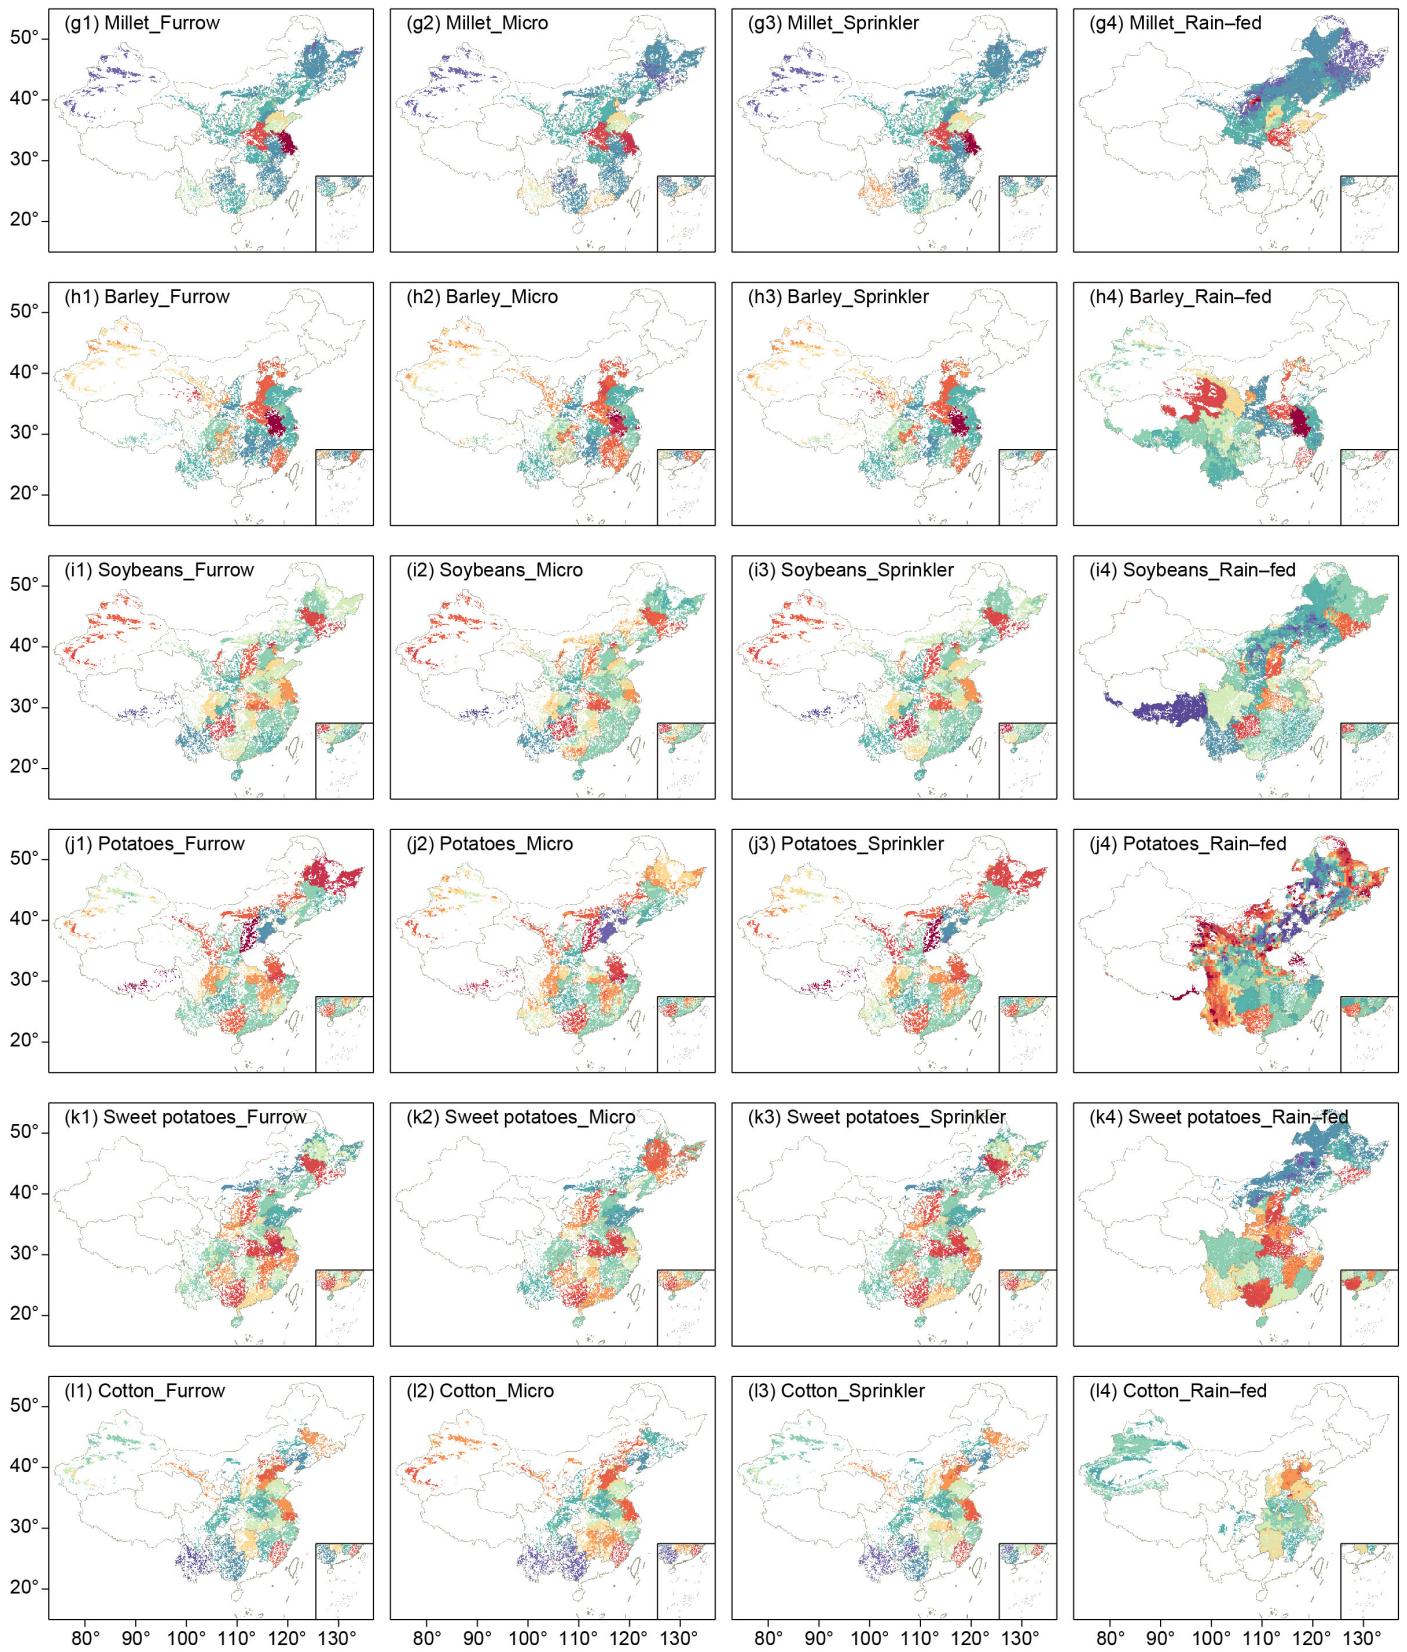

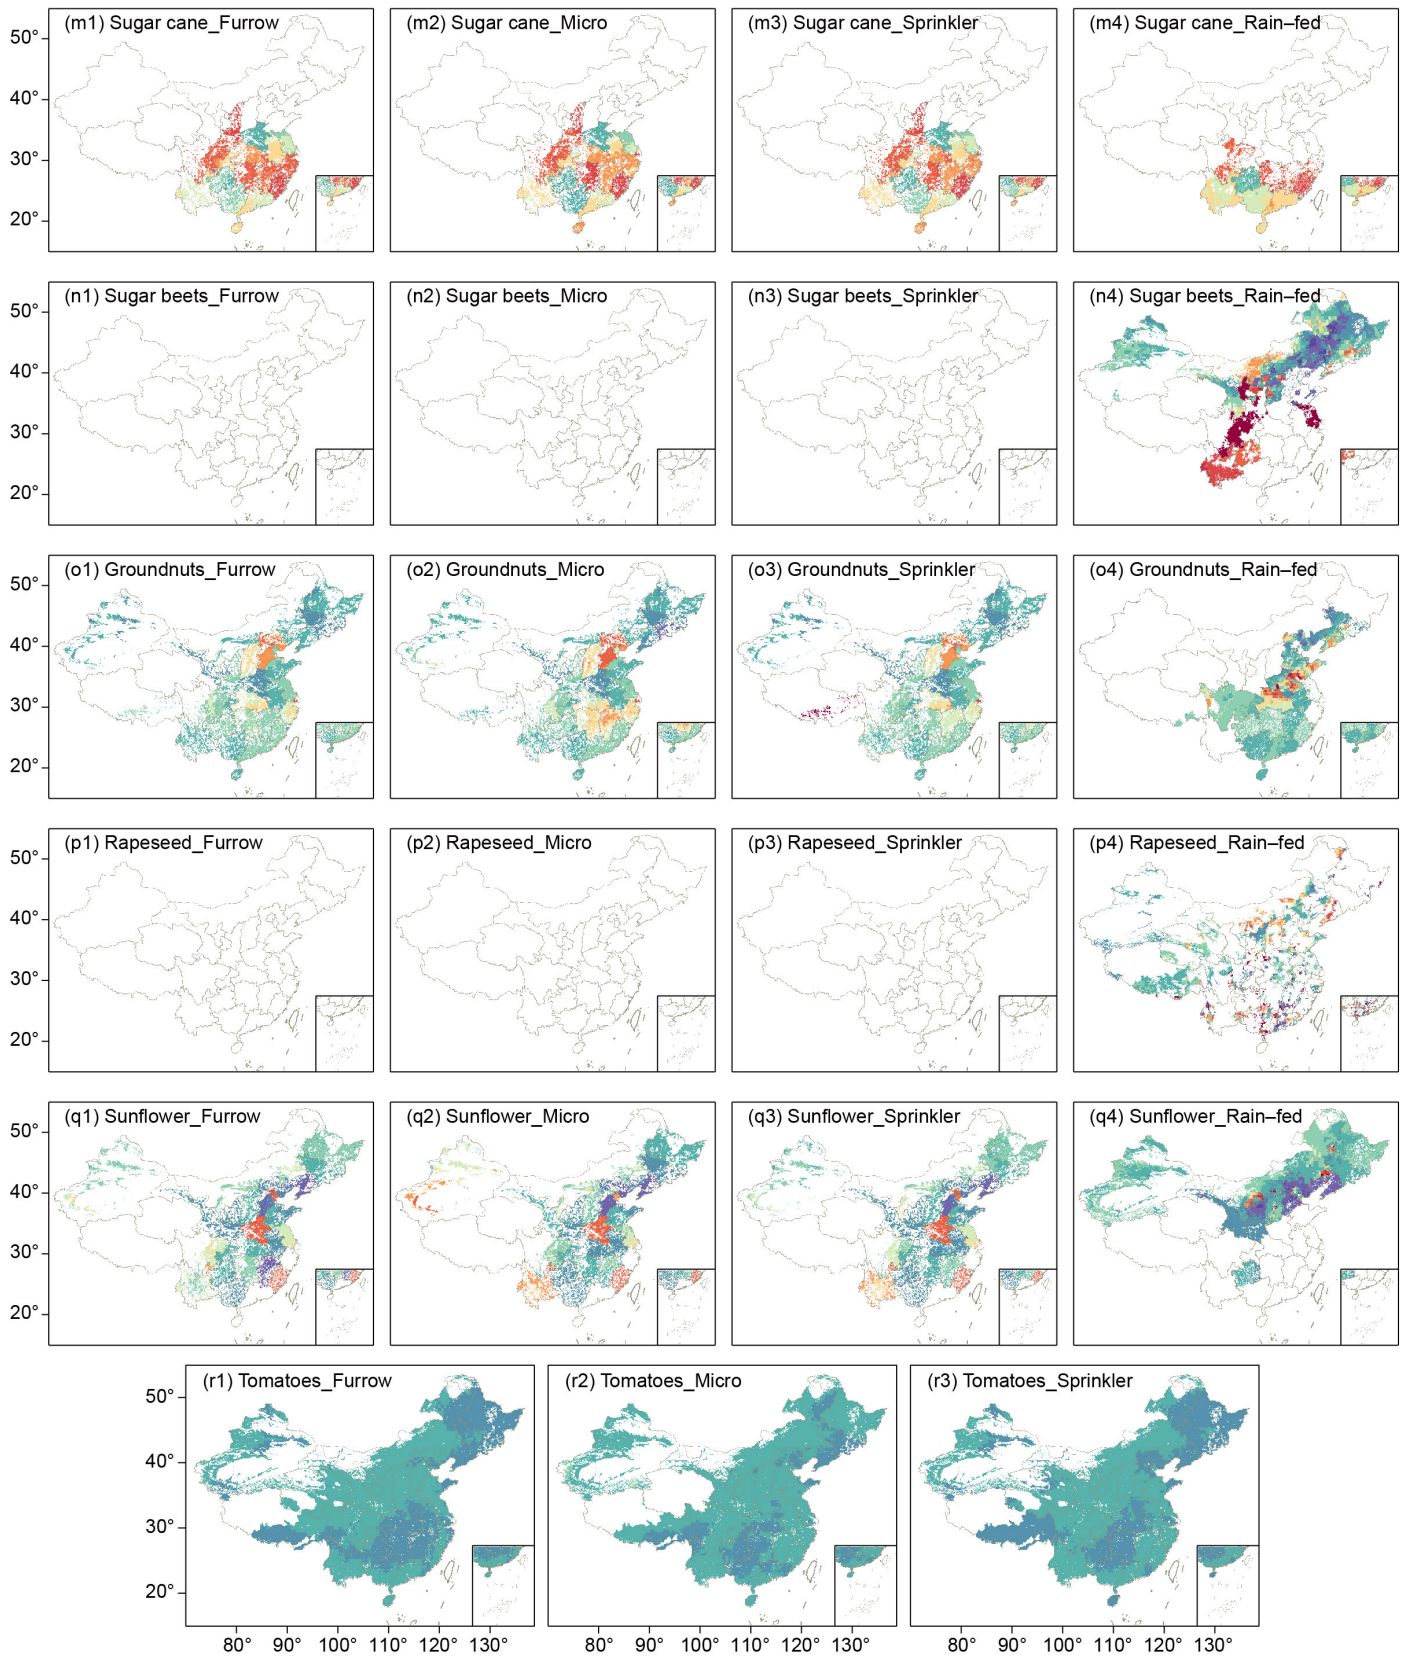



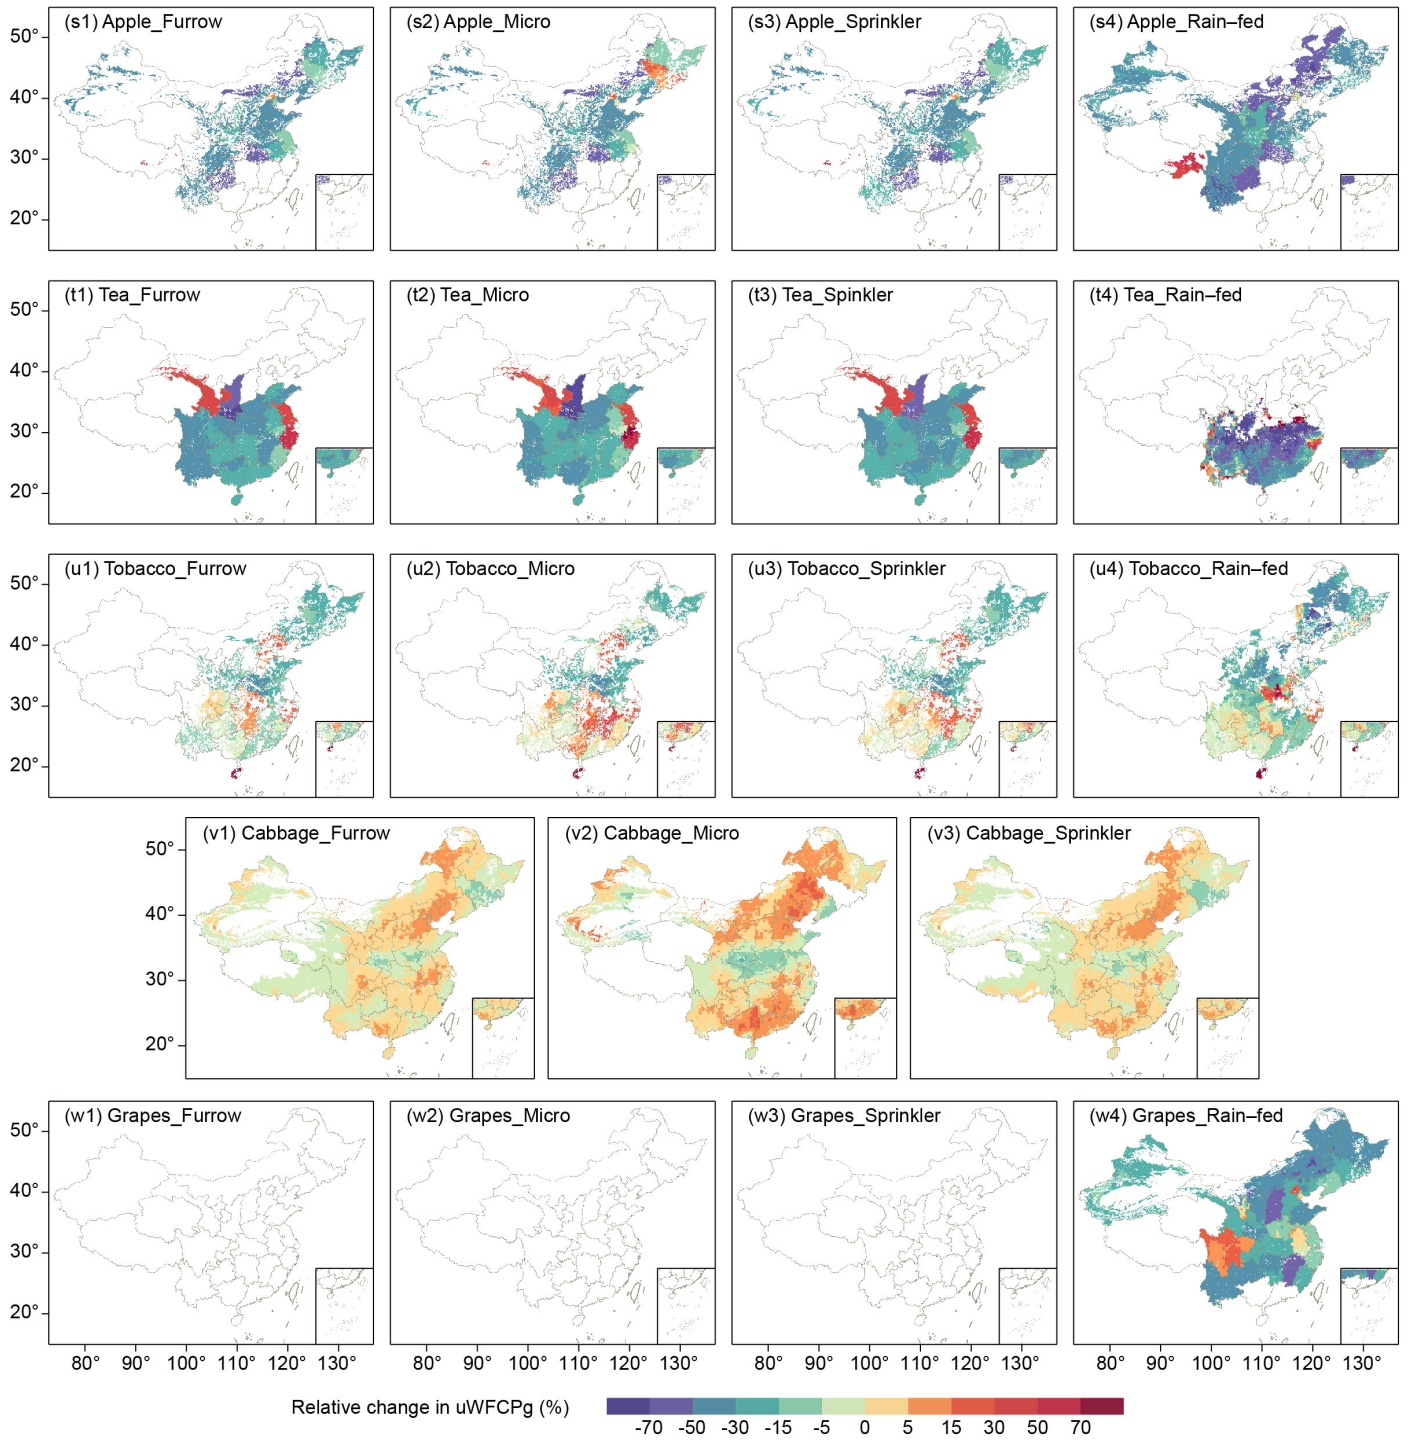

**Fig. S25** Relative changes of the average gridded uWFCPg under different water supply and irrigation practices for 2000-2009 to that for 2010-2018.



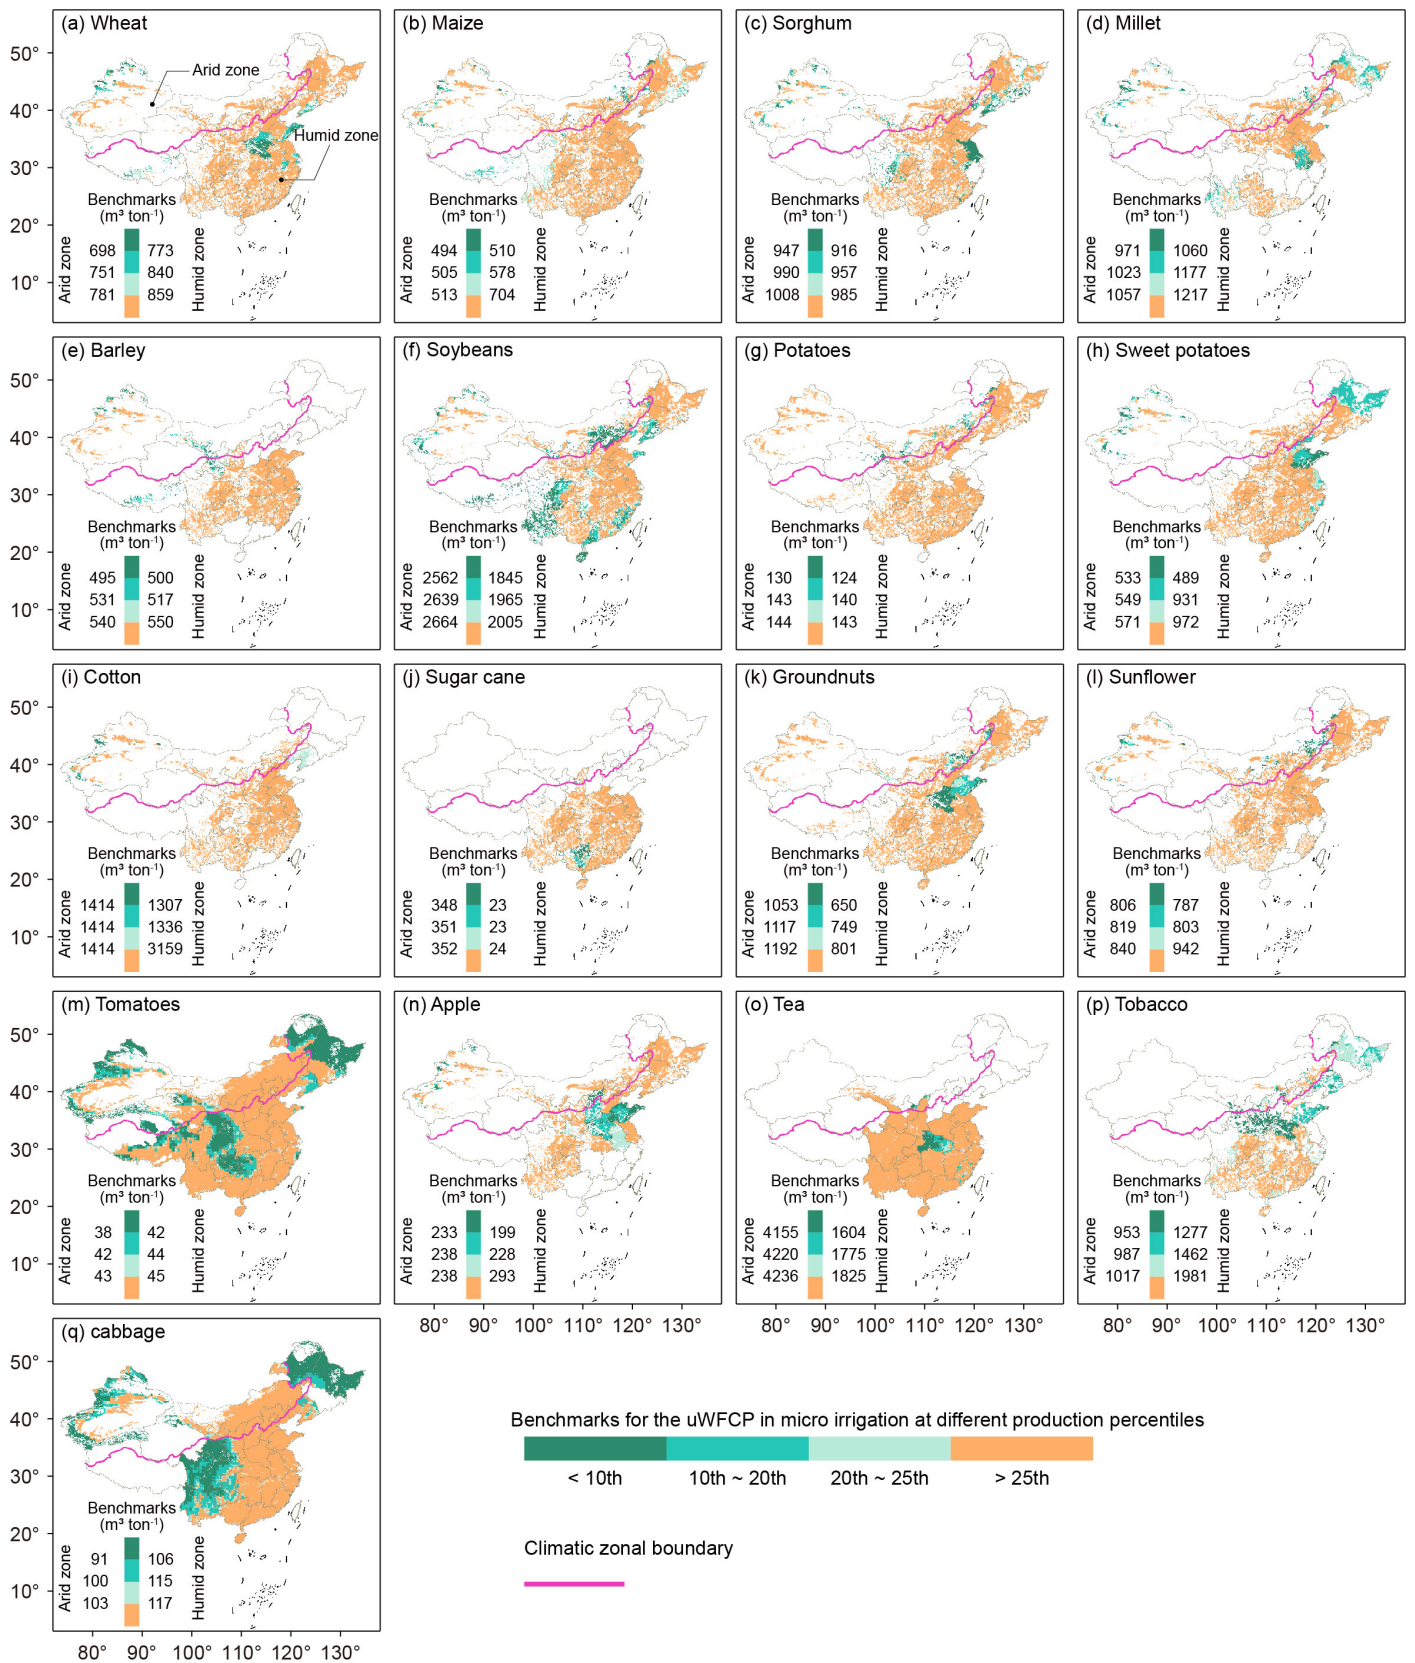

**Fig. S26** Benchmarks for the uWFCP at different production percentiles under micro irrigation in China by 2018.

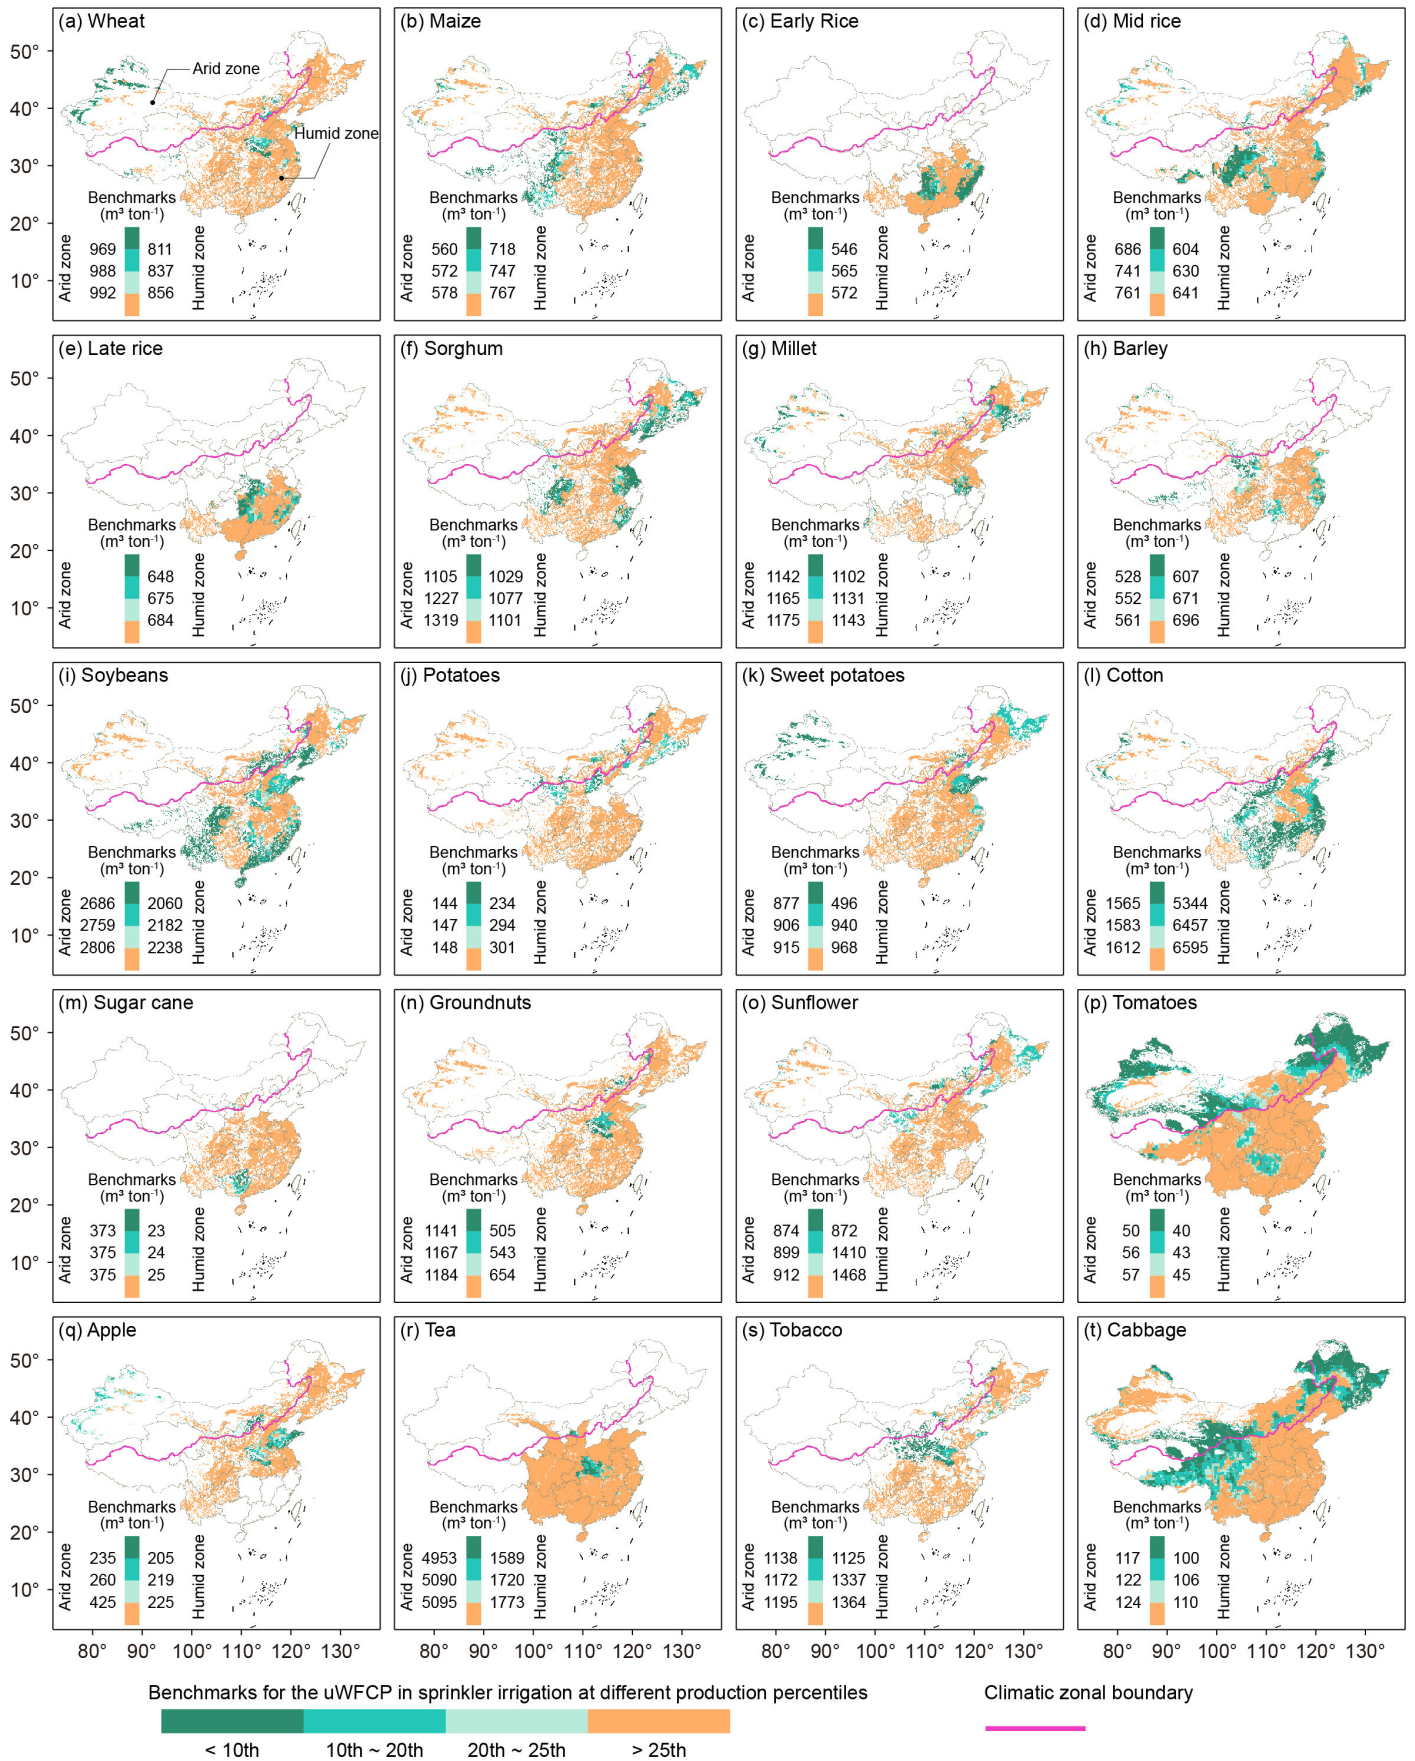

Fig. S27 Benchmarks for the uWFCP at different production percentiles under sprinkler irrigation in China by 2018.



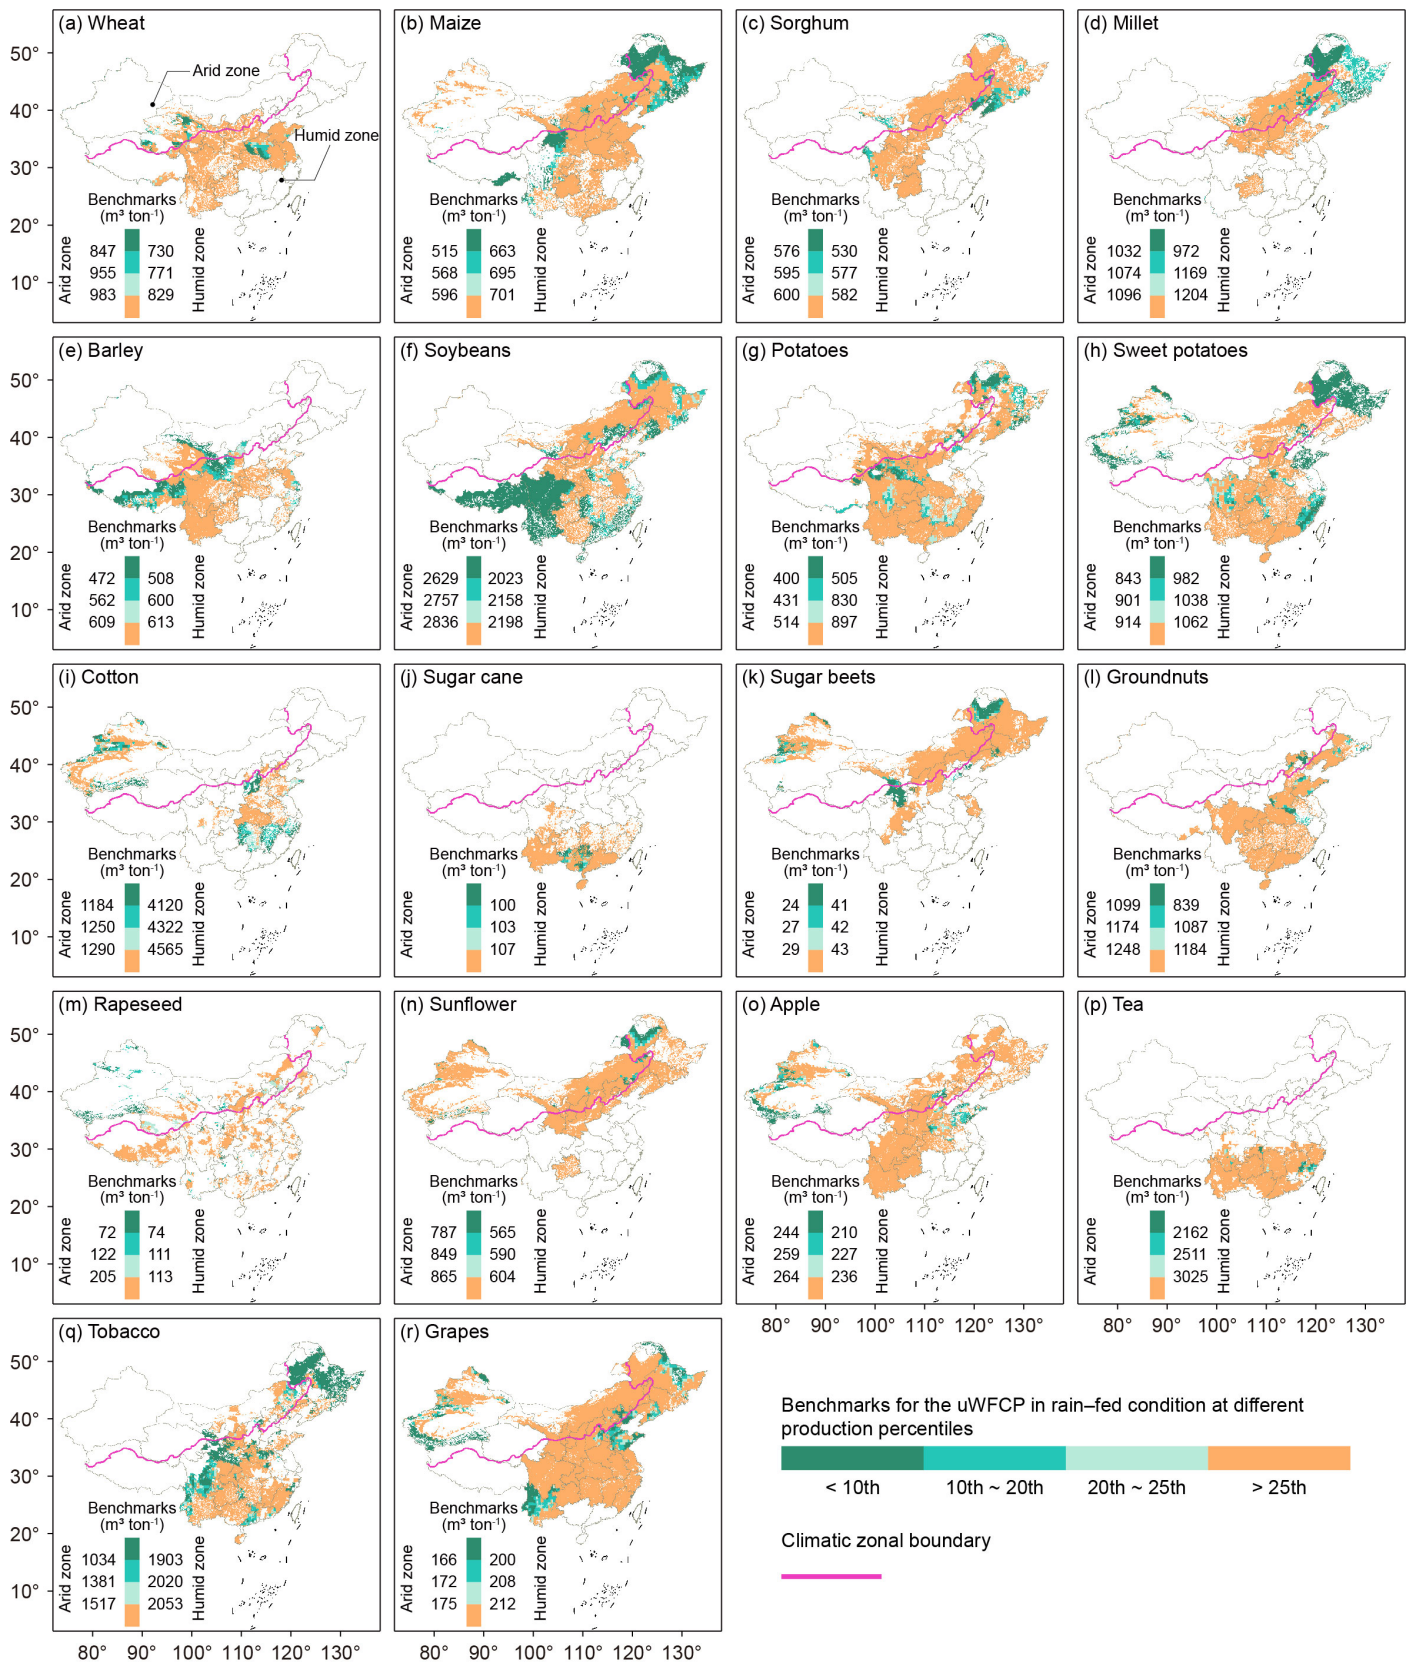

**Fig. S28** Benchmarks for the uWFCP at different production percentiles under rain-fed conditions in China by 2018.



## Supplementary data and methods

### Planting area selection

Prior to initiating this study, we screened the required crop planting area data based on the following criteria: distinguishing crop types, separating irrigated and rainfed areas, long-term temporal resolution, and high spatial resolution. MIRCA2000 was selected because it meets the objectives of this study. This is also the reason that the MIRCA2000 dataset is still the most widely used for crop water consumption or requirement dataset making (e.g., Hoch et al., 2023; Li et al., 2023; Ruess et al., 2022; Lutz et al., 2022; Liu et al., 2022; Chiarelli et al., 2022; Chiarelli et al., 2020; Rosa et al., 2020). In order to improving the reliability of the input land use data, the proportional scaling approach based on the MIRCA2000 dataset have been applied in numerous studies in this field (Sloat et al., 2020; Yue et al., 2022; Mialyk et al., 2022; Wang et al., 2019).

Table S2 presents the crop planting area and irrigated area data products. Recent years have witnessed the emergence of numerous long-term and high-resolution irrigation area datasets for China, thanks to the combined application of remote sensing technology and machine learning approaches. However, these datasets do not differentiate between irrigated and rainfed cropping systems, and do not contain crop-specific planting information. These deficiencies fail to fulfill the original intentions of this study design.

**Table S2. Inventory of irrigated cropland data.**

| Source                               | Spatial coverage | Temporal resolution | Spatial resolution | Crop type distinction | Planting pattern                |
|--------------------------------------|------------------|---------------------|--------------------|-----------------------|---------------------------------|
| Zhang et al., 2022                   | China            | 2000-2019           | 500 m              | No                    | Only irrigated croplands        |
| Zhang et al., 2022                   | China            | 2000                | 250 m              | No                    | Only irrigated croplands        |
| Zhu et al., 2014                     | China            | 2000                | 5 arcmin           | No                    | Only irrigated croplands        |
| GFSAD1KCD                            | Globe            | 2007-2012           | 1000 m             | 6 crops               | Irrigated and rainfed croplands |
| GAEZ+<br>(Grogan et al., 2022)       | Globe            | 2015                | 5 arcmin           | 26 crops              | Irrigated and rainfed croplands |
| SPAM<br>(IFPRI 2019)                 | Globe            | 2000, 2005, 2010    | 5 arcmin           | 42 crops              | Irrigated and rainfed croplands |
| MIRCA2000<br>(Portmann et al., 2010) | Globe            | 2000                | 5 arcmin           | 26 crops              | Irrigated and rainfed croplands |

Global scale data compensates the aforementioned deficiencies to some extent. However, it is worth mentioning that existing global databases have certain limitations, including a limited range of crop types and intermittent time series. For instance, the SPAM dataset is only publicly available for a few specific years 2000, 2005 and 2010, and interpolation is still required to fill in the

gaps. The GFSAD1KCD dataset encompasses a smaller variety of crop types.

We compared our 5 arcmin resolution of major crop areas, as calculated by the proportional invariant method, with the GAEZ+ and SPAM data products in the same year. The comparison results are shown in the figures below (Fig. S29–S32).

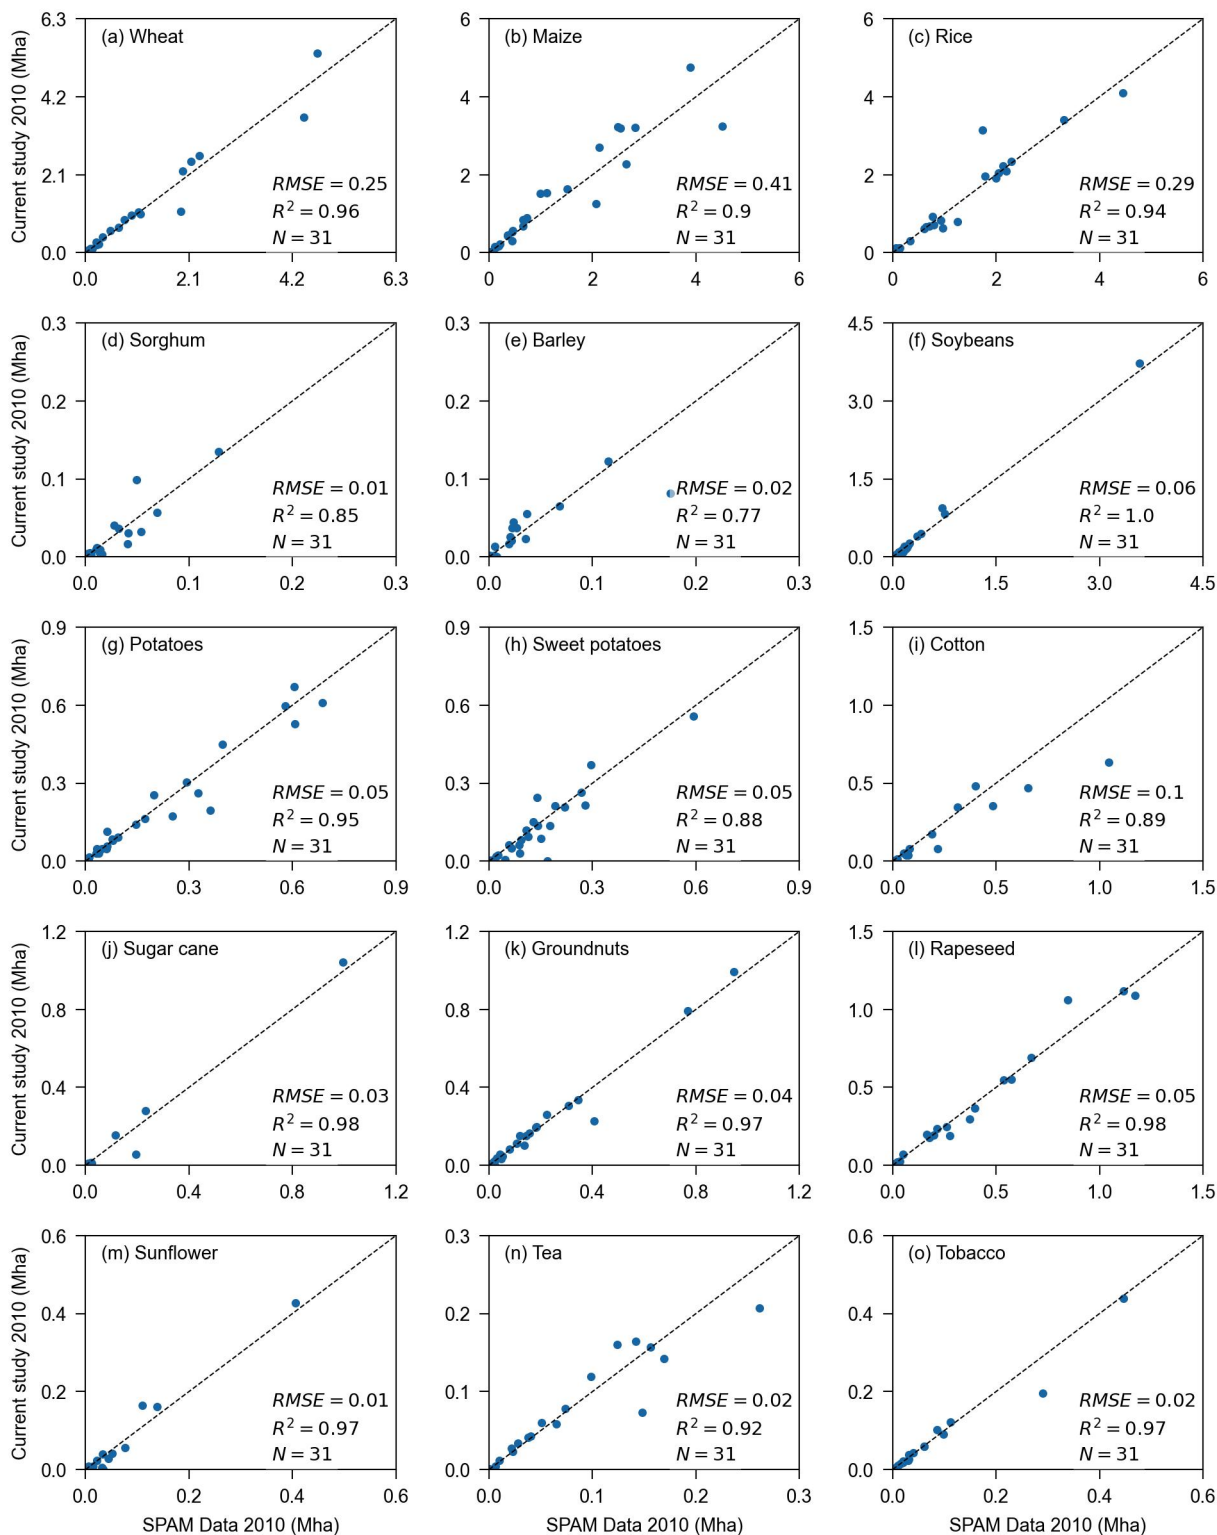

Fig. S29 Comparison of the current provincial area representing land coverage with the SPAM datasets.

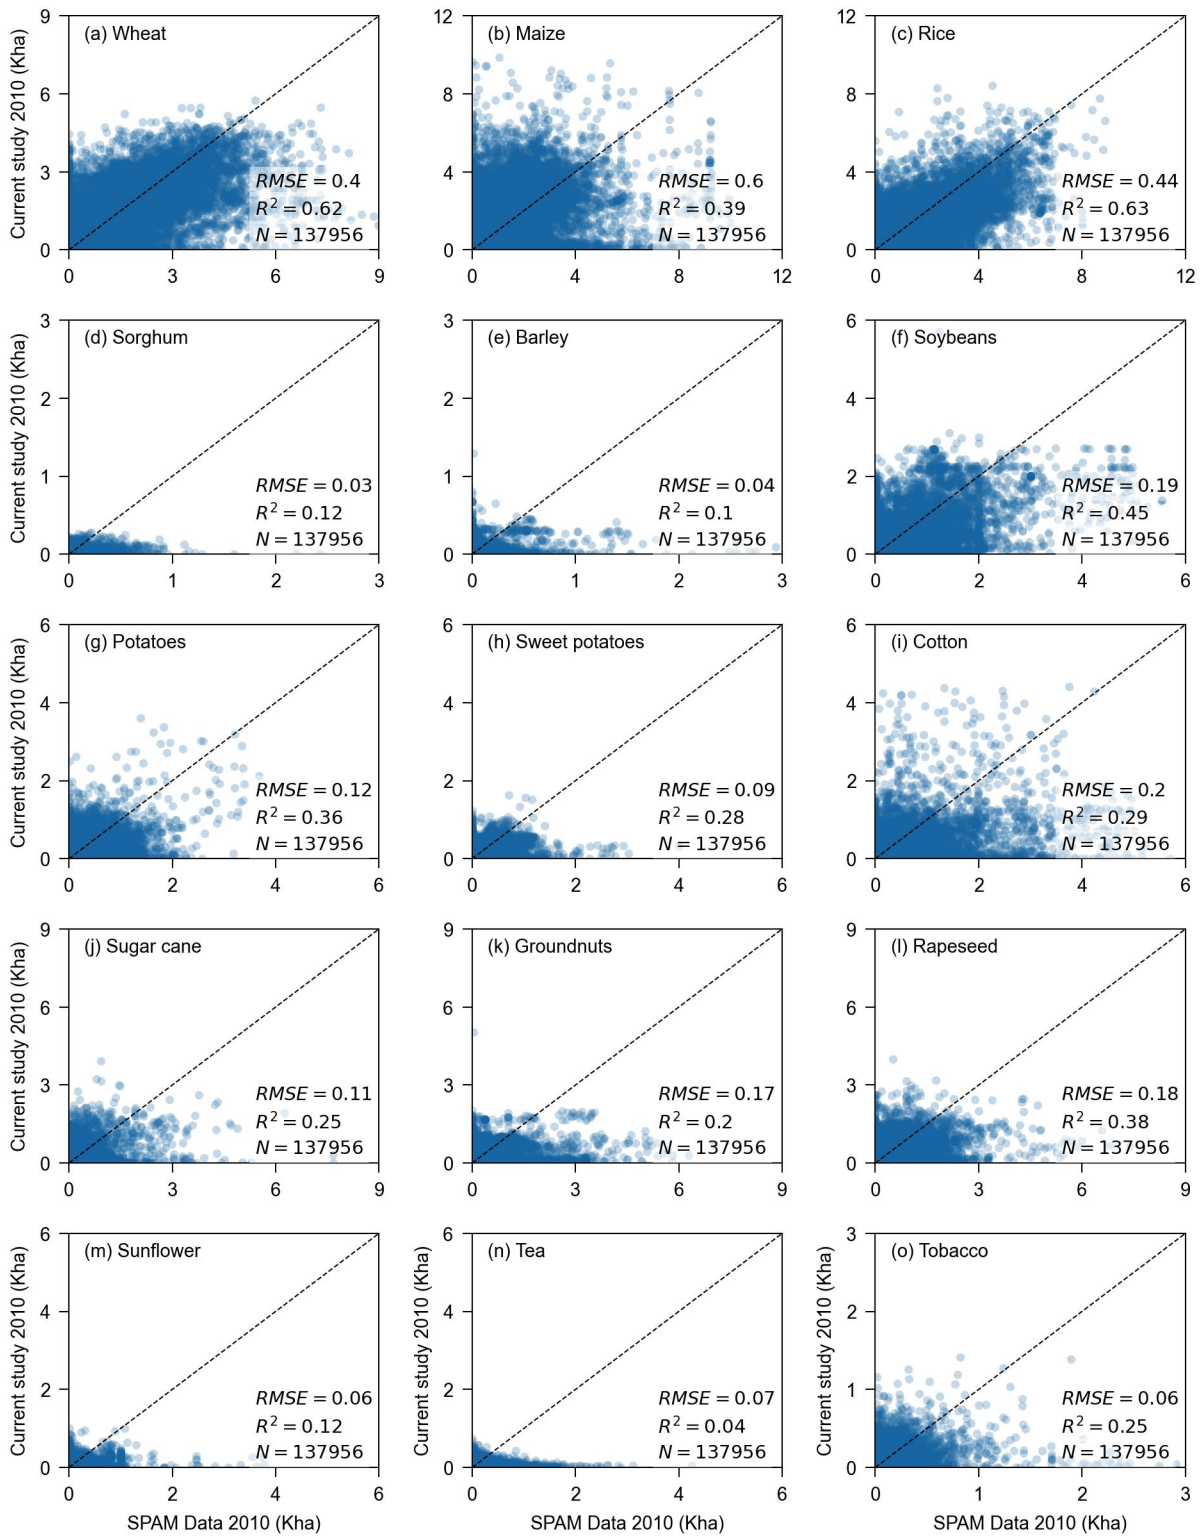

Fig. S30 Comparison of the current gridded area representing land coverage with the SPAM datasets.



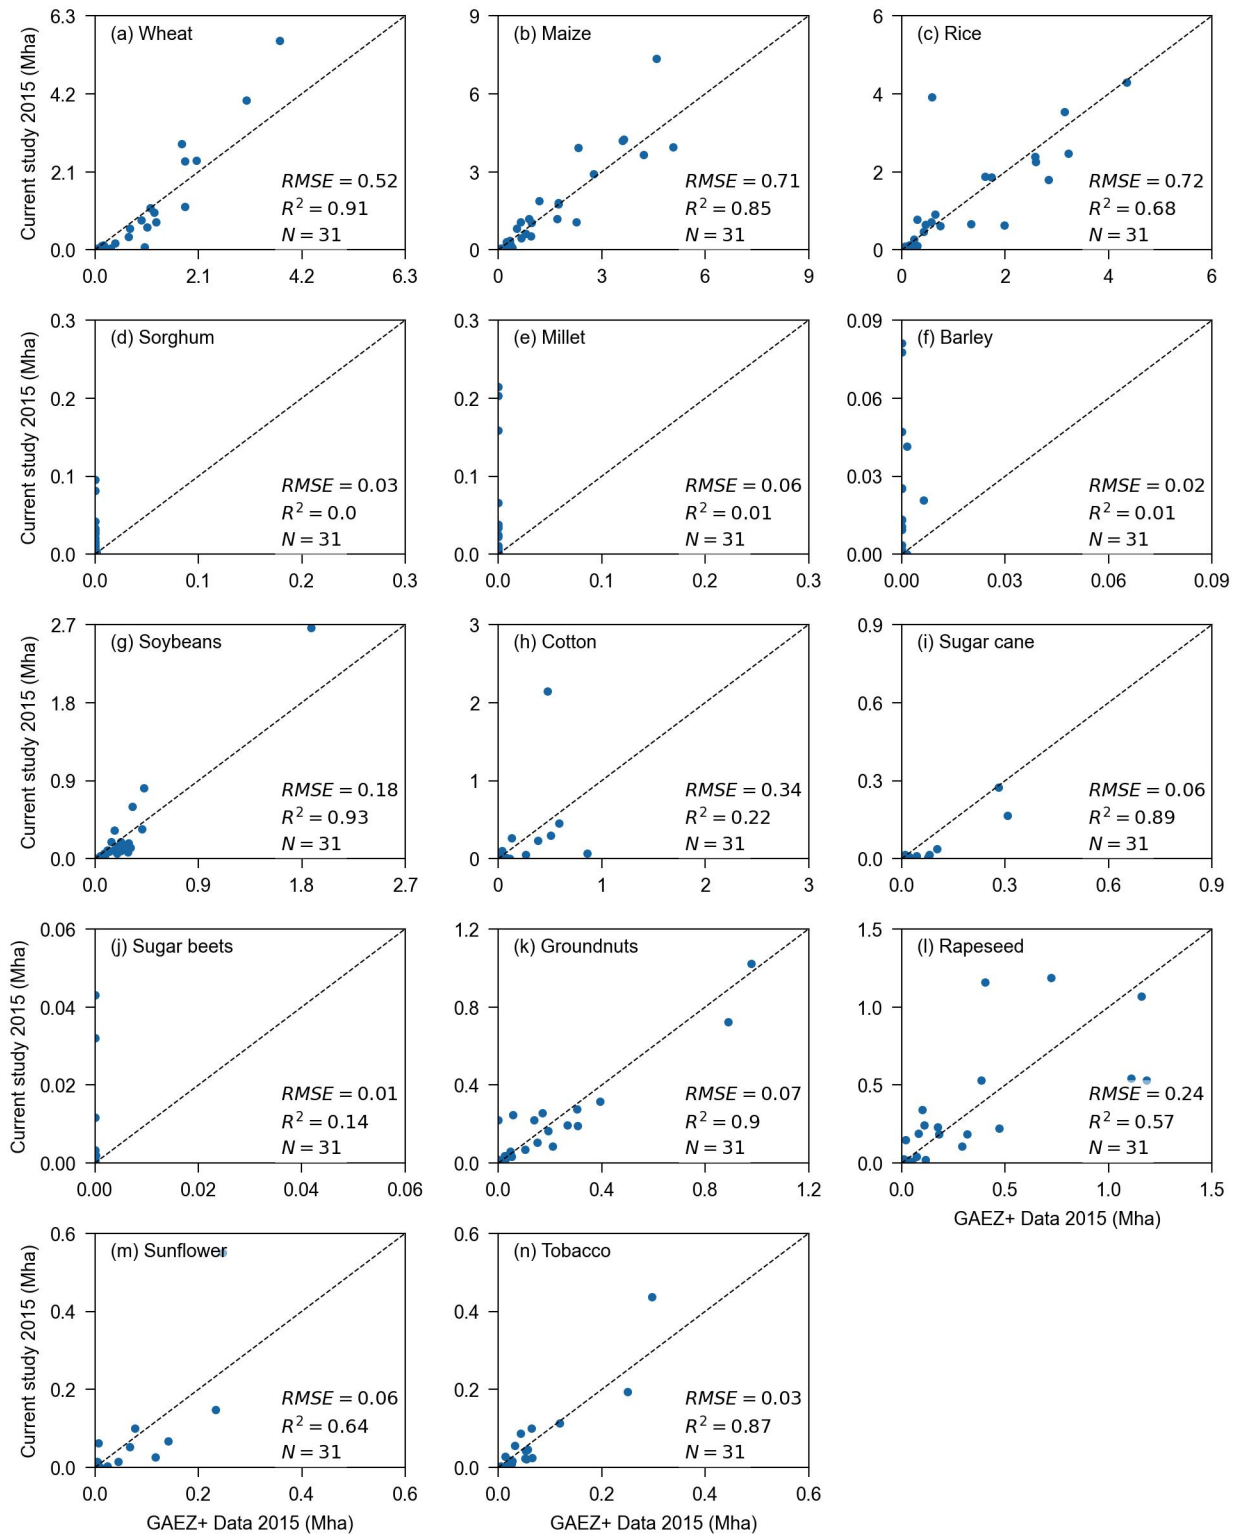

Fig. S31 Comparison of the current provincial area representing land coverage with the GAEZ+ datasets.

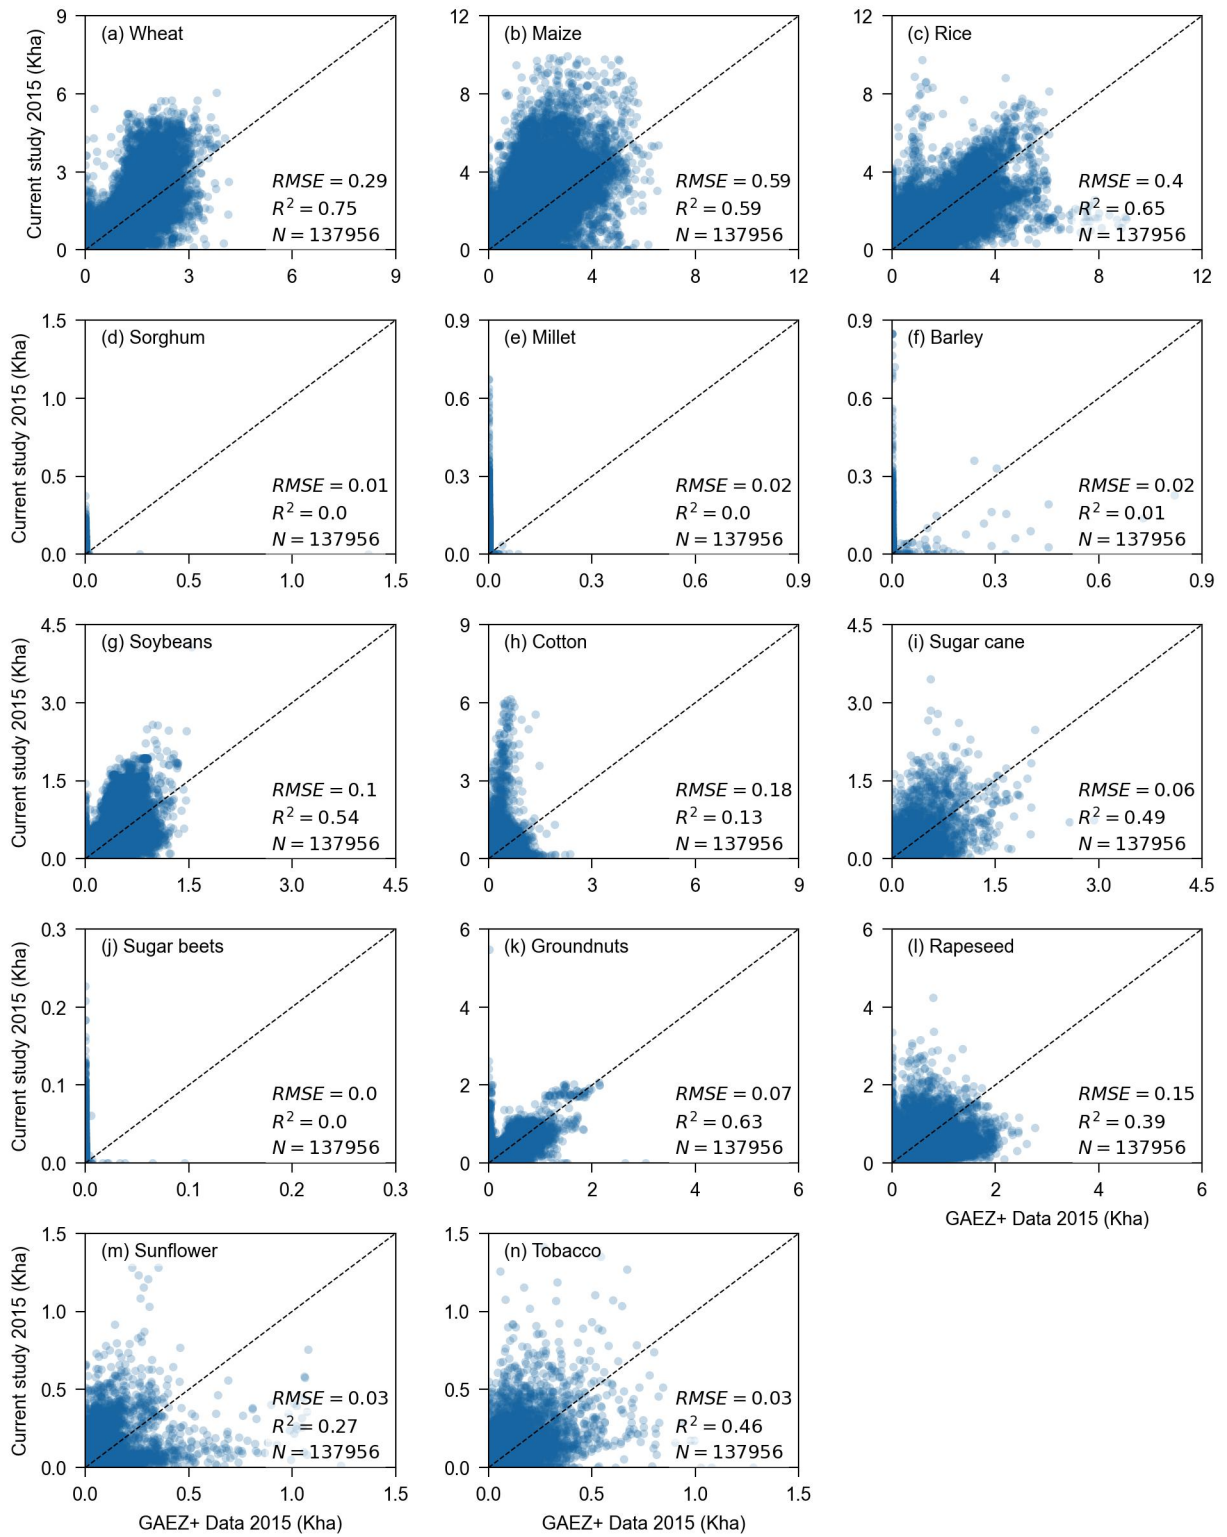

Fig. S32 Comparison of the current gridded area representing land coverage with the GAEZ+ datasets.

Validation results

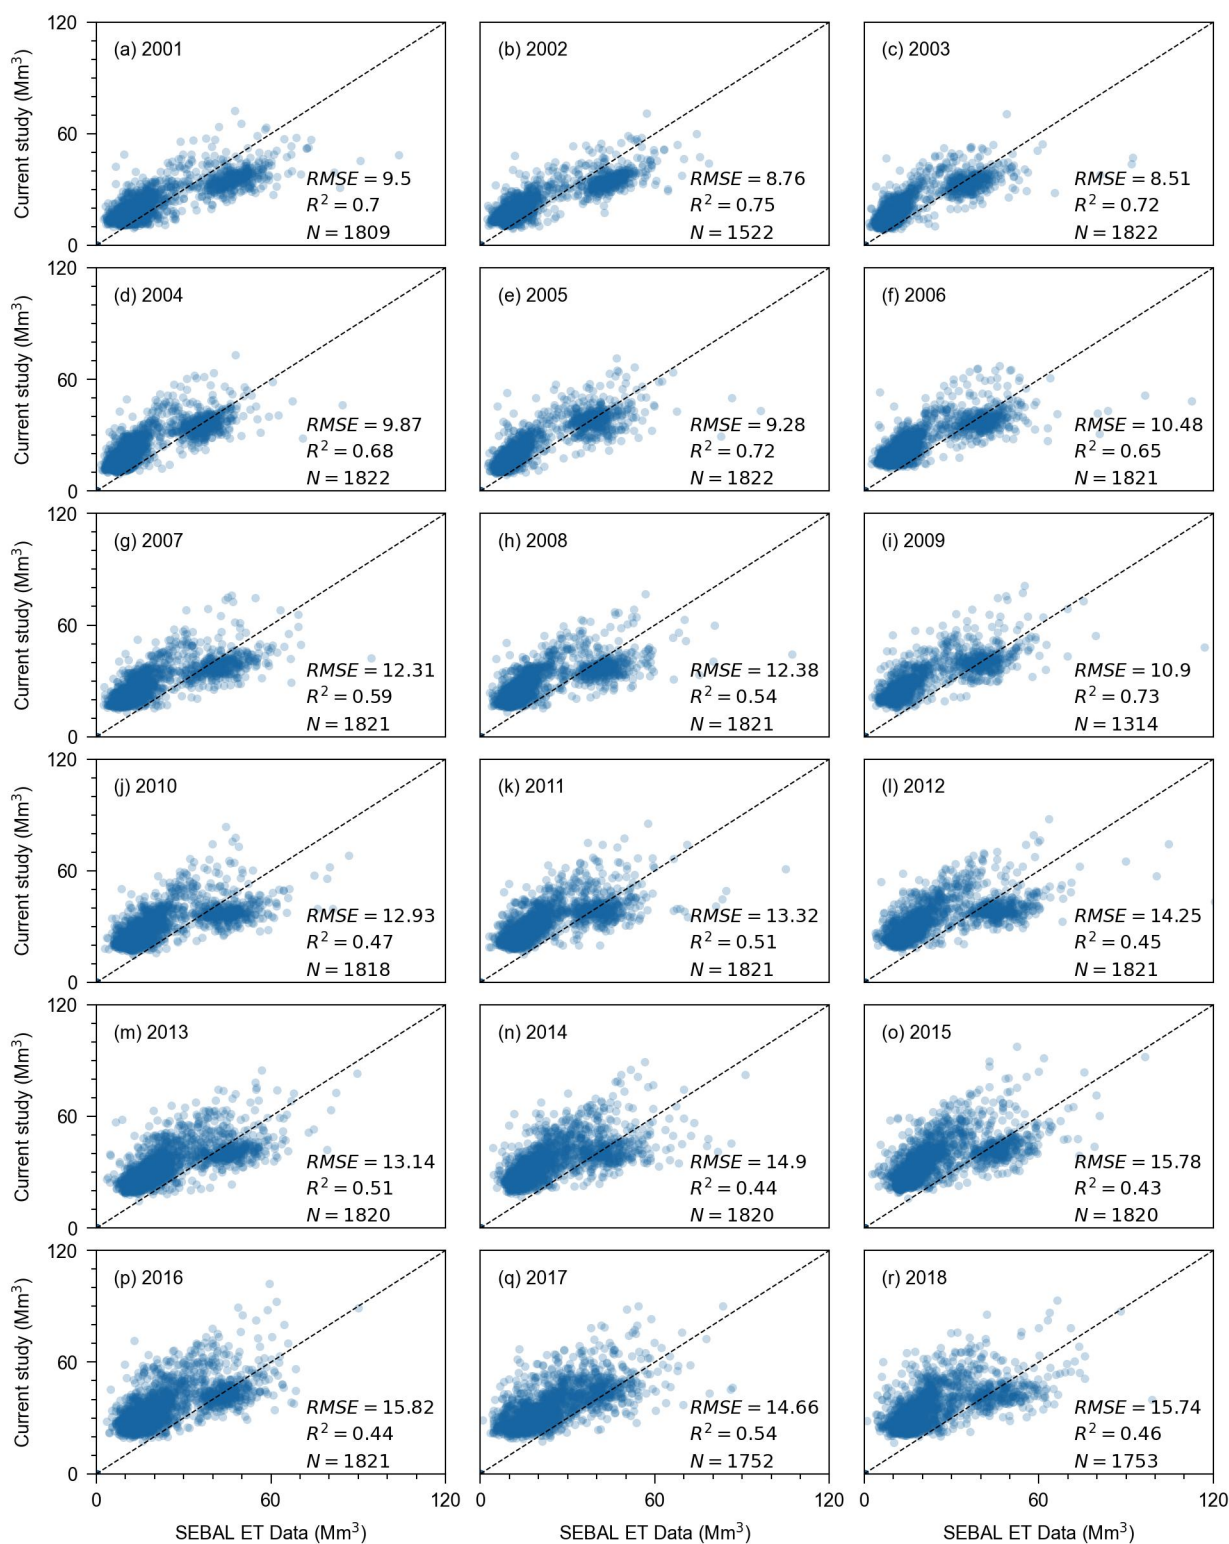

Figure S33. Validation of the evapotranspiration at croplands for the period April to August with SEBAL datasets (Cheng et al., 2021).



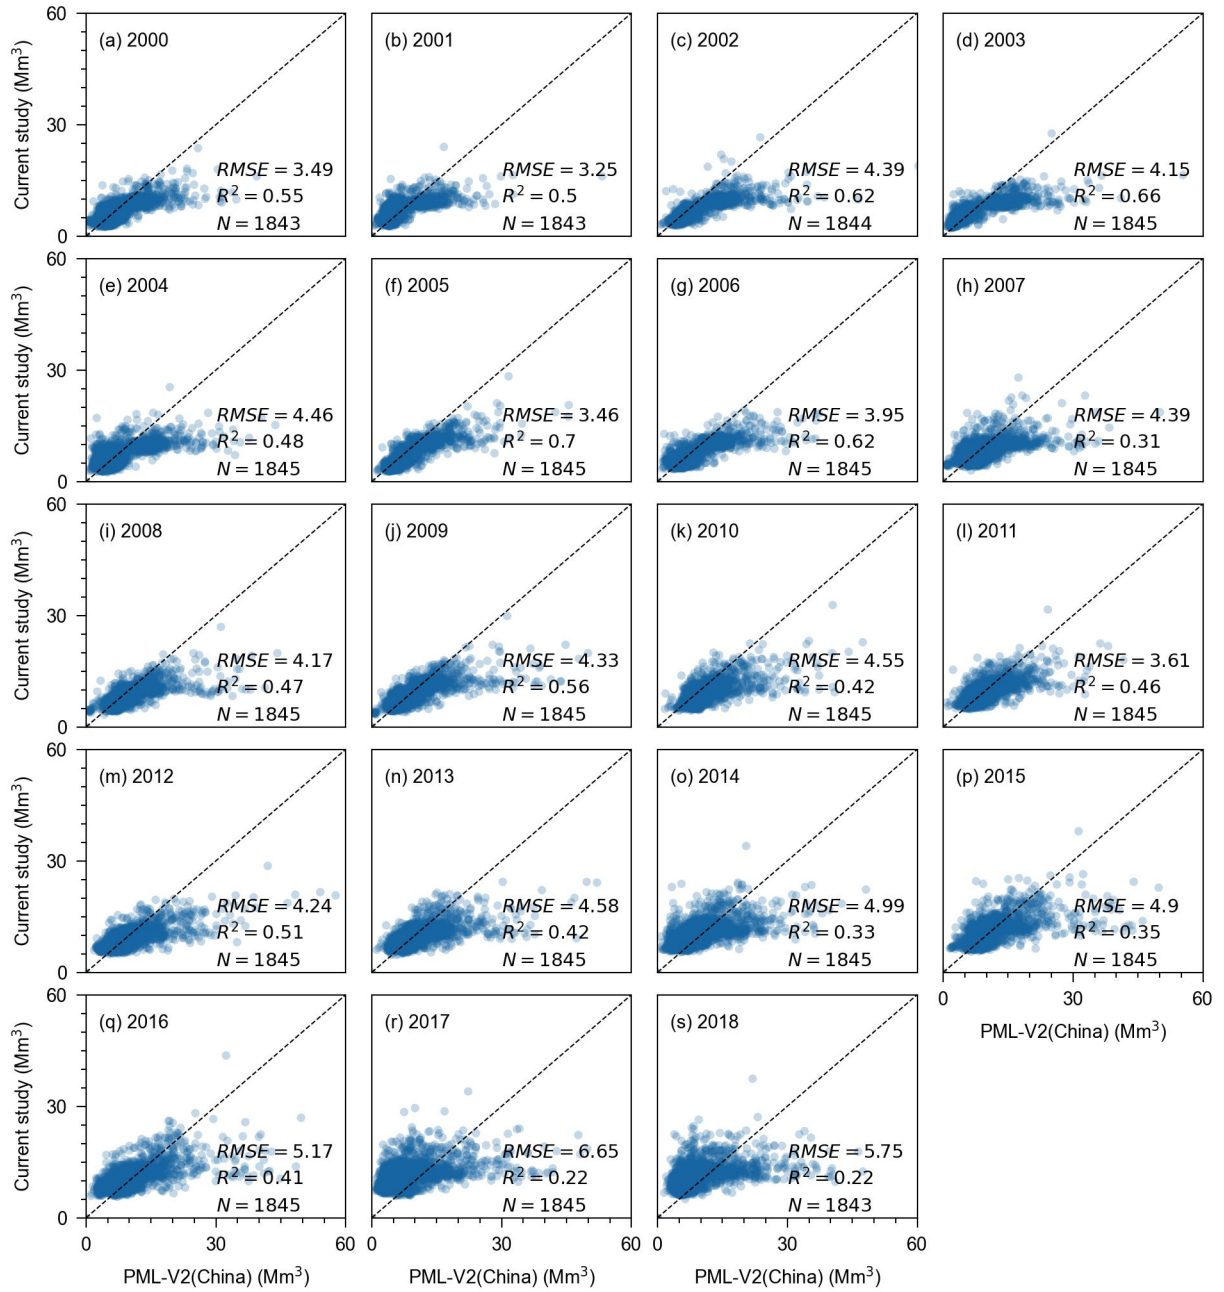

Figure S34. Validation of the evaporation at croplands for the period April to August with PML-V2(China) datasets (He et al., 2022).

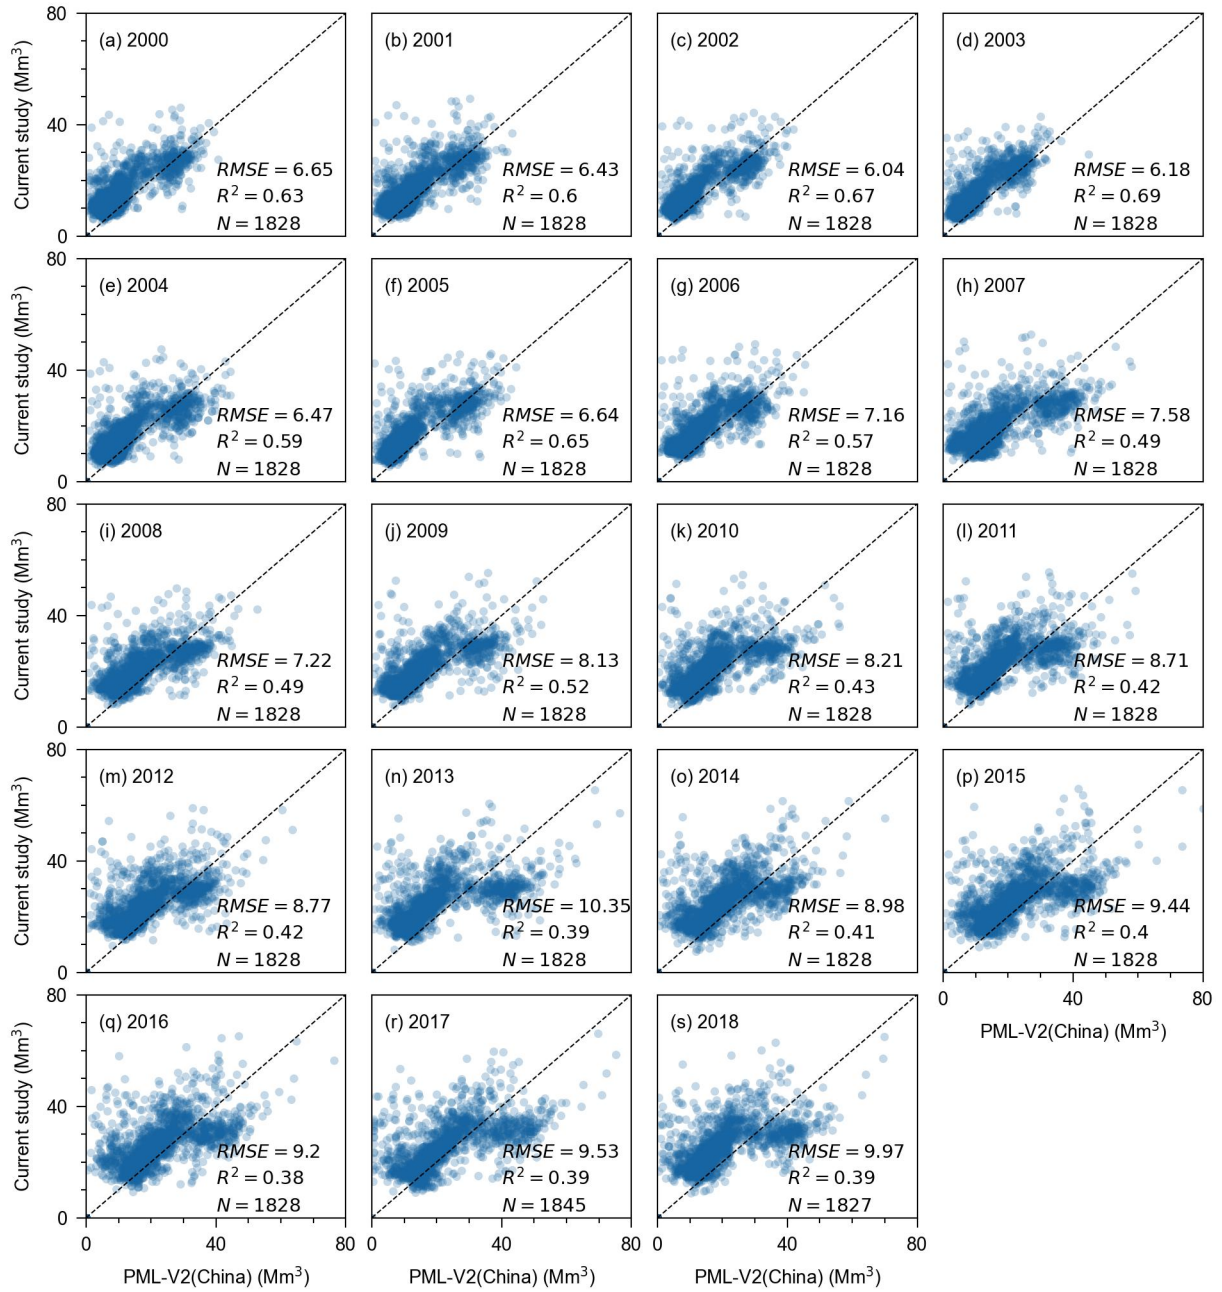

Figure S35. Validation of the transpiration at croplands for the period April to August with PML-V2(China) datasets (He et al., 2022).

## Phenology selection

There are some phenology datasets for major Chinese crops. The dataset generated by Luo et al. (2020), which only encompasses three major crops wheat, rice and maize. As indicated on the website of China Meteorological Data Service Center, the “Ten-day Values Dataset of Crop Growth and Development and Soil Moisture Content” they published has not gone through quality control and is of average quality. According to the regional classification results (Table S3), we mainly used phenology data published by Chen et al. (1995) for model input since it is widely used and its reliability is validated (Long et al., 2010; Cao et al., 2014; Ding et al., 2020).

**Table S3. Regional classification.**

| Region         | Provinces                                     | Regional classification                        |
|----------------|-----------------------------------------------|------------------------------------------------|
| North          | Beijing, Tianjin, Shanxi                      | Temperate                                      |
| Northeast      | Inner Mongolia, Liaoning, Jilin, Heilongjiang | Continental temperate and temperate            |
| Huang-huai-hai | Hebei, Henan, Shandong, Anhui                 | Temperate                                      |
| Northwest      | Shaanxi, Gansu, Qinghai, Ningxia, Xinjiang    | Continental temperate and plateau and Mountain |
| Southeast      | Shanghai, Zhejiang, Fujian                    | Sub-tropics                                    |
| East           | Jiangsu, Hubei, Hunan, Jiangxi                | Sub-tropics                                    |
| South          | Guangdong, Guangxi, Hainan                    | Sub-tropics and tropics                        |
| Southwest      | Chongqing, Sichuan, Guizhou, Yunan, Tibet     | Sub-tropics                                    |

In discussion section, we indicated that “The effect of planting date (PD) differed for each crop, and advancing or delaying it exposed crops to completely different rain and heat conditions .... in future research, attention to the collection and organisation of basic data can play a positive role in the improvement of the model mechanism and accuracy of the output.” As shown in Table S4, our previous study conducted a sensitivity analysis of WFCP to PD at the site scale. The results indicated that when PD shifts  $\pm 10$  days, the change in WFCP remains within 4%. With PD shifts of  $\pm 20$  days, the variation in WFCP is under 8.5%.

**Table S4. Sensitivity analysis of water footprint of crop production to planting date.**

| Crop                   | -20 days | -15 days | -10 days | -5 days | +5 days | +10 days | +15 days | +20 days |
|------------------------|----------|----------|----------|---------|---------|----------|----------|----------|
| Wheat<br>(297 sites)   | -5.9%    | -4.5%    | -3.0%    | -1.4%   | 2.0%    | 3.9%     | 5.6%     | 7.5%     |
| Maize<br>(304 sites)   | -0.4%    | 0.0%     | 0.2%     | 0.3%    | 0.2%    | -0.1%    | -0.6%    | -1.5%    |
| Rice<br>(480 sites)    | 0.4%     | 0.5%     | 0.5%     | 0.4%    | -0.5%   | -1.1%    | -2.3%    | -3.6%    |
| Soybean<br>(299 sites) | 6.3%     | 5.0%     | 3.5%     | 1.8%    | -1.9%   | -4.0%    | -6.2%    | -8.5%    |

Note: “-” means advance planting date. “+” means delay planting date. Sources: Li et al., (2022).



In short, PD's effect on WFCP estimation is acceptable since crop water consumption is primarily concentrated in crop development (L2) and mid-season (L3) stages. In this study for instance, with over 13 crops having L2 and L3 water consumption proportions exceeding 80% (Fig. S36). Therefore, minor shifts in PD forward or backward have relatively small influences on WFCP.

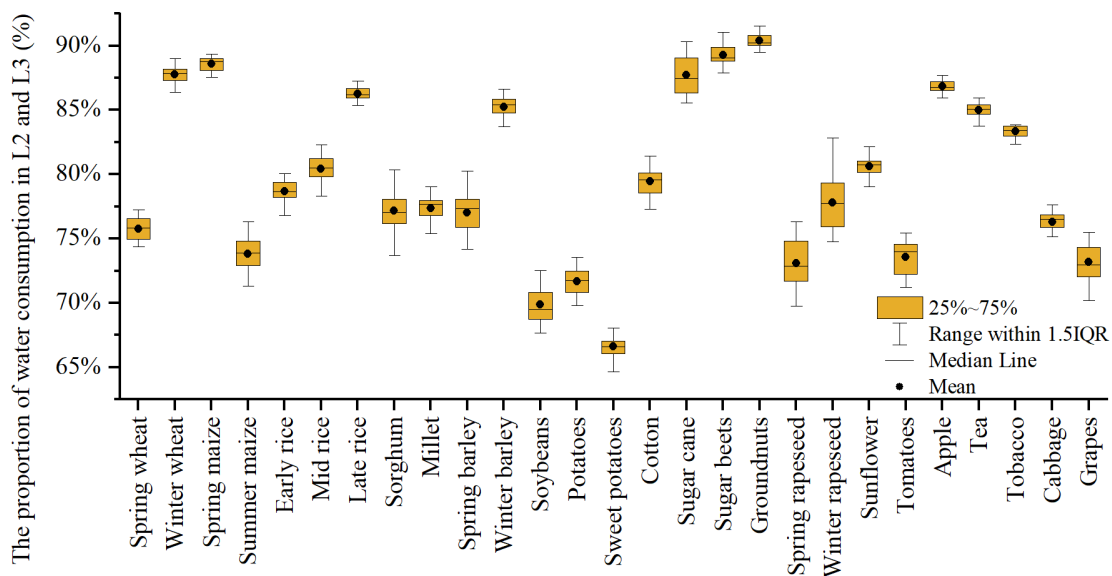

Fig. S36 The proportions of crop water consumption in stages L2 and L3 for various crops.

In addition to considering fixed planting dates and crop duration, we conducted a sensitivity analysis of the effect of growing degree days (GDD) on the quantification of WFCP (Zhuo et al., 2014). The GDD measures heat units during crop growth, greatly improves the accuracy of expressing and predicting crop phenological cycles compared to other methods like calendar year or days (McMaster and Wilhelm, 1997). The results indicated that when wheat PD was shifted 30 days earlier than the reference date, yield and WFCP decreased by 0.25% and 0.3% respectively. When rice planting was delayed by 30 days, yield and WFCP reduced by 0.2% and 9.3% respectively. Therefore, under constant GDD, yield and WFCP showed low sensitivity to changes in crop PD.

## References

- Cao, X., Wu, P., Wang, Y., and Zhao, X.: Assessing blue and green water utilisation in wheat production of China from the perspectives of water footprint and total water use, *Hydrol. Earth Syst. Sci.*, 18(8), 3165-3178, <https://doi.org/10.5194/hess-18-3165-2014>, 2014.
- Chen, Y., Guo, G., Wang, G., Kang, S., Luo, H., and Zhang, D.: Main crop water requirement and irrigation of China, Hydraulic and Electric Press, Beijing, 1995.
- Cheng, M., Jiao, X., Li, B., Yu, X., Shao, M., and Jin, X.: Long time series of daily evapotranspiration in China based on the SEBAL model and multisource images and validation, *Earth Syst. Sci. Data*, 13, 3995-4017, <https://doi.org/10.5194/essd-13-3995-2021>, 2021.
- Chiarelli, D. D., D'Odorico, P., Müller, M. F., Mueller, N. D., Davis, K. F., Dell'Angelo, J., Penny, G., and Rulli, M. C.: Competition for water induced by transnational land acquisitions for agriculture, *Nat. Commun.*, 13(1), 505, <https://doi.org/10.1038/s41467-022-28077-2>, 2022.
- Chiarelli, D. D., Passera, C., Rosa, L., Davis, K. F., D'Odorico, P., and Rulli, M. C.: The green and blue crop water requirement WATNEEDS model and its global gridded outputs, *Sci. Data*, 7, 273, <https://doi.org/10.1038/s41597-020-00612-0>, 2020.
- Ding, Y., Wang, W., Zhuang, Q., and Luo, Y.: Adaptation of paddy rice in China to climate change: The effects of shifting sowing date on yield and irrigation water requirement, *Agric. Water Manage.*, 228, 105890, <https://doi.org/10.1016/j.agwat.2019.105890>, 2020.
- GFSAD1KCD.: Global Food Security Support Analysis Data (GFSAD) Crop Dominance 2010 Global 1 km, available at: <https://doi.org/10.5067/MEaSURES/GFSAD/GFSAD1KCD.001>. (last access: 6 September 2023), 2014.
- Grogan, D., Frohling, S., Wisser, D., Prusevich, A., and Glidden, S.: Global gridded crop harvested area, production, yield, and monthly physical area data circa 2015, *Sci. Data*, 9, 15, <https://doi.org/10.1038/s41597-021-01115-2>, 2022.
- He, S., Zhang, Y., Ma, N., Tian, J., Kong, D., and Liu, C.: A daily and 500 m coupled evapotranspiration and gross primary production product across China during 2000–2020, *Earth Syst. Sci. Data*, 14, 5463-5488, <https://doi.org/10.5194/essd-14-5463-2022>, 2022.
- Hoch, J. M., Sutanudjaja, E. H., Wanders, N., Van Beek, R. L., and Bierkens, M. F.: Hyper-resolution PCR-GLOBWB: opportunities and challenges from refining model spatial resolution to 1 km over the European continent, *Hydrol. Earth Syst. Sci.*, 27(6), 1383-1401, <https://doi.org/10.5194/hess-27-1383-2023>, 2023.
- IFPRI, International Food Policy Research Institute: Global spatially-disaggregated crop production statistics data for 2010 version 2.0, available at: <https://doi.org/10.7910/DVN/PRFF8V>. (last access: 7 March 2023), 2019.
- Li, Z., Sun, S., Zhao, J., Li, C., Gao, Z., Yin, Y., Wang, Y., and Wu, P.: Large Scale Crop Water Footprint Evaluation Based on Remote Sensing Methods: A Case Study of Maize, *Water Resour. Res.*, e2022WR032630, <https://doi.org/10.1029/2022WR032630>, 2023.
- Liu, X., Liu, W., Tang, Q., Liu, B., Wada, Y., and Yang, H.: Global agricultural water scarcity assessment incorporating blue and green water availability under future climate change, *Earths Future*, 10(4), e2021EF002567, <https://doi.org/10.1029/2021EF002567>, 2022.
- Long, D., Gao, Y., and Singh, V. P.: Estimation of daily average net radiation from MODIS data and DEM over the Baiyangdian

- watershed in North China for clear sky days, *J. Hydrol.*, 388(3-4), 217-233, <https://doi.org/10.1016/j.jhydrol.2010.04.042>, 2010.
- Luo, Y., Zhang, Z., Chen, Y., Li, Z., and Tao, F.: ChinaCropPhen1km: a high-resolution crop phenological dataset for three staple crops in China during 2000–2015 based on leaf area index (LAI) products, *Earth Syst. Sci. Data*, 12(1), 197-214, <https://doi.org/10.5194/essd-12-197-2020>, 2020.
- Lutz, A. F., Immerzeel, W. W., Siderius, C., Wijngaard, R. R., Nepal, S., Shrestha, A. B., Wester, P., and Biemans, H.: South Asian agriculture increasingly dependent on meltwater and groundwater, *Nat Clim Chang*, 12(6), 566-573, <https://doi.org/10.1038/s41558-022-01355-z>, 2022.
- McMaster, G. S., and Wilhelm, W. W.: Growing degree-days: one equation, two interpretations, *Agr. Forest. Meteorol.*, 87(4), 291-300, [https://doi.org/10.1016/S0168-1923\(97\)00027-0](https://doi.org/10.1016/S0168-1923(97)00027-0), 1977.
- Mialyk, O., Schyns, J. F., Booij, M. J., and Hogeboom, R. J.: Historical simulation of maize water footprints with a new global gridded crop model ACEA, *Hydrol. Earth Syst. Sci.*, 26, 923-940, <https://doi.org/10.5194/hess-26-923-2022>, 2022.
- Portmann, F. T., Siebert, S., and Döll, P.: MIRCA2000—Global monthly irrigated and rainfed crop areas around the year 2000: A new high-resolution data set for agricultural and hydrological modeling, *Glob. Biogeochem. Cycle*, 24, GB1011, <https://doi.org/10.1029/2008GB003435>, 2010.
- Rosa, L., Chiarelli, D. D., Rulli, M. C., Dell'Angelo, J., and D'Odorico, P.: Global agricultural economic water scarcity, *Sci. Adv.*, 6(18), eaaz6031, <https://doi.org/10.1126/sciadv.aaz6031>, 2020.
- Ruess, P. J., Konar, M., Wanders, N., and Bierkens, M.: Irrigation by crop in the Continental United States from 2008 to 2020, *Water Resour. Res.*, 59(2), e2022WR032804, <https://doi.org/10.1029/2022WR032804>, 2023.
- Sloat, L. L., Davis, S. J., Gerber, J. S., Moore, F. C., Ray, D. K., West, P. C., and Mueller, N. D.: Climate adaptation by crop migration, *Nat. Commun.*, 11(1), 1243. <https://doi.org/10.1038/s41467-020-15076-4>, 2020.
- Wang, W., Zhuo, L., Li, M., Liu, Y., and Wu, P.: The effect of development in water-saving irrigation techniques on spatial-temporal variations in crop water footprint and benchmarking, *J. Hydrol.*, 577, 123916, <https://doi.org/10.1016/j.jhydrol.2019.123916>, 2019.
- Yue, Z., Ji, X., Zhuo, L., Wang, W., Li, Z., and Wu, P.: Spatiotemporal responses of the crop water footprint and its associated benchmarks under different irrigation regimes to climate change scenarios in China, *Hydrol. Earth Syst. Sci.*, 26, 4637-4656, <https://doi.org/10.5194/hess-26-4637-2022>, 2022.
- Zhang, C., Dong, J. and Ge, Q.: Mapping 20 years of irrigated croplands in China using MODIS and statistics and existing irrigation products, *Sci. Data*, 9, 407, <https://doi.org/10.1038/s41597-022-01522-z>, 2022a.
- Zhang, L., Zhang, K., Zhu, X., Chen, H., and Wang, W.: Integrating remote sensing, irrigation suitability and statistical data for irrigated cropland mapping over mainland China, *J. Hydrol.*, 613, 128413, <https://doi.org/10.1016/j.jhydrol.2022.128413>, 2022b.
- Zhu, X., Zhu, W., Zhang, J., and Pan, Y.: Mapping irrigated areas in China from remote sensing and statistical data, *IEEE Journal of Selected Topics in Applied Earth Observations and Remote Sensing*, 7(11), 4490-4504, <https://doi.org/10.1109/JSTARS.2013.2296899>, 2014.
- Zhuo, L., Mekonnen, M. M., and Hoekstra, A. Y.: Sensitivity and uncertainty in crop water footprint accounting: a case study for the Yellow River basin, *Hydrol. Earth Syst. Sci.*, 18(6), 2219-2234, <https://doi.org/10.5194/hess-18-2219-2014>, 2014.
